# Supplementary material for: Synthesis and characterization of photochromic triethylene glycol-containing spiropyrans and their assembly in solution
Source: Royal Society of Chemistry journal article supplement (doi:10.1039/d1qo00316j), 2021-01-01
Supplement: d1qo00316j1.pdf [file d1qo00316j1.pdf]

## **Supporting Information**

### **Synthesis and Characterization of Photochromic Triethylene Glycol- Containing Spiropyrans and Their Assembly in Solution**

Yiwei Zhang,<sup>a,b</sup> Maggie Ng,<sup>b</sup> Michael Ho-Yeung Chan,<sup>b</sup> Nathan Man-Wai Wu,<sup>b</sup> Lixin Wu\*<sup>a</sup> and  
Vivian Wing-Wah Yam\*<sup>a,b</sup>

<sup>a</sup>State Key Laboratory of Supramolecular Structure and Materials and College of Chemistry, Jilin  
University, Changchun 130012, P. R. China

<sup>b</sup>Institute of Molecular Functional Materials and Department of Chemistry, The University of  
Hong Kong, Pokfulam Road, Hong Kong, P. R. China

Table S1. The first twenty singlet excited states ( $S_n$ ) of the closed and open forms of **5** computed by TDDFT/PCM using THF as the solvent.

| Compound           | $S_n$           | Excitation <sup>a</sup><br>(Coefficient) <sup>b</sup> | Vertical excitation<br>wavelength / nm | $f^c$ |
|--------------------|-----------------|-------------------------------------------------------|----------------------------------------|-------|
| <b>5</b><br>Closed | $S_1$           | H-20→L (0.63)                                         | 305                                    | 0.000 |
|                    | $S_2$           | H-2→L (0.68)                                          | 292                                    | 0.252 |
|                    | $S_3$           | H-2→L+1 (0.38)                                        | 278                                    | 0.010 |
|                    |                 | H→L (-0.37)                                           |                                        |       |
|                    |                 | H-6→L (-0.33)                                         |                                        |       |
|                    |                 | $S_4$                                                 | H-2→L+1 (0.44)<br>H→L (0.39)           | 269   |
|                    | $S_5$           | H-26→L (0.62)                                         | 267                                    | 0.000 |
|                    | $S_6$           | H→L+1 (0.49)                                          | 254                                    | 0.043 |
|                    | $S_7$           | H-6→L (0.40)                                          | 250                                    | 0.369 |
|                    | $S_8$           | H-6→L (0.31)                                          | 249                                    | 0.401 |
|                    |                 | H-3→L+2 (-0.31)                                       |                                        |       |
|                    | $S_9$           | H→L+4 (0.44)                                          | 244                                    | 0.036 |
|                    | $S_{10}$        | H-1→L+2 (0.41)                                        | 243                                    | 0.538 |
|                    | $S_{11}$        | H-1→L (0.62)                                          | 241                                    | 0.003 |
|                    |                 | H→L (0.33)                                            |                                        |       |
|                    | $S_{12}$        | H→L+6 (0.48)                                          | 218                                    | 0.249 |
|                    | $S_{13}$        | H-6→L+1 (0.54)                                        | 213                                    | 0.208 |
|                    | $S_{14}$        | H-1→L+3 (0.40)                                        | 213                                    | 0.046 |
|                    | $S_{15}$        | H-3→L (0.70)                                          | 212                                    | 0.000 |
|                    | $S_{16}$        | H-1→L+1 (0.60)                                        | 209                                    | 0.001 |
| H→L+1 (0.35)       |                 |                                                       |                                        |       |
| $S_{17}$           | H-4→L (0.68)    | 206                                                   | 0.003                                  |       |
| $S_{18}$           | H-17→L+3 (0.56) | 205                                                   | 0.011                                  |       |
| $S_{19}$           | H-3→L+2 (0.35)  | 199                                                   | 0.675                                  |       |
| $S_{20}$           | H→L+3 (0.29)    | 195                                                   | 0.141                                  |       |
|                    | H→L+2 (-0.28)   |                                                       |                                        |       |
|                    | H-1→L+7 (0.28)  |                                                       |                                        |       |
|                    | H-1→L+3 (-0.27) |                                                       |                                        |       |
| <b>5</b><br>Open   | $S_1$           | H→L (0.69)                                            | 455                                    | 0.926 |
|                    | $S_2$           | H-4→L (0.64)                                          | 358                                    | 0.000 |
|                    | $S_3$           | H-3→L (0.58)                                          | 317                                    | 0.069 |
|                    | $S_4$           | H-1→L (0.63)                                          | 311                                    | 0.040 |
|                    | $S_5$           | H-19→L (0.59)                                         | 306                                    | 0.000 |
|                    | $S_6$           | H→L+1 (0.59)                                          | 301                                    | 0.559 |
|                    | $S_7$           | H-2→L (0.70)                                          | 272                                    | 0.001 |
|                    | $S_8$           | H-23→L+1 (0.61)                                       | 265                                    | 0.000 |
| H-23→L (0.32)      |                 |                                                       |                                        |       |

|                 |                |     |       |
|-----------------|----------------|-----|-------|
| S <sub>9</sub>  | H-10→L (0.59)  | 259 | 0.052 |
| S <sub>10</sub> | H-4→L+1 (0.56) | 252 | 0.001 |
| S <sub>11</sub> | H-15→L (0.53)  | 251 | 0.036 |
| S <sub>12</sub> | H-2→L+3 (0.43) | 250 | 0.126 |
| S <sub>13</sub> | H-3→L+1 (0.48) | 246 | 0.052 |
| S <sub>14</sub> | H-1→L+3 (0.54) | 242 | 0.613 |
| S <sub>15</sub> | H-1→L+1 (0.61) | 232 | 0.010 |
| S <sub>16</sub> | H→L+2 (0.42)   | 231 | 0.067 |
| S <sub>17</sub> | H→L+4 (0.52)   | 226 | 0.021 |
| S <sub>18</sub> | H-8→L (0.55)   | 222 | 0.001 |
| S <sub>19</sub> | H-1→L+5 (0.50) | 214 | 0.009 |
| S <sub>20</sub> | H-2→L+1 (0.65) | 213 | 0.000 |

<sup>a</sup> Orbitals involved in the major excitation (H = HOMO and L = LUMO).

<sup>b</sup> The coefficients in the configuration interaction (CI) expansion that are less than 0.3 are not listed.

<sup>c</sup> Oscillator strengths.

Table S2. Cartesian coordinates of the ground-state geometry of the closed form of compound **5** optimized at the CAM-B3LYP level.

|    |   |            |           |           |     |   |           |           |           |
|----|---|------------|-----------|-----------|-----|---|-----------|-----------|-----------|
| 1  | C | -8.012456  | -1.186784 | -2.277769 | 54  | H | 6.235481  | 3.158658  | 0.601264  |
| 2  | C | -9.173074  | -1.964156 | -2.271038 | 55  | H | 5.536310  | 2.220085  | 1.937695  |
| 3  | C | -7.998802  | 0.089972  | -2.820034 | 56  | C | 3.601666  | -1.208053 | -0.261696 |
| 4  | C | -10.343211 | -1.471855 | -2.812411 | 57  | H | 3.270751  | -1.430226 | -1.283816 |
| 5  | C | -9.190119  | 0.578375  | -3.365022 | 58  | H | 4.288360  | -0.358107 | -0.277014 |
| 6  | H | -7.103539  | 0.702418  | -2.819928 | 59  | C | 4.290673  | -2.422479 | 0.325507  |
| 7  | C | -10.350523 | -0.185269 | -3.363642 | 60  | H | 4.716307  | -2.173889 | 1.308124  |
| 8  | H | -11.249682 | -2.070192 | -2.807644 | 61  | H | 3.562723  | -3.234119 | 0.469230  |
| 9  | H | -9.203495  | 1.576729  | -3.790760 | 62  | O | 0.628776  | 7.146969  | 0.165094  |
| 10 | H | -11.264524 | 0.215922  | -3.788347 | 63  | C | 1.186676  | 8.393089  | 0.514494  |
| 11 | N | -6.959317  | -1.894599 | -1.679092 | 64  | H | 2.111653  | 8.582694  | -0.049264 |
| 12 | C | -8.852777  | -3.315205 | -1.662518 | 65  | H | 1.434624  | 8.427030  | 1.585289  |
| 13 | C | -9.930728  | -3.861228 | -0.729549 | 66  | C | 0.160413  | 9.459426  | 0.191149  |
| 14 | H | -9.588720  | -4.775612 | -0.234917 | 67  | H | -0.090035 | 9.422716  | -0.879210 |
| 15 | H | -10.211123 | -3.134723 | 0.033386  | 68  | H | -0.763804 | 9.269768  | 0.756368  |
| 16 | H | -10.824084 | -4.115067 | -1.306178 | 69  | O | 0.719778  | 10.704164 | 0.537834  |
| 17 | C | -8.592275  | -4.322556 | -2.796257 | 70  | C | -0.145120 | 11.787120 | 0.285012  |
| 18 | H | -9.498412  | -4.427629 | -3.397406 | 71  | H | -0.409584 | 11.839893 | -0.781252 |
| 19 | H | -7.788527  | -3.986118 | -3.456030 | 72  | H | -1.079982 | 11.686750 | 0.855637  |
| 20 | H | -8.332179  | -5.308397 | -2.401130 | 73  | C | 0.573756  | 13.054997 | 0.697976  |
| 21 | C | -5.760007  | -1.214907 | -1.238936 | 74  | H | 0.839567  | 13.000900 | 1.764586  |
| 22 | H | -5.987328  | -0.196471 | -0.902329 | 75  | H | 1.510087  | 13.153651 | 0.128021  |
| 23 | H | -5.338747  | -1.751775 | -0.386259 | 76  | O | -0.290406 | 14.135850 | 0.444852  |
| 24 | C | -4.727151  | -1.155848 | -2.369425 | 77  | C | 0.278675  | 15.375568 | 0.793343  |
| 25 | H | -4.350966  | -2.152731 | -2.602434 | 78  | H | 1.195956  | 15.574190 | 0.221203  |
| 26 | H | -5.172323  | -0.739456 | -3.273716 | 79  | H | -0.454950 | 16.150811 | 0.565687  |
| 27 | N | -3.599576  | -0.310424 | -2.015082 | 80  | H | 0.524132  | 15.420782 | 1.863812  |
| 28 | C | -2.418150  | -0.647307 | -1.456819 | 81  | O | 6.127569  | 1.119388  | 0.282639  |
| 29 | C | -1.768422  | 0.553670  | -1.268433 | 82  | C | 7.349300  | 0.741863  | 0.877223  |
| 30 | H | -2.148873  | -1.670729 | -1.251062 | 83  | H | 8.055254  | 1.584976  | 0.890092  |
| 31 | N | -3.694507  | 1.015966  | -2.160944 | 84  | H | 7.196045  | 0.420594  | 1.917744  |
| 32 | N | -2.593698  | 1.540762  | -1.716071 | 85  | C | 7.934899  | -0.401043 | 0.072487  |
| 33 | C | -0.442602  | 0.836840  | -0.705733 | 86  | H | 8.181270  | -0.056968 | -0.942990 |
| 34 | C | -0.048267  | 2.163526  | -0.513843 | 87  | H | 7.194935  | -1.207630 | -0.021264 |
| 35 | C | 0.425653   | -0.190782 | -0.352127 | 88  | O | 9.093039  | -0.830845 | 0.752571  |
| 36 | C | 1.196515   | 2.457401  | 0.029225  | 89  | C | 9.791517  | -1.861450 | 0.090186  |
| 37 | H | -0.739405  | 2.951754  | -0.778054 | 90  | H | 10.064357 | -1.557694 | -0.931418 |
| 38 | C | 1.678247   | 0.100929  | 0.175321  | 91  | H | 9.188511  | -2.777546 | 0.021524  |
| 39 | H | 0.159691   | -1.234253 | -0.476859 | 92  | C | 11.047693 | -2.137447 | 0.891736  |
| 40 | C | 2.091353   | 1.423010  | 0.359889  | 93  | H | 11.653271 | -1.221286 | 0.958640  |
| 41 | O | 1.621797   | 3.720818  | 0.299547  | 94  | H | 10.777618 | -2.432362 | 1.916801  |
| 42 | O | 2.475324   | -0.939806 | 0.571304  | 95  | O | 11.760714 | -3.163636 | 0.241584  |
| 43 | O | 3.308046   | 1.643627  | 0.937046  | 96  | C | 12.972497 | -3.473017 | 0.890061  |
| 44 | C | 0.755965   | 4.805786  | 0.010738  | 97  | H | 13.454501 | -4.271785 | 0.323786  |
| 45 | H | 0.521217   | 4.845158  | -1.058982 | 98  | H | 13.643781 | -2.603609 | 0.922079  |
| 46 | H | -0.182295  | 4.713717  | 0.569288  | 99  | H | 12.803255 | -3.817331 | 1.919787  |
| 47 | C | 1.486930   | 6.064725  | 0.430670  | 100 | O | 5.300767  | -2.807622 | -0.579793 |
| 48 | H | 2.427790   | 6.157345  | -0.131499 | 101 | C | 6.126402  | -3.839675 | -0.089384 |
| 49 | H | 1.738769   | 6.010077  | 1.499693  | 102 | H | 6.725600  | -3.488876 | 0.763936  |
| 50 | C | 4.211682   | 2.548713  | 0.294527  | 103 | H | 5.526530  | -4.694697 | 0.252573  |
| 51 | H | 4.202351   | 2.386014  | -0.789271 | 104 | C | 7.052530  | -4.251424 | -1.217147 |
| 52 | H | 3.917078   | 3.580234  | 0.495213  | 105 | H | 7.440446  | -3.349702 | -1.713574 |
| 53 | C | 5.592840   | 2.298692  | 0.842427  | 106 | H | 6.508054  | -4.838125 | -1.970554 |

|     |   |           |           |           |
|-----|---|-----------|-----------|-----------|
| 107 | O | 8.101952  | -5.003522 | -0.653365 |
| 108 | C | 8.983615  | -5.533689 | -1.619098 |
| 109 | H | 9.357371  | -4.742001 | -2.284119 |
| 110 | H | 8.475442  | -6.283844 | -2.242330 |
| 111 | C | 10.141339 | -6.173533 | -0.880939 |
| 112 | H | 10.699604 | -5.402453 | -0.331354 |
| 113 | H | 9.754610  | -6.902763 | -0.152299 |
| 114 | O | 10.957035 | -6.804746 | -1.841617 |
| 115 | C | 12.087867 | -7.415582 | -1.269802 |
| 116 | H | 12.659397 | -7.875936 | -2.077829 |
| 117 | H | 12.726816 | -6.684180 | -0.754490 |
| 118 | H | 11.805369 | -8.193596 | -0.546073 |
| 119 | C | -7.516683 | -2.977658 | -0.901433 |
| 120 | C | -6.559405 | -4.121377 | -0.749977 |
| 121 | C | -7.611870 | -2.993254 | 1.573024  |
| 122 | C | -6.251547 | -4.667628 | 0.425997  |
| 123 | H | -6.128695 | -4.497095 | -1.670099 |
| 124 | C | -6.810020 | -4.142847 | 1.663455  |
| 125 | C | -8.145101 | -2.398156 | 2.718470  |
| 126 | H | -5.564345 | -5.505790 | 0.484885  |
| 127 | C | -6.561702 | -4.694410 | 2.912562  |
| 128 | C | -7.897014 | -2.954796 | 3.958683  |
| 129 | H | -8.752639 | -1.507381 | 2.612754  |
| 130 | C | -7.109655 | -4.100305 | 4.040687  |
| 131 | H | -5.944249 | -5.577994 | 3.015399  |
| 132 | H | -8.304272 | -2.519349 | 4.861448  |
| 133 | O | -7.881784 | -2.406510 | 0.395281  |
| 134 | N | -6.849116 | -4.687521 | 5.343081  |
| 135 | O | -7.340536 | -4.150041 | 6.328469  |
| 136 | O | -6.150415 | -5.693160 | 5.395013  |

Table S3. Cartesian coordinates of the ground-state geometry of the open form of compound **5** optimized at the CAM-B3LYP level.

|    |   |           |            |           |     |   |            |           |           |
|----|---|-----------|------------|-----------|-----|---|------------|-----------|-----------|
| 1  | C | 4.016991  | -8.110432  | 0.218471  | 54  | H | -4.748391  | 4.253175  | -0.444968 |
| 2  | C | 5.401768  | -8.154177  | 0.124671  | 55  | H | -4.322979  | 3.746900  | 1.205307  |
| 3  | C | 3.228300  | -9.248524  | 0.203166  | 56  | C | -0.148065  | 2.513192  | -0.070726 |
| 4  | C | 6.045137  | -9.374028  | 0.018928  | 57  | H | -0.324729  | 2.317860  | -1.135231 |
| 5  | C | 3.887015  | -10.472558 | 0.095813  | 58  | H | -0.942535  | 3.160844  | 0.301094  |
| 6  | H | 2.147282  | -9.207472  | 0.266165  | 59  | C | 1.205286   | 3.167700  | 0.122536  |
| 7  | C | 5.275170  | -10.538058 | 0.006116  | 60  | H | 1.419023   | 3.258606  | 1.197780  |
| 8  | H | 7.126492  | -9.431502  | -0.054481 | 61  | H | 1.995756   | 2.545872  | -0.323463 |
| 9  | H | 3.303408  | -11.386541 | 0.080455  | 62  | C | 4.668799   | -5.921106 | 0.276405  |
| 10 | H | 5.762644  | -11.503199 | -0.076963 | 63  | C | 4.501220   | -4.533456 | 0.324299  |
| 11 | N | 3.615660  | -6.756507  | 0.322559  | 64  | H | 3.503291   | -4.128296 | 0.388385  |
| 12 | C | 5.953527  | -6.744467  | 0.158855  | 65  | C | 5.523644   | -3.603580 | 0.305256  |
| 13 | C | 6.855988  | -6.553007  | 1.393361  | 66  | H | 6.549166   | -3.957085 | 0.260243  |
| 14 | H | 7.255918  | -5.539999  | 1.452128  | 67  | C | 5.390316   | -2.197244 | 0.347956  |
| 15 | H | 6.308907  | -6.761400  | 2.315352  | 68  | C | 6.577718   | -1.435679 | 0.360828  |
| 16 | H | 7.698410  | -7.245779  | 1.332840  | 69  | C | 4.094595   | -1.507363 | 0.386345  |
| 17 | C | 6.708933  | -6.435199  | -1.147344 | 70  | C | 6.542240   | -0.067505 | 0.425169  |
| 18 | H | 7.547991  | -7.127198  | -1.249125 | 71  | H | 7.539920   | -1.933653 | 0.323500  |
| 19 | H | 6.058514  | -6.559441  | -2.015961 | 72  | C | 4.139966   | -0.058993 | 0.470084  |
| 20 | H | 7.106436  | -5.419669  | -1.157352 | 73  | C | 5.305862   | 0.632810  | 0.486412  |
| 21 | C | 2.227078  | -6.337468  | 0.437013  | 74  | H | 3.182547   | 0.448640  | 0.520640  |
| 22 | H | 1.661754  | -7.142381  | 0.905895  | 75  | H | 5.322649   | 1.713930  | 0.545608  |
| 23 | H | 2.177058  | -5.481043  | 1.110093  | 76  | N | 7.774516   | 0.672112  | 0.436686  |
| 24 | C | 1.627833  | -5.968185  | -0.932282 | 77  | O | 7.714802   | 1.898831  | 0.496503  |
| 25 | H | 2.382599  | -5.476810  | -1.548946 | 78  | O | 8.836501   | 0.053317  | 0.385896  |
| 26 | H | 1.269806  | -6.850310  | -1.462479 | 79  | O | 2.997826   | -2.106028 | 0.350423  |
| 27 | N | 0.506805  | -5.063000  | -0.784809 | 80  | O | -7.781706  | -1.819739 | -0.113944 |
| 28 | C | 0.551926  | -3.736432  | -0.544009 | 81  | C | -9.124023  | -1.405190 | -0.004089 |
| 29 | C | -0.768074 | -3.368203  | -0.421591 | 82  | H | -9.357304  | -0.625430 | -0.743658 |
| 30 | H | 1.476516  | -3.180255  | -0.468536 | 83  | H | -9.328223  | -0.991291 | 0.994025  |
| 31 | N | -0.759200 | -5.506985  | -0.808508 | 84  | C | -9.997775  | -2.618821 | -0.246092 |
| 32 | N | -1.531068 | -4.485006  | -0.595011 | 85  | H | -9.788990  | -3.034368 | -1.242822 |
| 33 | C | -1.323896 | -2.036483  | -0.156235 | 86  | H | -9.766666  | -3.397986 | 0.494954  |
| 34 | C | -2.707008 | -1.837716  | -0.171942 | 87  | O | -11.338755 | -2.202515 | -0.141983 |
| 35 | C | -0.473678 | -0.968405  | 0.108897  | 88  | C | -12.259132 | -3.248072 | -0.352214 |
| 36 | C | -3.227240 | -0.576269  | 0.085586  | 89  | H | -12.135317 | -3.687086 | -1.353055 |
| 37 | H | -3.354346 | -2.680840  | -0.370124 | 90  | H | -12.117342 | -4.052531 | 0.384292  |
| 38 | C | -0.993032 | 0.302364   | 0.342580  | 91  | C | -13.651879 | -2.667851 | -0.216023 |
| 39 | H | 0.603466  | -1.095596  | 0.150738  | 92  | H | -13.775201 | -2.228409 | 0.785450  |
| 40 | C | -2.374748 | 0.516755   | 0.332512  | 93  | H | -13.791470 | -1.860709 | -0.951106 |
| 41 | O | -4.559505 | -0.305148  | 0.146010  | 94  | O | -14.570579 | -3.711854 | -0.428424 |
| 42 | O | -0.095171 | 1.283457   | 0.653383  | 95  | C | -15.907922 | -3.284413 | -0.323844 |
| 43 | O | -2.870479 | 1.750087   | 0.661099  | 96  | H | -16.144205 | -2.510704 | -1.067990 |
| 44 | C | -5.476421 | -1.365905  | -0.061262 | 97  | H | -16.546129 | -4.151852 | -0.500765 |
| 45 | H | -5.357807 | -1.796362  | -1.062219 | 98  | H | -16.125793 | -2.879639 | 0.674593  |
| 46 | H | -5.325697 | -2.160563  | 0.678112  | 99  | O | -2.785393  | 4.599791  | 0.106908  |
| 47 | C | -6.863018 | -0.773926  | 0.088624  | 100 | C | -2.932728  | 5.868571  | 0.700536  |
| 48 | H | -7.008992 | 0.029444   | -0.648444 | 101 | H | -3.791291  | 6.406722  | 0.272652  |
| 49 | H | -6.975171 | -0.334168  | 1.090181  | 102 | H | -3.100217  | 5.780561  | 1.783828  |
| 50 | C | -3.647534 | 2.424491   | -0.333607 | 103 | C | -1.658511  | 6.645544  | 0.439178  |
| 51 | H | -3.083745 | 2.484987   | -1.271949 | 104 | H | -1.521757  | 6.784287  | -0.643555 |
| 52 | H | -4.578747 | 1.883245   | -0.513609 | 105 | H | -0.791516  | 6.079384  | 0.808118  |
| 53 | C | -3.952063 | 3.810932   | 0.172203  | 106 | O | -1.779273  | 7.886552  | 1.095818  |

|     |   |           |           |           |
|-----|---|-----------|-----------|-----------|
| 107 | C | -0.650050 | 8.710365  | 0.929557  |
| 108 | H | -0.470941 | 8.925738  | -0.134584 |
| 109 | H | 0.253924  | 8.226763  | 1.328857  |
| 110 | C | -0.907432 | 10.004270 | 1.674195  |
| 111 | H | -1.813754 | 10.486915 | 1.278085  |
| 112 | H | -1.083952 | 9.791500  | 2.739423  |
| 113 | O | 0.221818  | 10.825077 | 1.500688  |
| 114 | C | 0.095173  | 12.064771 | 2.155805  |
| 115 | H | 1.008550  | 12.631717 | 1.967931  |
| 116 | H | -0.763389 | 12.636546 | 1.776101  |
| 117 | H | -0.028471 | 11.937729 | 3.240597  |
| 118 | O | 1.162026  | 4.434951  | -0.492638 |
| 119 | C | 2.392424  | 5.118455  | -0.424867 |
| 120 | H | 2.678921  | 5.313906  | 0.618735  |
| 121 | H | 3.196504  | 4.526351  | -0.885991 |
| 122 | C | 2.234380  | 6.428941  | -1.168220 |
| 123 | H | 1.431904  | 7.024353  | -0.709292 |
| 124 | H | 1.948049  | 6.233142  | -2.212078 |
| 125 | O | 3.466292  | 7.106765  | -1.098777 |
| 126 | C | 3.440600  | 8.364809  | -1.732190 |
| 127 | H | 2.689197  | 9.022821  | -1.271288 |
| 128 | H | 3.188139  | 8.264934  | -2.798119 |
| 129 | C | 4.818022  | 8.978554  | -1.587910 |
| 130 | H | 5.068612  | 9.082405  | -0.521397 |
| 131 | H | 5.569506  | 8.314642  | -2.041506 |
| 132 | O | 4.795652  | 10.231273 | -2.228056 |
| 133 | C | 6.032543  | 10.899087 | -2.150643 |
| 134 | H | 5.925086  | 11.853469 | -2.669075 |
| 135 | H | 6.323660  | 11.090822 | -1.108215 |
| 136 | H | 6.834663  | 10.321118 | -2.631084 |

Table S4. Cartesian coordinates of the dimer of the open form of compound **5** optimized at the PBE0-D3(BJ) level.

|    |   |           |            |           |     |   |            |           |           |
|----|---|-----------|------------|-----------|-----|---|------------|-----------|-----------|
| 1  | C | 6.786623  | -8.206997  | -0.655187 | 54  | H | -4.468351  | 1.541406  | 0.163176  |
| 2  | C | 8.146537  | -7.947924  | -0.817025 | 55  | H | -4.307368  | 1.206694  | 1.902243  |
| 3  | C | 6.223468  | -9.444745  | -0.933691 | 56  | C | 0.330144   | 0.555892  | 0.652592  |
| 4  | C | 8.994107  | -8.956890  | -1.240160 | 57  | H | 0.826442   | 0.062236  | -0.193802 |
| 5  | C | 7.088119  | -10.452996 | -1.363791 | 58  | H | -0.646011  | 0.934054  | 0.331417  |
| 6  | H | 5.158260  | -9.628085  | -0.837894 | 59  | C | 1.186870   | 1.686434  | 1.164396  |
| 7  | C | 8.454707  | -10.218332 | -1.510508 | 60  | H | 0.705927   | 2.158136  | 2.034243  |
| 8  | H | 10.057700 | -8.774099  | -1.365788 | 61  | H | 2.155269   | 1.287972  | 1.502094  |
| 9  | H | 6.682795  | -11.433703 | -1.593759 | 62  | C | 7.025847   | -5.997720 | -0.122846 |
| 10 | H | 9.104359  | -11.020049 | -1.847764 | 63  | C | 6.588746   | -4.713011 | 0.169390  |
| 11 | N | 6.159337  | -7.038146  | -0.194066 | 64  | H | 5.528552   | -4.526349 | 0.288509  |
| 12 | C | 8.426654  | -6.504625  | -0.459020 | 65  | C | 7.403349   | -3.591207 | 0.281556  |
| 13 | C | 9.340229  | -6.434935  | 0.776971  | 66  | H | 8.482650   | -3.718808 | 0.245998  |
| 14 | H | 8.929160  | -7.029904  | 1.597972  | 67  | C | 6.968115   | -2.267420 | 0.455876  |
| 15 | H | 10.321908 | -6.846962  | 0.524475  | 68  | C | 7.966492   | -1.274119 | 0.596846  |
| 16 | H | 9.476163  | -5.412535  | 1.135709  | 69  | C | 5.543810   | -1.875409 | 0.487966  |
| 17 | C | 9.040516  | -5.764832  | -1.655674 | 70  | C | 7.633048   | 0.041062  | 0.782288  |
| 18 | H | 9.966642  | -6.264478  | -1.954463 | 71  | H | 9.015326   | -1.552299 | 0.574408  |
| 19 | H | 8.360921  | -5.767192  | -2.512123 | 72  | C | 5.282290   | -0.464585 | 0.707434  |
| 20 | H | 9.281848  | -4.728226  | -1.411595 | 73  | C | 6.273363   | 0.456081  | 0.854759  |
| 21 | C | 4.754716  | -6.950250  | 0.137044  | 74  | H | 4.236964   | -0.173006 | 0.748883  |
| 22 | H | 4.409931  | -7.937612  | 0.450658  | 75  | H | 6.055130   | 1.504509  | 1.039792  |
| 23 | H | 4.642752  | -6.279260  | 0.992207  | 76  | N | 8.682377   | 1.016353  | 0.919262  |
| 24 | C | 3.912476  | -6.437759  | -1.034134 | 77  | O | 8.358996   | 2.177907  | 1.148076  |
| 25 | H | 4.405278  | -5.589119  | -1.513321 | 78  | O | 9.844497   | 0.644753  | 0.795841  |
| 26 | H | 3.752993  | -7.216838  | -1.782075 | 79  | O | 4.609374   | -2.685688 | 0.334571  |
| 27 | N | 2.625301  | -5.993795  | -0.559608 | 80  | O | -6.363826  | -5.181104 | 0.224472  |
| 28 | C | 2.267975  | -4.750317  | -0.179664 | 81  | C | -7.663163  | -4.911829 | -0.244142 |
| 29 | C | 0.953551  | -4.889171  | 0.226642  | 82  | H | -7.637740  | -4.543275 | -1.282433 |
| 30 | H | 2.947790  | -3.908452  | -0.220596 | 83  | H | -8.161581  | -4.140780 | 0.361705  |
| 31 | N | 1.620734  | -6.865530  | -0.388615 | 84  | C | -8.456159  | -6.197651 | -0.174108 |
| 32 | N | 0.606721  | -6.199313  | 0.080025  | 85  | H | -7.959732  | -6.978046 | -0.773013 |
| 33 | C | 0.031961  | -3.842663  | 0.665765  | 86  | H | -8.493672  | -6.553760 | 0.867804  |
| 34 | C | -1.351922 | -4.062496  | 0.654263  | 87  | O | -9.744293  | -5.924382 | -0.664583 |
| 35 | C | 0.537339  | -2.601303  | 1.047136  | 88  | C | -10.573254 | -7.060389 | -0.681527 |
| 36 | C | -2.215658 | -3.023388  | 0.981936  | 89  | H | -10.156074 | -7.844184 | -1.334009 |
| 37 | H | -1.727997 | -5.046366  | 0.399557  | 90  | H | -10.678678 | -7.489613 | 0.327420  |
| 38 | C | -0.332455 | -1.564436  | 1.367592  | 91  | C | -11.926169 | -6.624389 | -1.198520 |
| 39 | H | 1.606086  | -2.415599  | 1.100351  | 92  | H | -12.352251 | -5.861945 | -0.529034 |
| 40 | C | -1.713305 | -1.752102  | 1.318355  | 93  | H | -11.803115 | -6.161656 | -2.192771 |
| 41 | O | -3.567669 | -3.114739  | 0.997127  | 94  | O | -12.748309 | -7.761093 | -1.272254 |
| 42 | O | 0.183047  | -0.354601  | 1.737427  | 95  | C | -14.061630 | -7.428966 | -1.629172 |
| 43 | O | -2.545177 | -0.724887  | 1.649983  | 96  | H | -14.106340 | -6.904387 | -2.597521 |
| 44 | C | -4.187964 | -4.341301  | 0.653842  | 97  | H | -14.628945 | -8.360189 | -1.711805 |
| 45 | H | -3.809348 | -4.720776  | -0.303365 | 98  | H | -14.543062 | -6.789799 | -0.872074 |
| 46 | H | -4.006469 | -5.097640  | 1.428156  | 99  | O | -2.631197  | 2.014217  | 0.999393  |
| 47 | C | -5.660523 | -4.006336  | 0.529388  | 100 | C | -2.927305  | 3.387057  | 1.074182  |
| 48 | H | -5.780459 | -3.254003  | -0.266951 | 101 | H | -3.391854  | 3.742871  | 0.140202  |
| 49 | H | -6.025434 | -3.561243  | 1.468833  | 102 | H | -3.630779  | 3.599881  | 1.894701  |
| 50 | C | -3.350427 | -0.212126  | 0.594970  | 103 | C | -1.617512  | 4.110894  | 1.304068  |
| 51 | H | -2.781521 | -0.205442  | -0.343852 | 104 | H | -0.888039  | 3.787794  | 0.544847  |
| 52 | H | -4.240552 | -0.836520  | 0.453406  | 105 | H | -1.216125  | 3.830624  | 2.288823  |
| 53 | C | -3.768475 | 1.193205   | 0.940830  | 106 | O | -1.859460  | 5.495107  | 1.213858  |



|     |   |           |            |           |     |   |           |           |          |
|-----|---|-----------|------------|-----------|-----|---|-----------|-----------|----------|
| 107 | C | -0.690829 | 6.250521   | 1.434008  | 160 | C | 0.987077  | -8.070113 | 2.962563 |
| 108 | H | 0.162557  | 5.823535   | 0.888661  | 161 | H | 1.777579  | -7.718514 | 2.294862 |
| 109 | H | -0.424904 | 6.279481   | 2.500636  | 162 | H | 0.413220  | -8.835977 | 2.438848 |
| 110 | C | -0.917631 | 7.653137   | 0.911822  | 163 | N | 0.097900  | -6.971659 | 3.238081 |
| 111 | H | -1.272071 | 7.599060   | -0.130557 | 164 | C | 0.443156  | -5.731717 | 3.640478 |
| 112 | H | -1.692411 | 8.171434   | 1.500077  | 165 | C | -0.762085 | -5.107411 | 3.879159 |
| 113 | O | 0.315909  | 8.324127   | 0.987612  | 166 | H | 1.467055  | -5.387033 | 3.696107 |
| 114 | C | 0.265274  | 9.622012   | 0.453952  | 167 | N | -1.232854 | -7.128287 | 3.224902 |
| 115 | H | 1.287209  | 10.006506  | 0.429453  | 168 | N | -1.756504 | -6.000312 | 3.601338 |
| 116 | H | -0.123691 | 9.621512   | -0.575755 | 169 | C | -0.999329 | -3.731583 | 4.302377 |
| 117 | H | -0.365920 | 10.289185  | 1.061442  | 170 | C | -2.300415 | -3.226732 | 4.307232 |
| 118 | O | 1.361774  | 2.611329   | 0.118763  | 171 | C | 0.063354  | -2.908462 | 4.663262 |
| 119 | C | 2.183899  | 3.673243   | 0.530773  | 172 | C | -2.532590 | -1.895939 | 4.634523 |
| 120 | H | 1.780570  | 4.140249   | 1.442691  | 173 | H | -3.110469 | -3.890587 | 4.036806 |
| 121 | H | 3.201025  | 3.324007   | 0.763525  | 174 | C | -0.165596 | -1.577279 | 5.004911 |
| 122 | C | 2.231756  | 4.728434   | -0.550144 | 175 | H | 1.088982  | -3.264853 | 4.662931 |
| 123 | H | 1.206744  | 4.999809   | -0.850169 | 176 | C | -1.464414 | -1.046315 | 4.983797 |
| 124 | H | 2.750504  | 4.357303   | -1.448403 | 177 | O | -3.776886 | -1.348546 | 4.655739 |
| 125 | O | 2.903071  | 5.826074   | 0.013640  | 178 | O | 0.915792  | -0.868403 | 5.417856 |
| 126 | C | 2.853271  | 6.983261   | -0.784924 | 179 | O | -1.658626 | 0.247810  | 5.366673 |
| 127 | H | 1.814810  | 7.323879   | -0.907230 | 180 | C | -4.811029 | -2.148457 | 4.119748 |
| 128 | H | 3.273606  | 6.791138   | -1.785230 | 181 | H | -4.502874 | -2.572464 | 3.158361 |
| 129 | C | 3.661195  | 8.053791   | -0.086232 | 182 | H | -5.061239 | -2.970509 | 4.804220 |
| 130 | H | 3.280350  | 8.203119   | 0.935365  | 183 | C | -6.037305 | -1.291033 | 3.904139 |
| 131 | H | 4.711343  | 7.732852   | -0.006062 | 184 | H | -5.857451 | -0.581386 | 3.083529 |
| 132 | O | 3.542916  | 9.231718   | -0.854434 | 185 | H | -6.283796 | -0.710018 | 4.805510 |
| 133 | C | 4.385687  | 10.248226  | -0.388292 | 186 | C | -2.296858 | 1.101355  | 4.413396 |
| 134 | H | 4.240626  | 11.121148  | -1.031422 | 187 | H | -1.879237 | 0.939750  | 3.413787 |
| 135 | H | 4.155352  | 10.535185  | 0.649658  | 188 | H | -3.367453 | 0.877175  | 4.377494 |
| 136 | H | 5.446231  | 9.952438   | -0.427976 | 189 | C | -2.110793 | 2.528643  | 4.847205 |
| 137 | C | 2.865867  | -10.744960 | 4.066292  | 190 | H | -2.839011 | 3.156601  | 4.306353 |
| 138 | C | 4.197662  | -11.128616 | 3.919948  | 191 | H | -2.330663 | 2.621221  | 5.922767 |
| 139 | C | 1.830957  | -11.663819 | 4.169958  | 192 | C | 1.129597  | 0.439853  | 4.896534 |
| 140 | C | 4.529620  | -12.471608 | 3.880876  | 193 | H | 0.494671  | 0.626826  | 4.030342 |
| 141 | C | 2.178366  | -13.014842 | 4.130350  | 194 | H | 0.905558  | 1.192001  | 5.657443 |
| 142 | H | 0.794414  | -11.359790 | 4.272387  | 195 | C | 2.589358  | 0.493671  | 4.495090 |
| 143 | C | 3.506229  | -13.417346 | 3.990107  | 196 | H | 3.216782  | 0.100291  | 5.311519 |
| 144 | H | 5.563218  | -12.788107 | 3.770311  | 197 | H | 2.744974  | -0.148030 | 3.612722 |
| 145 | H | 1.395668  | -13.763252 | 4.208803  | 198 | C | 4.025615  | -8.782043 | 3.949726 |
| 146 | H | 3.746514  | -14.475706 | 3.963818  | 199 | C | 4.197165  | -7.399347 | 3.936461 |
| 147 | N | 2.803471  | -9.340686  | 4.091078  | 200 | H | 3.329478  | -6.762390 | 4.049847 |
| 148 | C | 5.064675  | -9.893695  | 3.827804  | 201 | C | 5.408528  | -6.732395 | 3.805448 |
| 149 | C | 6.070025  | -9.853237  | 4.989100  | 202 | H | 6.319357  | -7.314641 | 3.682075 |
| 150 | H | 6.699754  | -8.961418  | 4.950062  | 203 | C | 5.599349  | -5.337434 | 3.812017 |
| 151 | H | 5.557923  | -9.869214  | 5.954621  | 204 | C | 6.918607  | -4.859850 | 3.643053 |
| 152 | H | 6.720927  | -10.730780 | 4.933386  | 205 | C | 4.499924  | -4.367599 | 3.983855 |
| 153 | C | 5.772362  | -9.849668  | 2.466390  | 206 | C | 7.192469  | -3.517103 | 3.665278 |
| 154 | H | 5.045967  | -9.899265  | 1.651842  | 207 | H | 7.735046  | -5.560443 | 3.498542 |
| 155 | H | 6.368884  | -8.942550  | 2.346084  | 208 | C | 4.875540  | -2.966845 | 4.009138 |
| 156 | H | 6.441334  | -10.709351 | 2.367991  | 209 | C | 6.161351  | -2.555165 | 3.862966 |
| 157 | C | 1.576989  | -8.592997  | 4.281525  | 210 | H | 4.067932  | -2.254559 | 4.144807 |
| 158 | H | 0.857784  | -9.232244  | 4.796138  | 211 | H | 6.426216  | -1.503946 | 3.878368 |
| 159 | H | 1.788537  | -7.752528  | 4.947231  | 212 | N | 8.539444  | -3.072241 | 3.455993 |

|     |   |            |           |           |     |   |          |          |           |
|-----|---|------------|-----------|-----------|-----|---|----------|----------|-----------|
| 213 | O | 8.782800   | -1.880397 | 3.602432  | 266 | H | 7.031988 | 4.201132 | 0.433744  |
| 214 | O | 9.389261   | -3.904448 | 3.134134  | 267 | H | 5.437979 | 4.652861 | -0.226417 |
| 215 | O | 3.310124   | -4.712221 | 4.110428  | 268 | O | 6.664559 | 6.239504 | 0.296411  |
| 216 | O | -7.071902  | -2.193433 | 3.583119  | 269 | C | 7.212314 | 6.401073 | -0.983328 |
| 217 | C | -8.042783  | -1.682540 | 2.706358  | 270 | H | 7.543964 | 7.439390 | -1.072670 |
| 218 | H | -7.614396  | -1.493543 | 1.708223  | 271 | H | 8.077683 | 5.739166 | -1.144095 |
| 219 | H | -8.461671  | -0.733414 | 3.073982  | 272 | H | 6.474583 | 6.198536 | -1.776443 |
| 220 | C | -9.127433  | -2.734754 | 2.588323  |     |   |          |          |           |
| 221 | H | -8.655007  | -3.729388 | 2.538093  |     |   |          |          |           |
| 222 | H | -9.774641  | -2.724002 | 3.479020  |     |   |          |          |           |
| 223 | O | -9.863763  | -2.461326 | 1.423814  |     |   |          |          |           |
| 224 | C | -11.005455 | -3.275706 | 1.297883  |     |   |          |          |           |
| 225 | H | -10.736657 | -4.341923 | 1.331727  |     |   |          |          |           |
| 226 | H | -11.722059 | -3.076033 | 2.110487  |     |   |          |          |           |
| 227 | C | -11.645767 | -2.949854 | -0.033448 |     |   |          |          |           |
| 228 | H | -11.749753 | -1.856456 | -0.128374 |     |   |          |          |           |
| 229 | H | -11.000916 | -3.300898 | -0.853829 |     |   |          |          |           |
| 230 | O | -12.903410 | -3.577845 | -0.073418 |     |   |          |          |           |
| 231 | C | -13.564768 | -3.351915 | -1.289651 |     |   |          |          |           |
| 232 | H | -12.994523 | -3.738260 | -2.148303 |     |   |          |          |           |
| 233 | H | -14.526656 | -3.869261 | -1.245568 |     |   |          |          |           |
| 234 | H | -13.750451 | -2.279389 | -1.457796 |     |   |          |          |           |
| 235 | O | -0.800939  | 2.959228  | 4.565976  |     |   |          |          |           |
| 236 | C | -0.588711  | 4.303416  | 4.913759  |     |   |          |          |           |
| 237 | H | -1.326878  | 4.957749  | 4.419884  |     |   |          |          |           |
| 238 | H | -0.688492  | 4.455891  | 5.999895  |     |   |          |          |           |
| 239 | C | 0.797191   | 4.679728  | 4.436399  |     |   |          |          |           |
| 240 | H | 0.913474   | 4.331743  | 3.398597  |     |   |          |          |           |
| 241 | H | 1.572165   | 4.177463  | 5.033440  |     |   |          |          |           |
| 242 | O | 0.911183   | 6.078755  | 4.509959  |     |   |          |          |           |
| 243 | C | 2.119068   | 6.547038  | 3.959847  |     |   |          |          |           |
| 244 | H | 2.239483   | 6.200340  | 2.921637  |     |   |          |          |           |
| 245 | H | 2.983772   | 6.187044  | 4.539521  |     |   |          |          |           |
| 246 | C | 2.077859   | 8.058266  | 3.990034  |     |   |          |          |           |
| 247 | H | 1.270316   | 8.420678  | 3.336525  |     |   |          |          |           |
| 248 | H | 1.870521   | 8.397334  | 5.018586  |     |   |          |          |           |
| 249 | O | 3.328864   | 8.525397  | 3.548894  |     |   |          |          |           |
| 250 | C | 3.405157   | 9.923363  | 3.577498  |     |   |          |          |           |
| 251 | H | 4.396796   | 10.208818 | 3.216148  |     |   |          |          |           |
| 252 | H | 2.641442   | 10.392725 | 2.937076  |     |   |          |          |           |
| 253 | H | 3.279041   | 10.318386 | 4.598639  |     |   |          |          |           |
| 254 | O | 2.921481   | 1.831285  | 4.207227  |     |   |          |          |           |
| 255 | C | 4.137889   | 1.942330  | 3.513709  |     |   |          |          |           |
| 256 | H | 4.958471   | 1.451361  | 4.060832  |     |   |          |          |           |
| 257 | H | 4.066848   | 1.452935  | 2.530896  |     |   |          |          |           |
| 258 | C | 4.423798   | 3.415234  | 3.298795  |     |   |          |          |           |
| 259 | H | 4.925830   | 3.856018  | 4.173657  |     |   |          |          |           |
| 260 | H | 3.467094   | 3.939791  | 3.162715  |     |   |          |          |           |
| 261 | O | 5.222632   | 3.538088  | 2.147337  |     |   |          |          |           |
| 262 | C | 5.610111   | 4.872270  | 1.900297  |     |   |          |          |           |
| 263 | H | 6.351188   | 5.206079  | 2.642678  |     |   |          |          |           |
| 264 | H | 4.743843   | 5.546796  | 1.950963  |     |   |          |          |           |
| 265 | C | 6.207524   | 4.926109  | 0.512534  |     |   |          |          |           |

Table S5. Rate constant of compounds **1–6** in THF solution at different temperatures.

| Compound | $k \times 10^2 / \text{s}^{-1}$ in THF |     |      |      |      |      |
|----------|----------------------------------------|-----|------|------|------|------|
|          | T / K                                  |     |      |      |      |      |
|          | 288                                    | 293 | 298  | 303  | 308  | 313  |
| <b>1</b> | 1.2                                    | 2.2 | 4.3  | 8.1  | 15.0 | 23.1 |
| <b>2</b> | 1.0                                    | 2.0 | 3.9  | 7.1  | 12.3 | 20.9 |
| <b>3</b> | 1.9                                    | 3.5 | 6.0  | 10.1 | 18.3 | 29.7 |
| <b>4</b> | 1.5                                    | 3.0 | 5.7  | 10.2 | 19.1 | 32.4 |
| <b>5</b> | 1.3                                    | 2.7 | 5.0  | 8.7  | 15.4 | 27.7 |
| <b>6</b> | 3.5                                    | 6.2 | 10.8 | 19.0 | 32.3 | 57.5 |

Table S6. Activation parameters of the bleaching reaction of compounds **1–6** in THF solution.

| Compound | $\Delta H^\ddagger$ (kJ mol <sup>-1</sup> ) | $\Delta S^\ddagger$ (J mol <sup>-1</sup> K <sup>-1</sup> ) | $\Delta G^\ddagger_{298 \text{ K}}$ (kJ mol <sup>-1</sup> ) | $E_a$ (kJ mol <sup>-1</sup> ) |
|----------|---------------------------------------------|------------------------------------------------------------|-------------------------------------------------------------|-------------------------------|
| <b>1</b> | 87.04 ± 0.78                                | 23.77 ± 2.62                                               | 79.96 ± 1.56                                                | 89.54 ± 0.78                  |
| <b>2</b> | 87.99 ± 0.56                                | 23.08 ± 1.80                                               | 81.11 ± 1.09                                                | 90.48 ± 0.55                  |
| <b>3</b> | 79.99 ± 0.18                                | 0.14 ± 0.58                                                | 79.94 ± 0.35                                                | 82.48 ± 0.16                  |
| <b>4</b> | 89.56 ± 0.43                                | 31.60 ± 1.47                                               | 81.14 ± 0.87                                                | 92.06 ± 0.44                  |
| <b>5</b> | 87.46 ± 0.72                                | 23.42 ± 2.34                                               | 80.48 ± 1.42                                                | 89.96 ± 0.74                  |
| <b>6</b> | 80.73 ± 0.43                                | 7.66 ± 1.45                                                | 78.45 ± 0.86                                                | 83.22 ± 0.43                  |

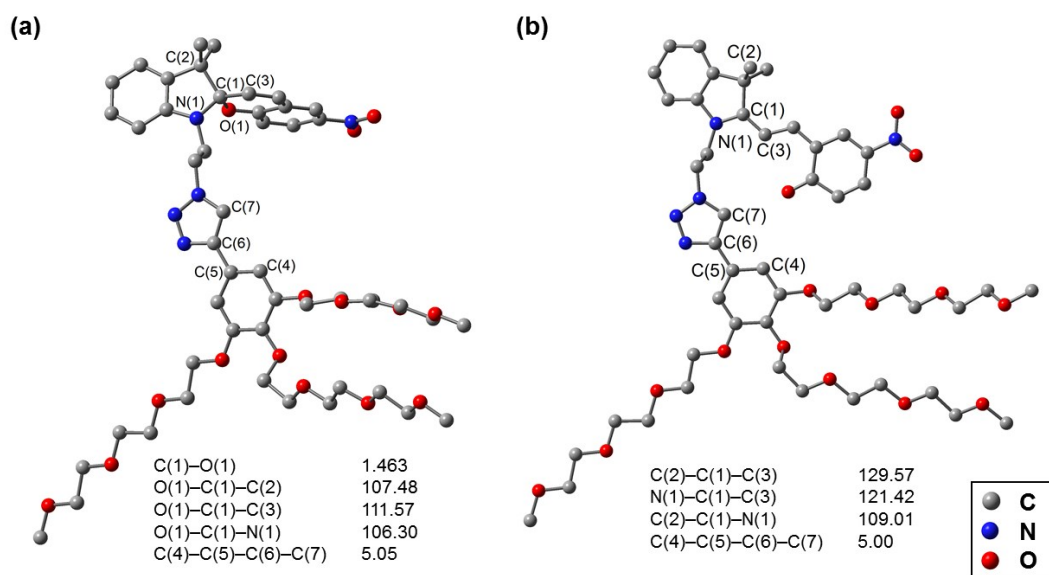

Figure S1. Ground-state geometries of (a) the closed form and (b) the open form of compound **5** optimized at the CAM-B3LYP /6-31G(d,p) level, with selected structural parameters. The bond lengths and bond angles are in Angstroms and degrees, respectively. All hydrogen atoms are omitted for clarity.

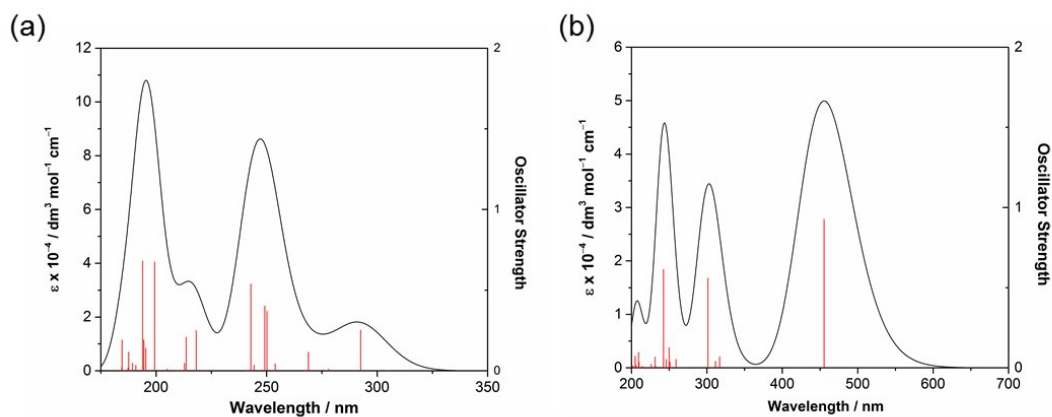

Figure S2. Simulated UV-vis spectra of (a) the closed form and (b) the open form of compound **5** computed by TDDFT/PCM in THF.

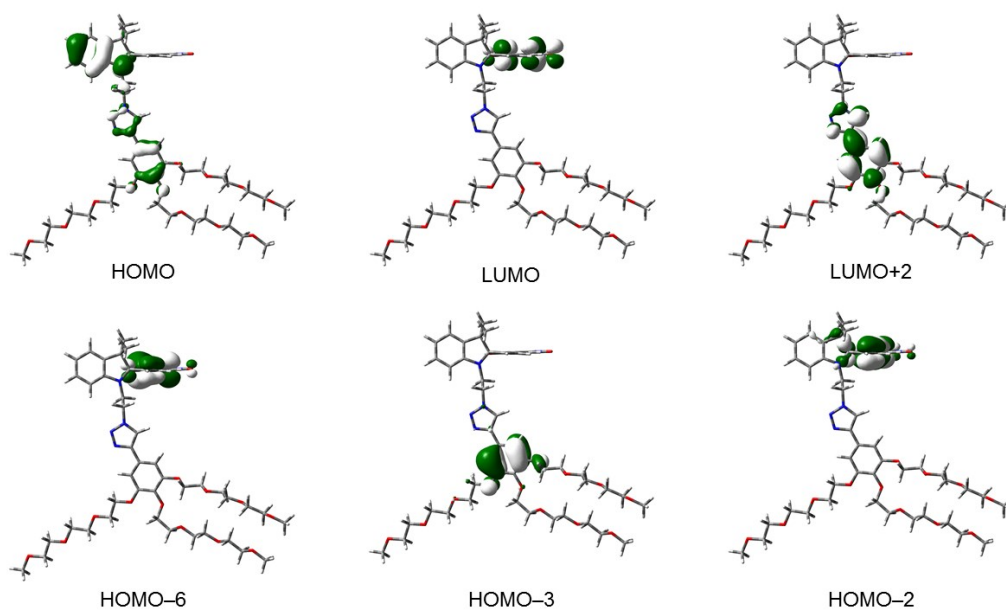

Figure S3. Spatial plots (isovalue = 0.03) of selected molecular orbitals of the closed form of **5** at the ground-state geometry optimized at the CAM-B3LYP level.

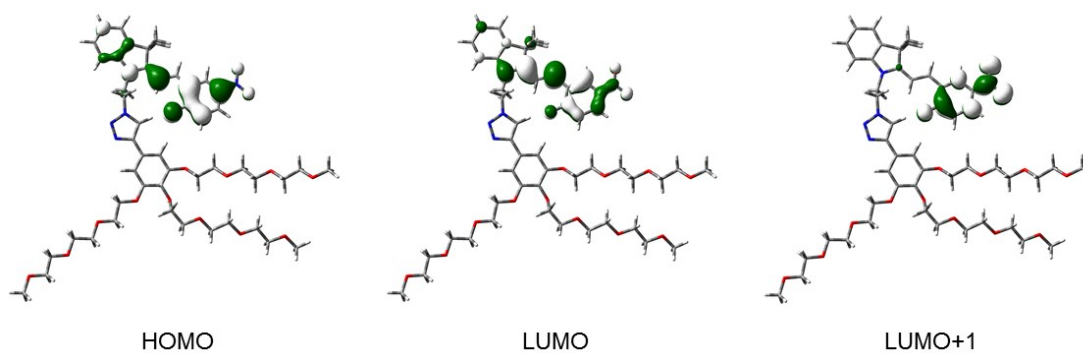

Figure S4. Spatial plots (isovalue = 0.03) of selected molecular orbitals of the open form of **5** at the ground-state geometry optimized at the CAM-B3LYP level.

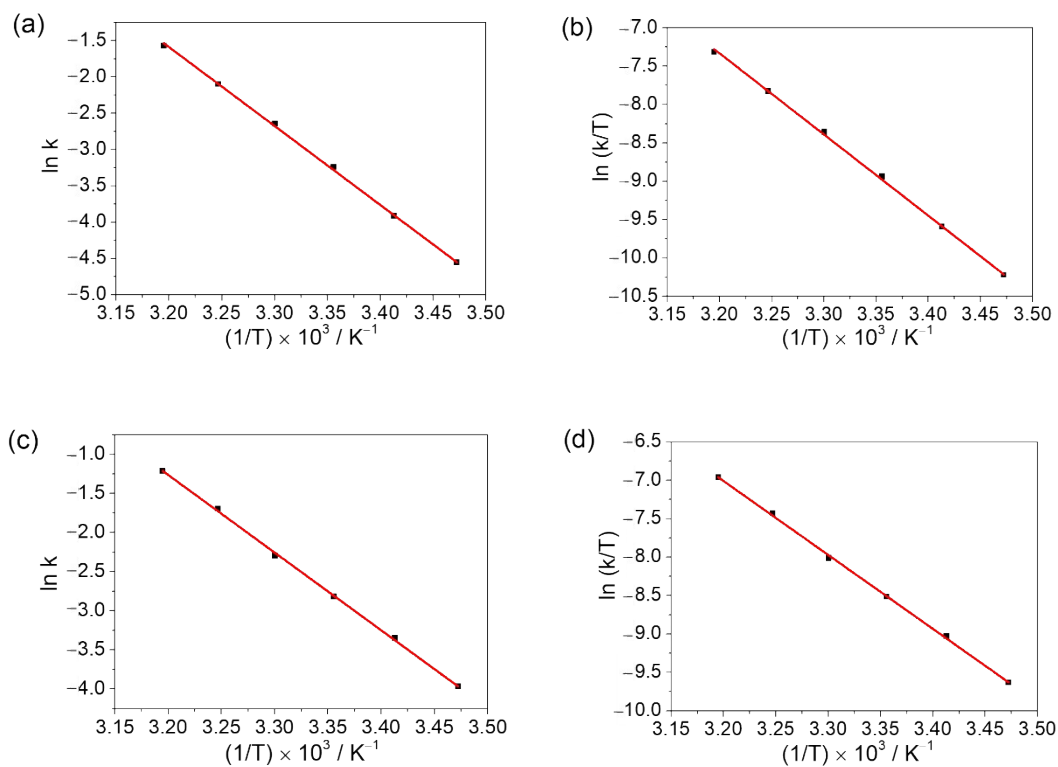

Figure S5. (a) Arrhenius and (b) Eyring plots for the thermal bleaching reaction of compound **2**; (c) Arrhenius and (d) Eyring plots for the thermal bleaching reaction of compound **3** in THF solution (conc =  $4 \times 10^{-5}$  M).

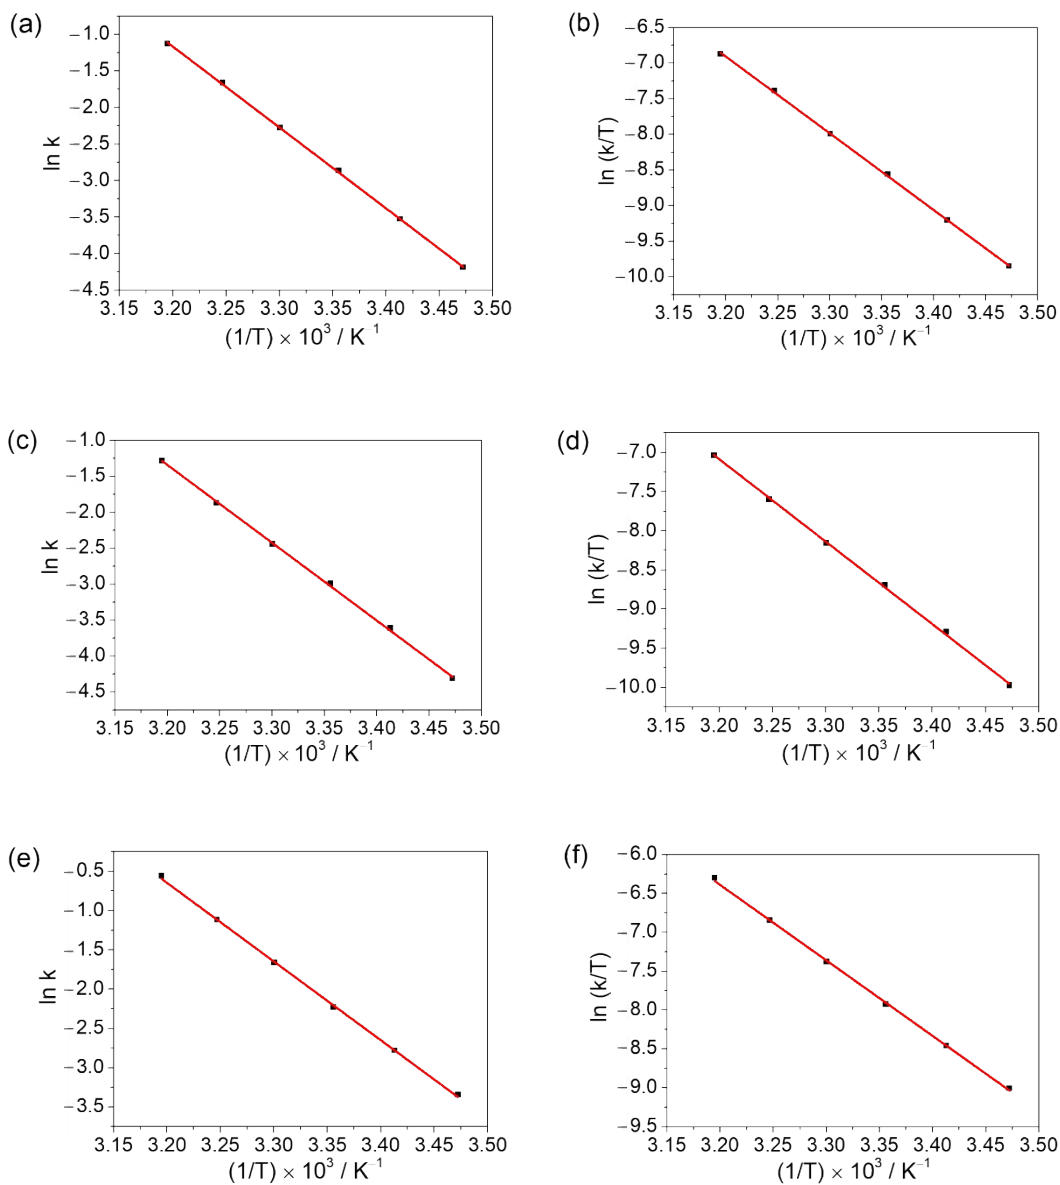

Figure S6. (a) Arrhenius and (b) Eyring plots for the thermal bleaching reaction of compound **4**; (c) Arrhenius and (d) Eyring plots for the thermal bleaching reaction of compound **5**; (e) Arrhenius and (f) Eyring plots for the thermal bleaching reaction of compound **6** in THF solution (conc =  $4 \times 10^{-5}$  M).

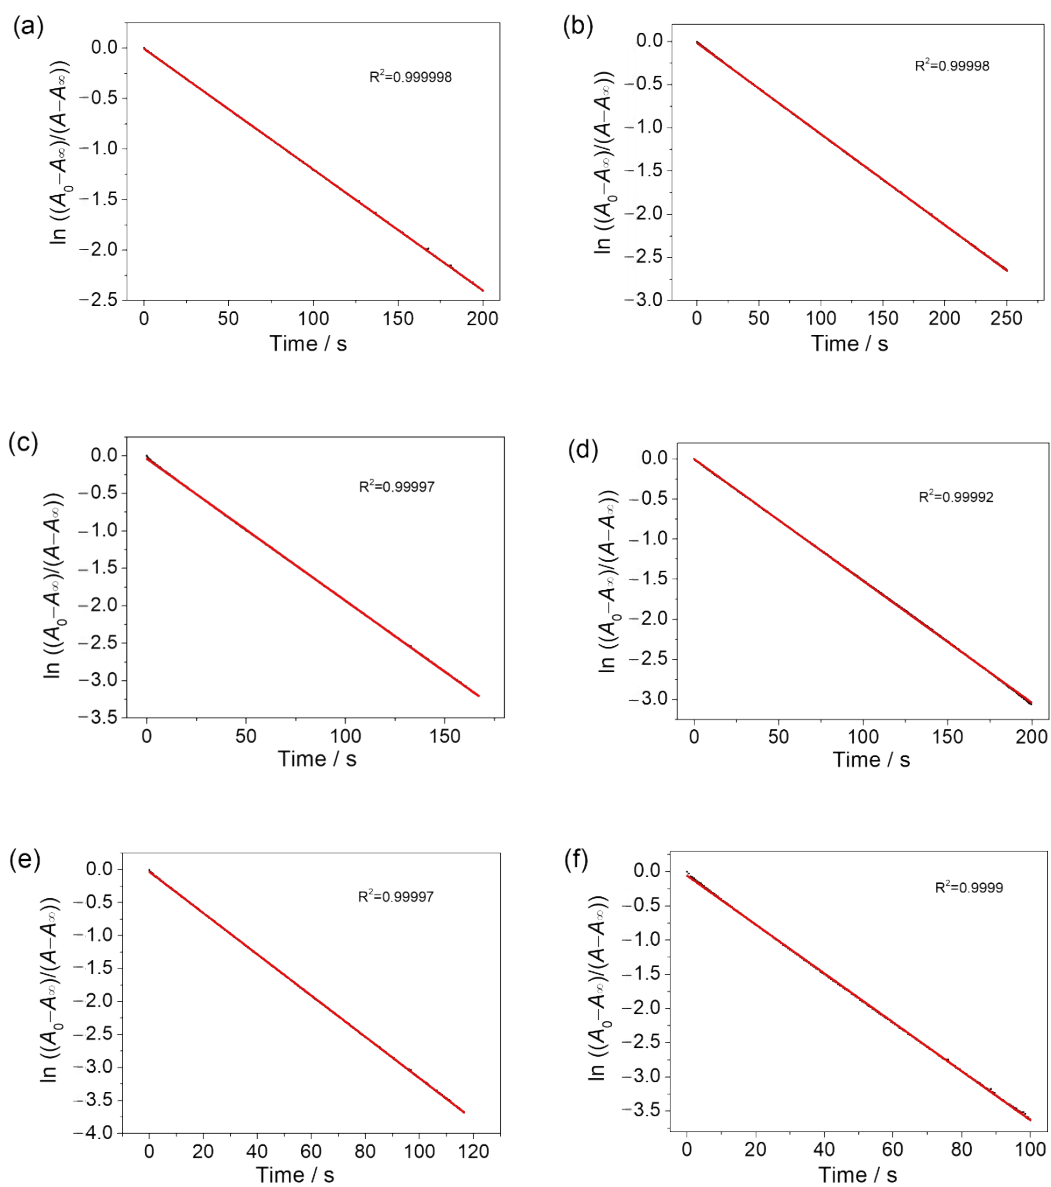

Figure S7. Plots of  $\ln \left[ \frac{(A - A_\infty)}{(A_0 - A_\infty)} \right]$  against  $t$  from the bleaching reaction of compounds **1–6** (a–f) in THF solution at 288 K (conc =  $4 \times 10^{-5}$  M).



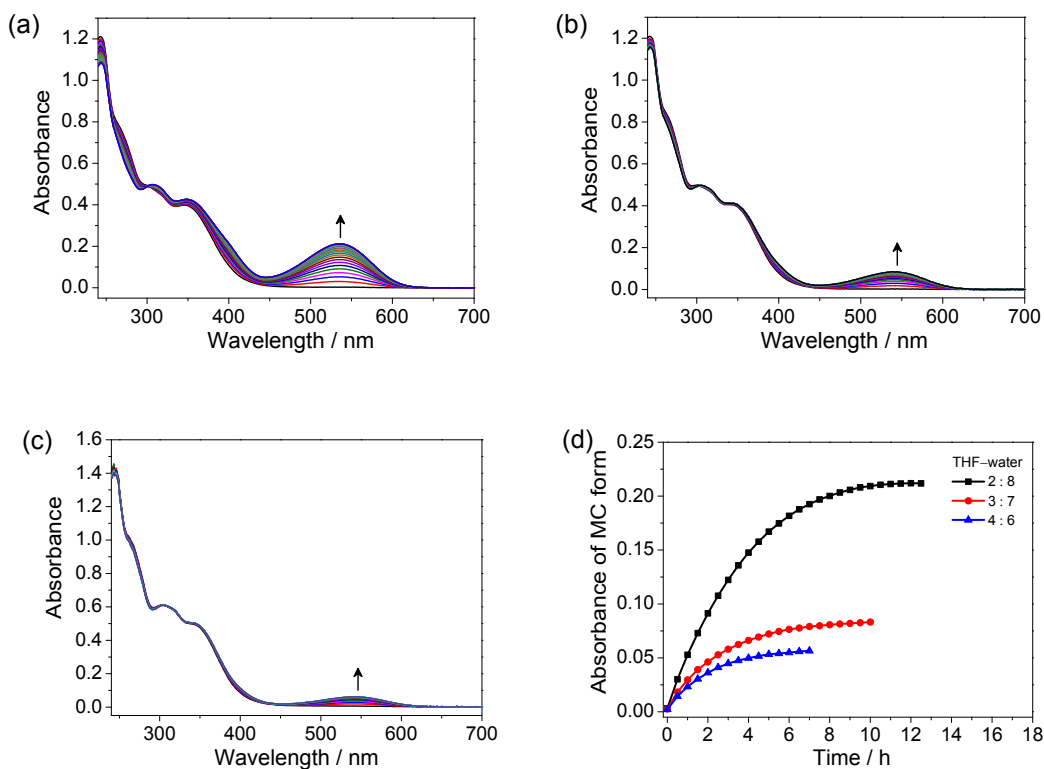

Figure S8. Time-dependent UV-vis absorption spectral changes of the closed form of compound **1** in (a) THF-water (2 : 8 v/v), (b) THF-water (3 : 7 v/v) and (c) THF-water (4 : 6 v/v) solutions in the dark. The arrows indicate the spectral changes with time. The time intervals between every two spectra were 0.5 hour; (d) absorbance traces of compound **1** in THF-water mixed solutions at the absorption maximum with time at 293 K ( $[1] = 4 \times 10^{-5} \text{ M}$ ).

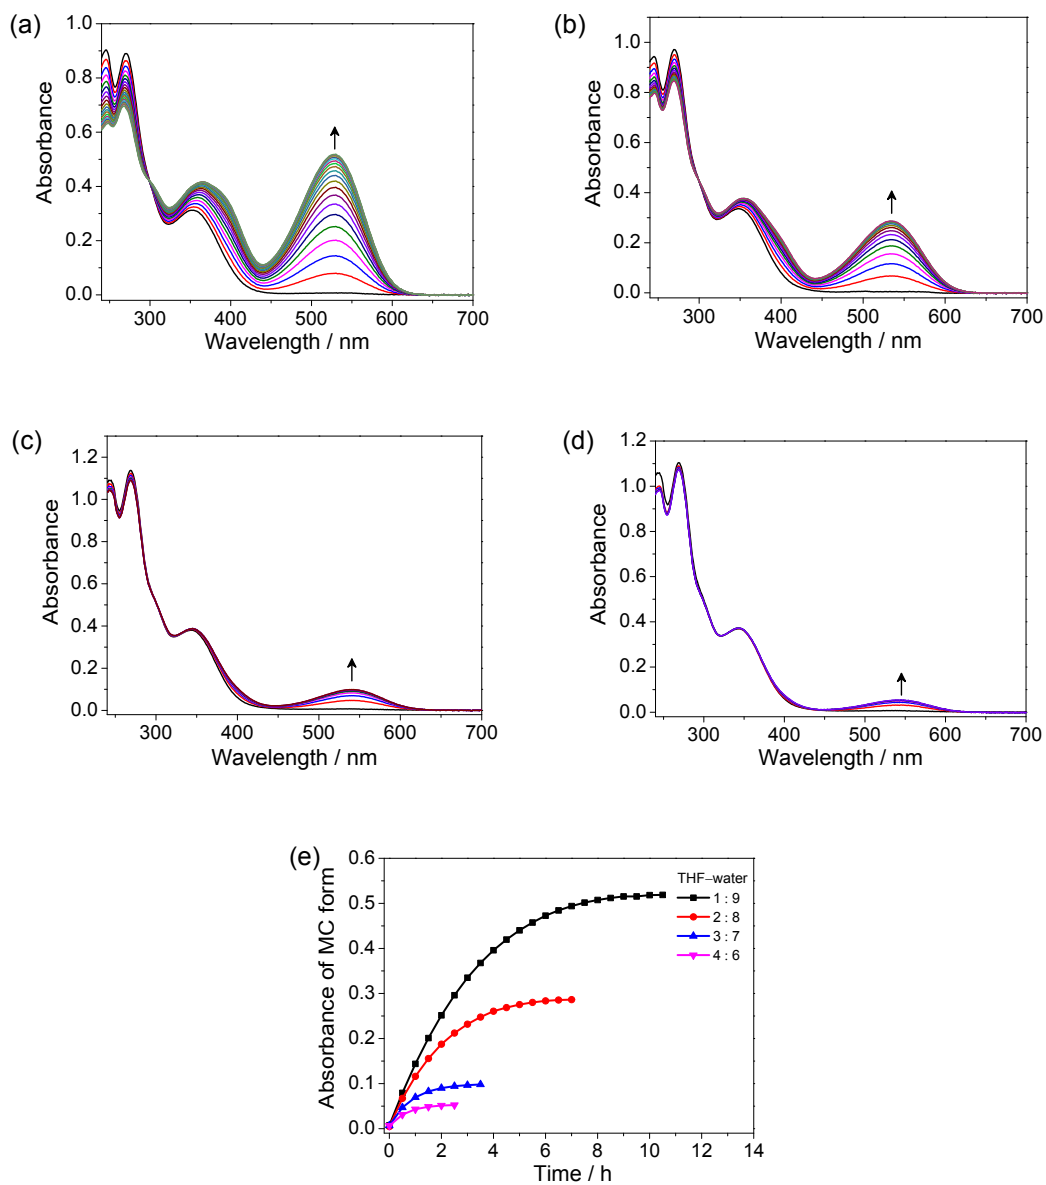

Figure S9. Time-dependent UV-vis absorption spectral changes of the closed form of compound **2** in (a) THF-water (1 : 9 v/v), (b) THF-water (2 : 8 v/v), (c) THF-water (3 : 7 v/v) and (d) THF-water (4 : 6 v/v) solutions in the dark. The arrows indicate the spectral changes with time. The time intervals between every two spectra were 0.5 hour; (e) absorbance traces of compound **2** in THF-water mixed solutions at the absorption maximum with time at 293 K ( $[2] = 4 \times 10^{-5}$  M).

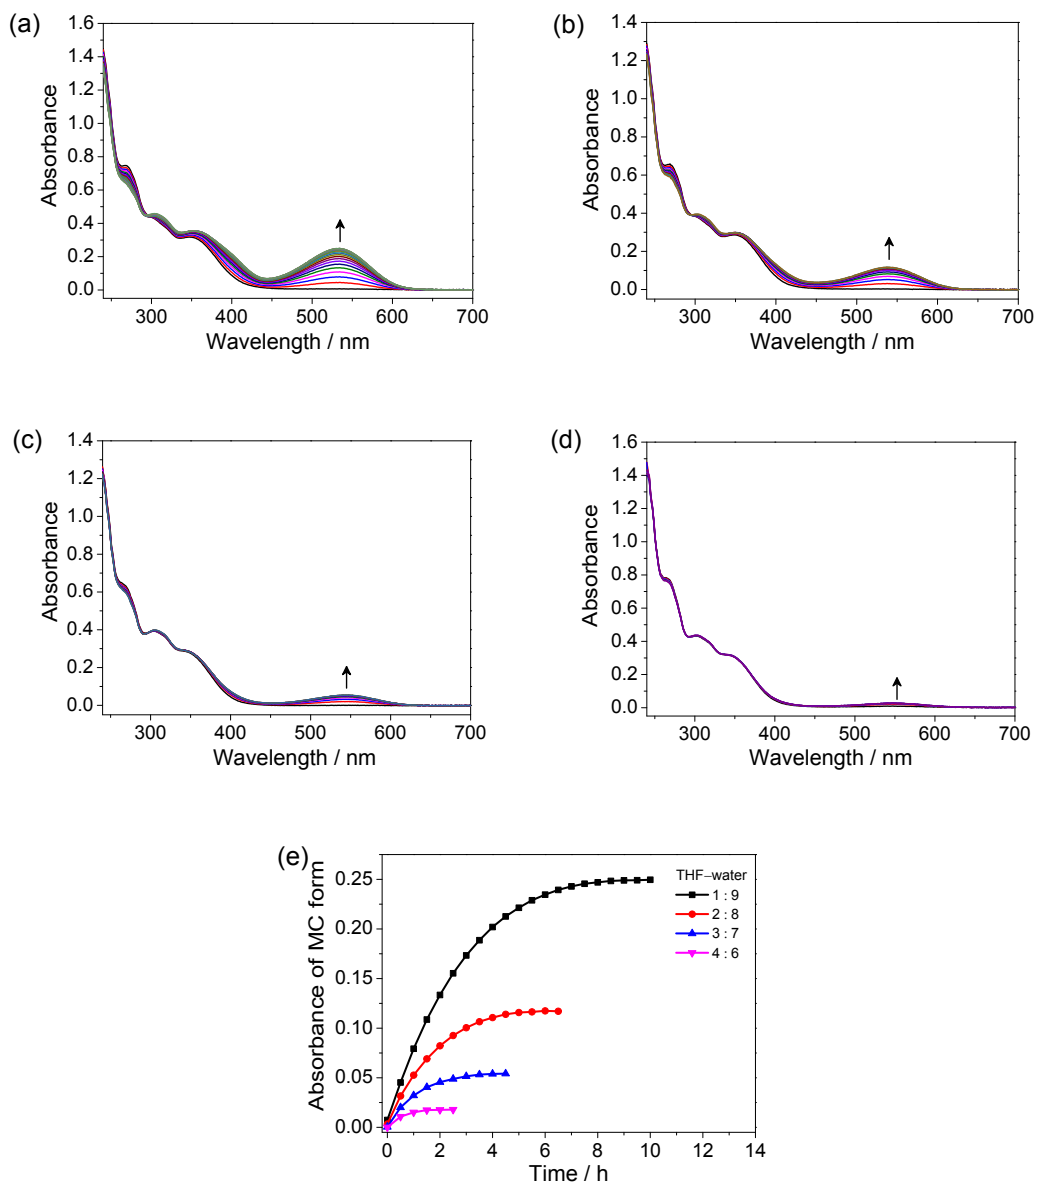

Figure S10. Time-dependent UV-vis absorption spectral changes of the closed form of compound **3** in (a) THF-water (1 : 9 v/v), (b) THF-water (2 : 8 v/v), (c) THF-water (3 : 7 v/v) and (d) THF-water (4 : 6 v/v) solutions in the dark. The arrows indicate the spectral changes with time. The time intervals between every two spectra were 0.5 hour; (e) absorbance traces of compound **3** in THF-water mixed solutions at the absorption maximum with time at 293 K ( $[3] = 4 \times 10^{-5} \text{ M}$ ).

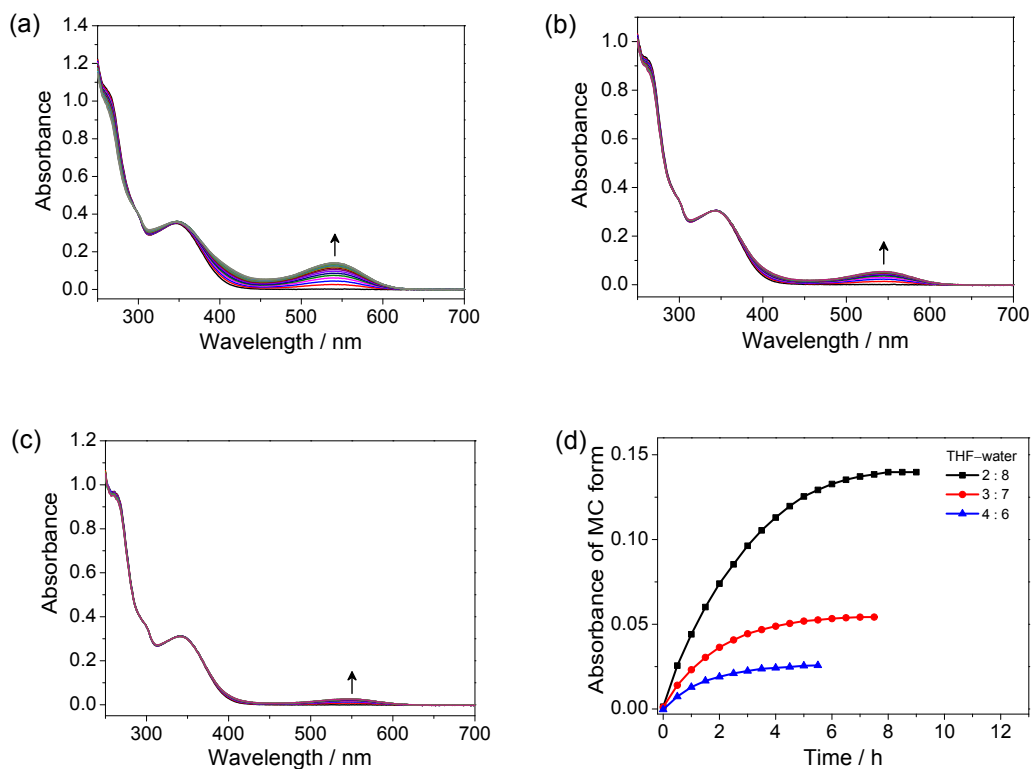

Figure S11. Time-dependent UV-vis absorption spectral changes of the closed form of compound **4** in (a) THF-water (2 : 8 v/v), (b) THF-water (3 : 7 v/v) and (c) THF-water (4 : 6 v/v) solutions in the dark. The arrows indicate the spectral changes with time. The time intervals between every two spectra were 0.5 hour; (d) absorbance traces of compound **4** in THF-water mixed solutions at the absorption maximum with time at 293 K ( $[4] = 4 \times 10^{-5}$  M).

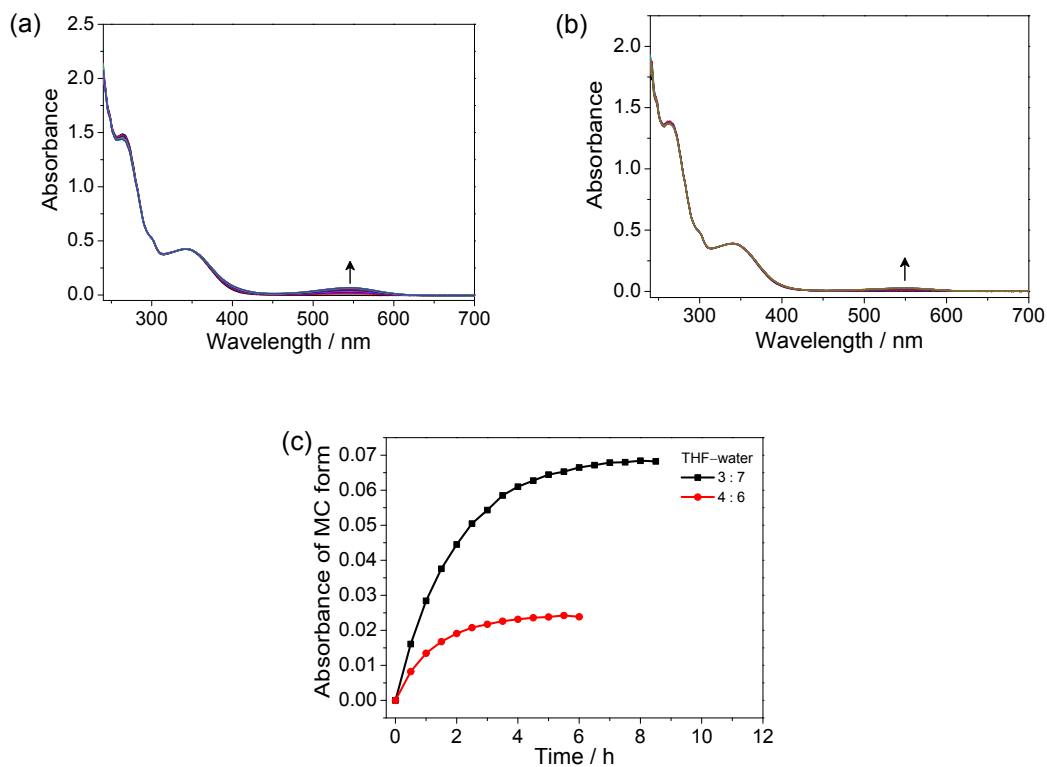

Figure S12. Time-dependent UV-vis absorption spectral changes of the closed form of compound **6** in (a) THF-water (3 : 7 v/v) and (b) THF-water (4 : 6 v/v) solutions in the dark. The arrows indicate the spectral changes with time. The time intervals between every two spectra were 0.5 hour; (c) absorbance traces of compound **6** in THF-water mixed solutions at the absorption maximum with time at 293 K ( $[6] = 4 \times 10^{-5}$  M).

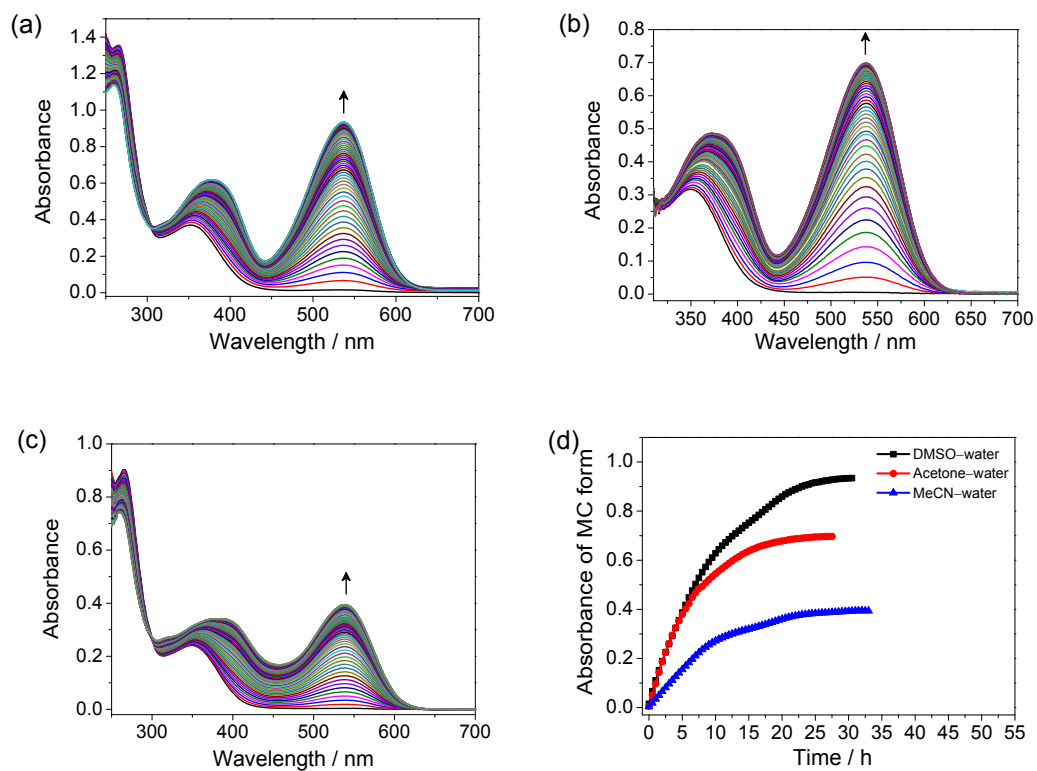

Figure S13. Time-dependent UV-vis absorption spectral changes of the closed form of compound **5** in (a) DMSO-water (1 : 4 v/v), (b) acetone-water (1 : 4 v/v) and (c) MeCN-water (1 : 4 v/v) solutions in the dark. The arrows indicate the spectral changes with time. The time intervals between every two spectra were 0.5 hour; (d) absorbance traces of compound **5** in mixed solutions at the absorption maximum with time at 293 K ( $[5] = 4 \times 10^{-5}$  M).

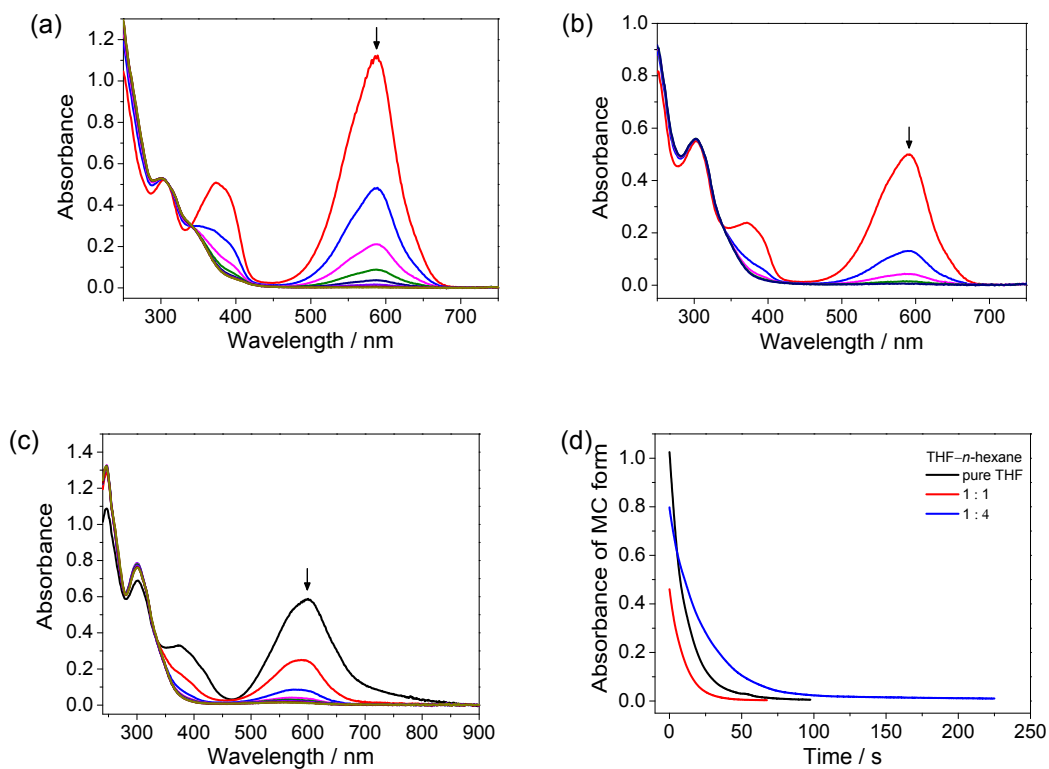

Figure S14. Time-dependent UV-vis absorption spectral changes of the open form of compound **1** in (a) THF, (b) THF-*n*-hexane (1 : 1 v/v) and (c) THF-*n*-hexane (1 : 4 v/v) solutions after excitation at 365 nm at 293 K. The arrows indicate the spectral changes with time. The time intervals between every two spectra were 30 seconds; (d) Decay traces at the absorption maximum with time at 293 K ( $[1] = 4 \times 10^{-5}$  M).

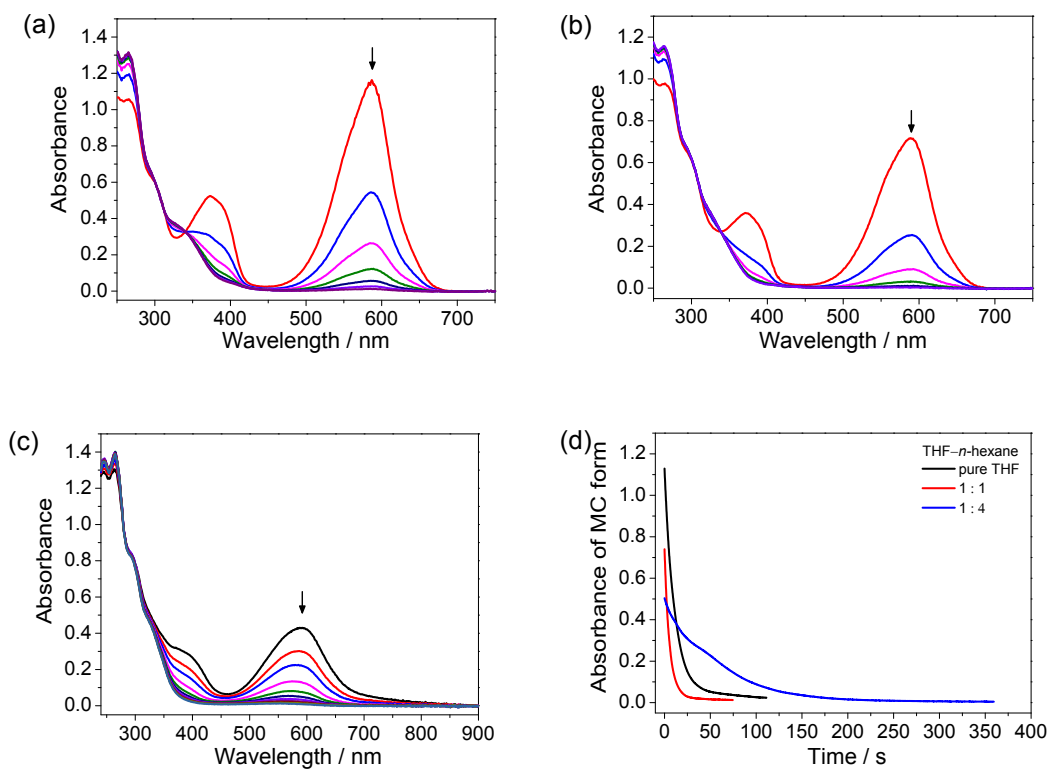

Figure S15. Time-dependent UV-vis absorption spectral changes of the open form of compound **2** in (a) THF, (b) THF-*n*-hexane (1 : 1 v/v) and (c) THF-*n*-hexane (1 : 4 v/v) solutions after excitation at 365 nm at 293 K. The arrows indicate the spectral changes with time. The time intervals between every two spectra were 30 seconds; (d) Decay traces at the absorption maximum with time at 293 K ( $[2] = 4 \times 10^{-5}$  M).



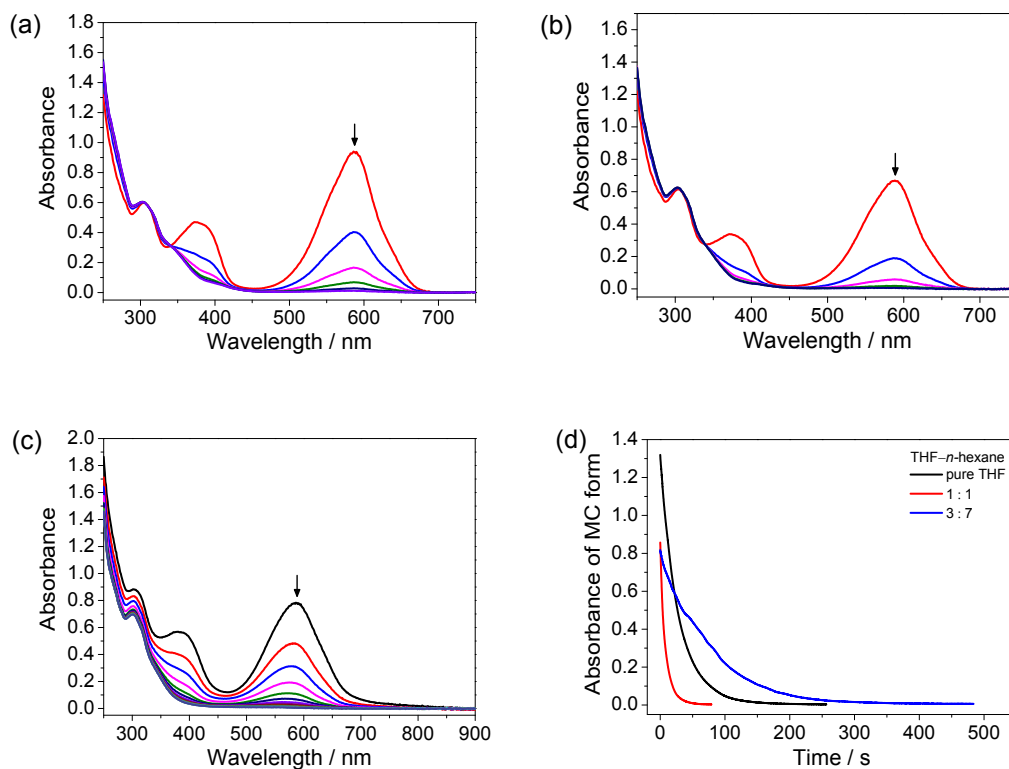

Figure S16. Time-dependent UV-vis absorption spectral changes of the open form of compound **3** in (a) THF, (b) THF-*n*-hexane (1 : 1 v/v) and (c) THF-*n*-hexane (3 : 7 v/v) solutions after excitation at 365 nm at 293 K. The arrows indicate the spectral changes with time. The time intervals between every two spectra were 30 seconds; (d) Decay traces at the absorption maximum with time at 293 K ( $[3] = 4 \times 10^{-5}$  M).

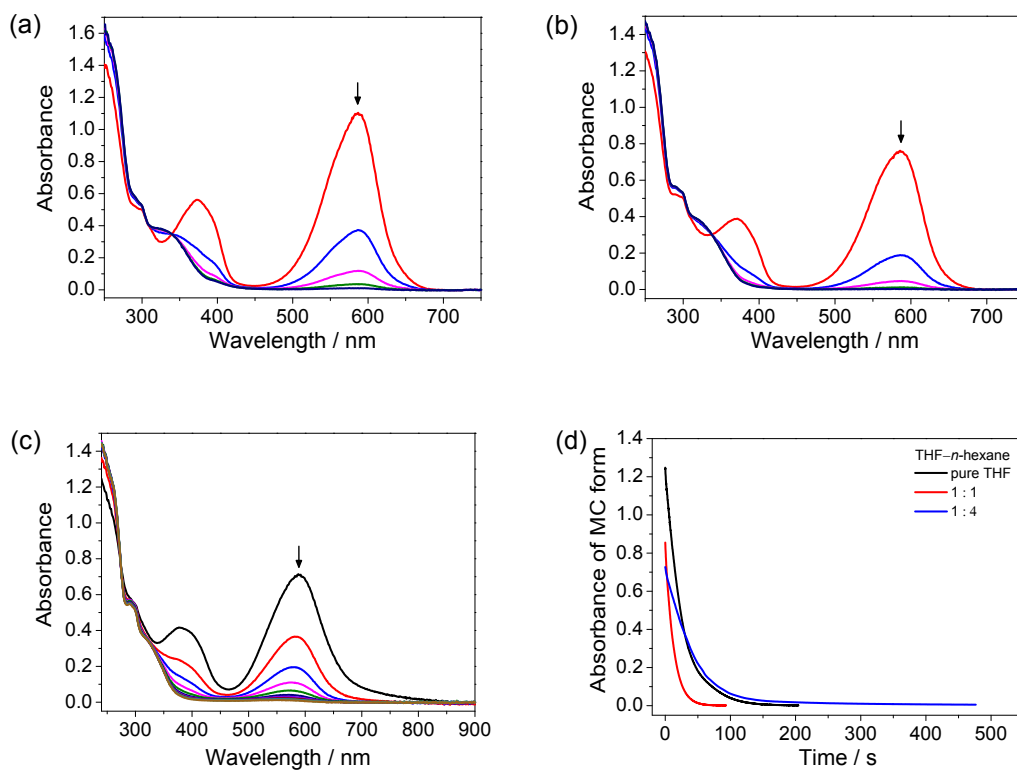

Figure S17. Time-dependent UV-vis absorption spectral changes of the open form of compound **4** in (a) THF, (b) THF-*n*-hexane (1 : 1 v/v) and (c) THF-*n*-hexane (1 : 4 v/v) solutions after excitation at 365 nm at 293 K. The arrows indicate the spectral changes with time. The time intervals between every two spectra were 30 seconds; (d) Decay traces at the absorption maximum with time at 293 K ( $[4] = 4 \times 10^{-5}$  M).

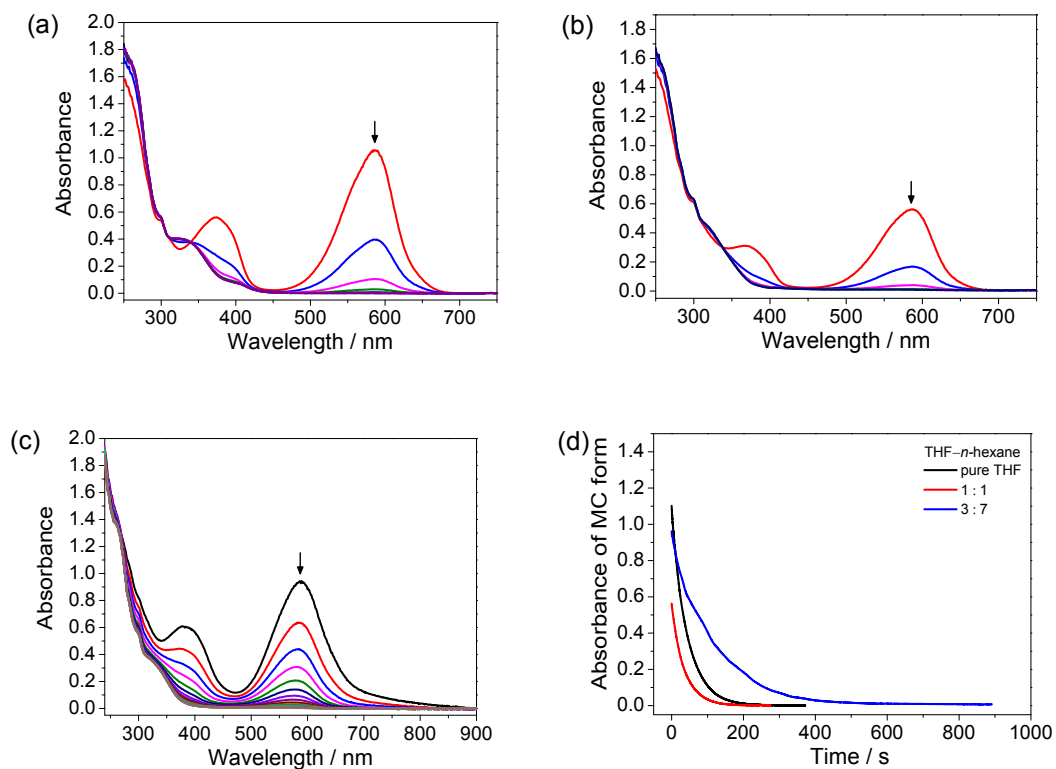

Figure S18. Time-dependent UV-vis absorption spectral changes of the open form of compound **6** in (a) THF, (b) THF-*n*-hexane (1 : 1 v/v) and (c) THF-*n*-hexane (3 : 7 v/v) solutions after excitation at 365 nm at 293 K. The arrows indicate the spectral changes with time. The time intervals between every two spectra were 30 seconds; (d) Decay traces at the absorption maximum with time at 293 K ( $[6] = 4 \times 10^{-5}$  M).

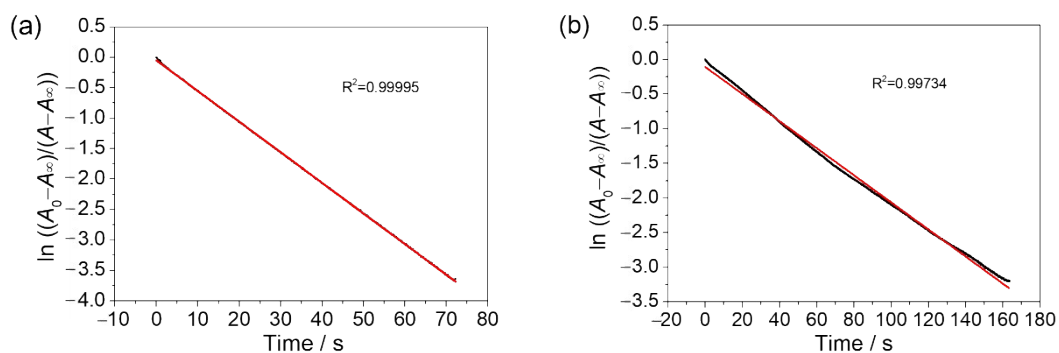

Figure S19. Plots of  $\ln [(A - A_\infty)/(A_0 - A_\infty)]$  against  $t$  from the bleaching reaction of compound **5** in (a) THF and (b) THF-*n*-hexane (1 : 4 v/v) at 298 K ( $[5] = 4 \times 10^{-5}$  M).

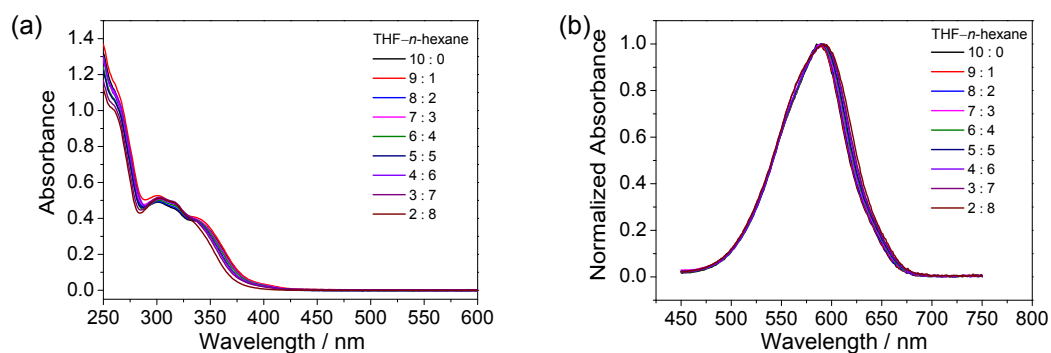

Figure S20. (a) UV-Vis absorption spectra of compound **1** in closed form and (b) normalized UV-vis absorption spectra of compound **1** after irradiation with UV light in THF solutions upon increasing *n*-hexane content from 0 to 80 % ( $[1] = 4 \times 10^{-5}$  M).

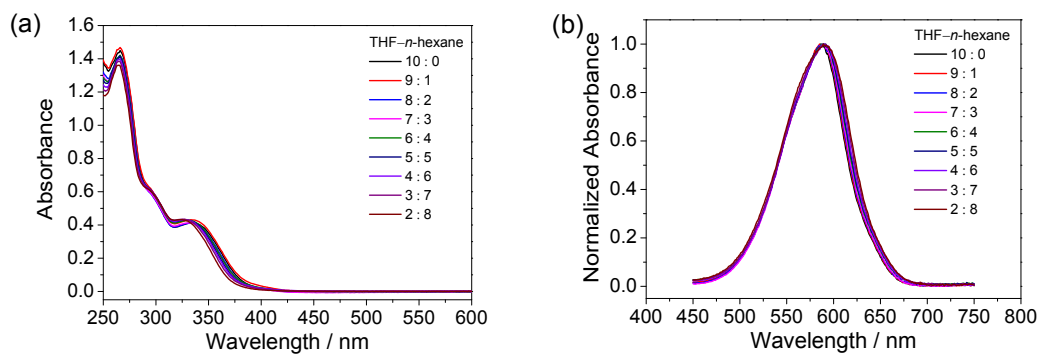

Figure S21. (a) UV–Vis absorption spectra of compound **2** in closed form and (b) normalized UV–vis absorption spectra of compound **2** after irradiation with UV light in THF solutions upon increasing *n*-hexane content from 0 to 80 % ( $[2] = 4 \times 10^{-5}$  M).

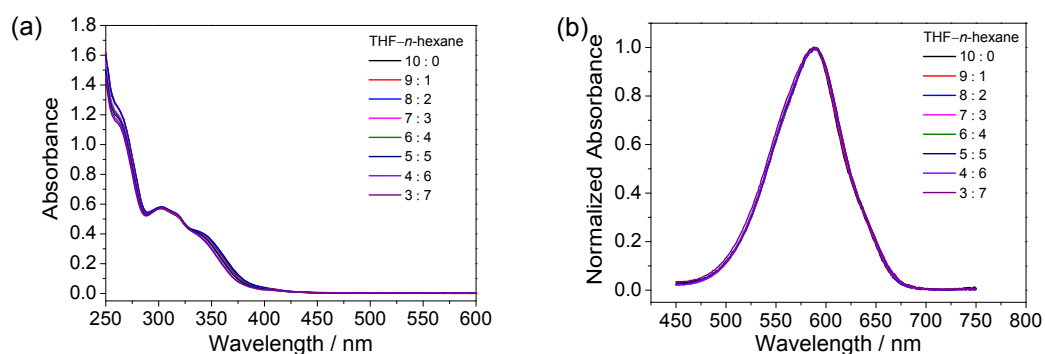

Figure S22. (a) UV–Vis absorption spectra of compound **3** in closed form and (b) normalized UV–vis absorption spectra of compound **3** after irradiation with UV light in THF solutions upon increasing *n*-hexane content from 0 to 70 % ( $[3] = 4 \times 10^{-5}$  M).

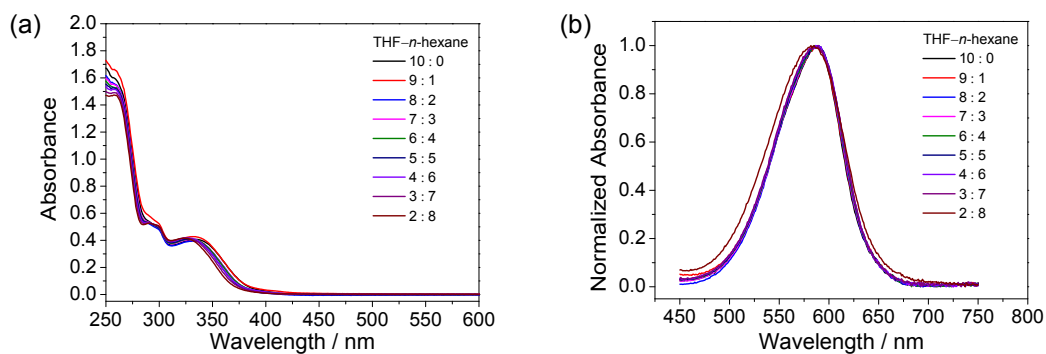

Figure S23. (a) UV–Vis absorption spectra of compound **4** in closed form and (b) normalized UV–vis absorption spectra of compound **4** after irradiation with UV light in THF solutions upon increasing *n*-hexane content from 0 to 80 % ( $[4] = 4 \times 10^{-5}$  M).

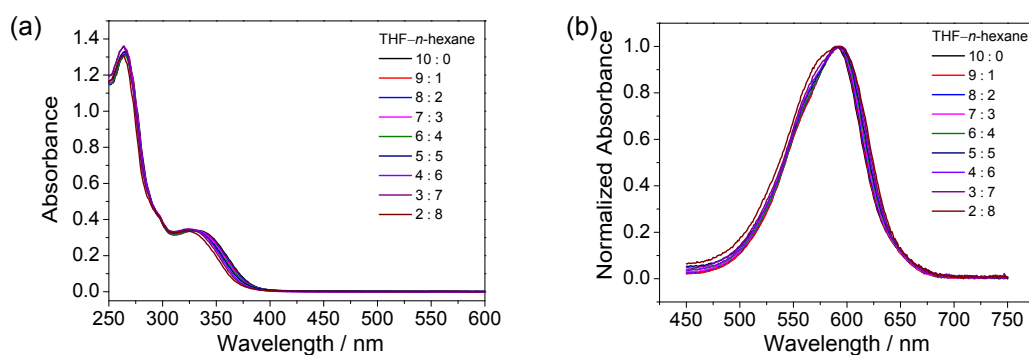

Figure S24. (a) UV–Vis absorption spectra of compound **5** in closed form and (b) normalized UV–vis absorption spectra of compound **5** after irradiation with UV light in THF solutions upon increasing *n*-hexane content from 0 to 80 % ( $[5] = 4 \times 10^{-5}$  M).

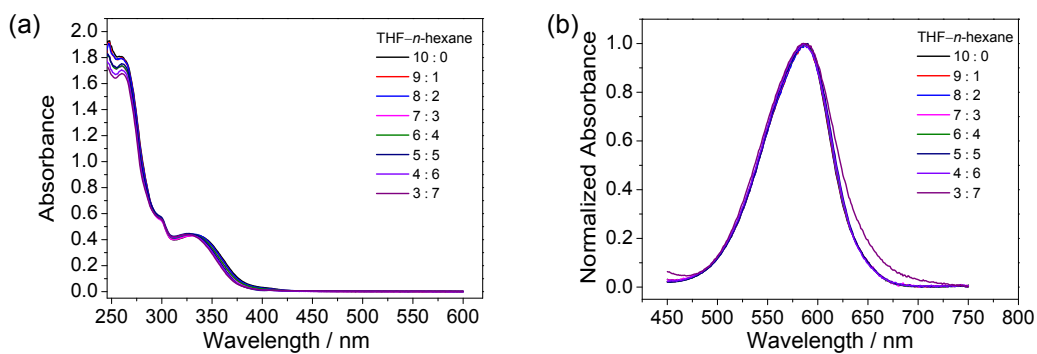

Figure S25. (a) UV–Vis absorption spectra of compound **6** in closed form and (b) normalized UV–vis absorption spectra of compound **6** after irradiation with UV light in THF solutions upon increasing *n*-hexane content from 0 to 70 % ([**6**] =  $4 \times 10^{-5}$  M).

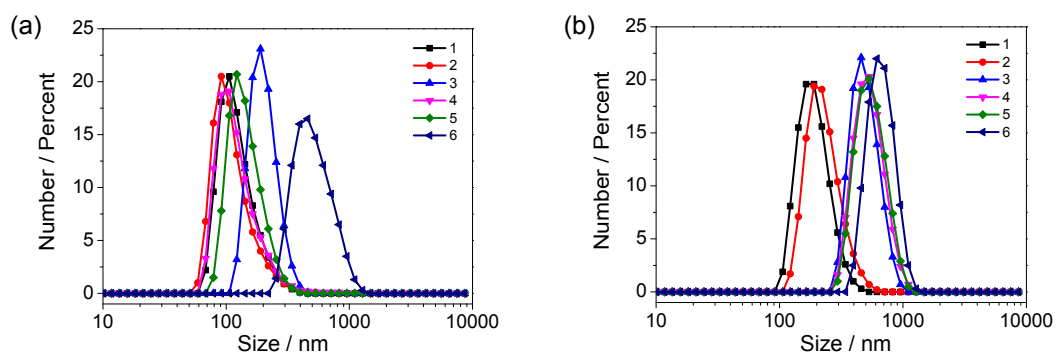

Figure S26. DLS results of compounds **1–6** in THF–*n*-hexane (1 : 4 v/v) for compounds **1**, **2**, **4** and **5** and THF–*n*-hexane (3 : 7 v/v) for compounds **3** and **6** (a) before and (b) after UV irradiation (conc =  $4 \times 10^{-5}$  M).

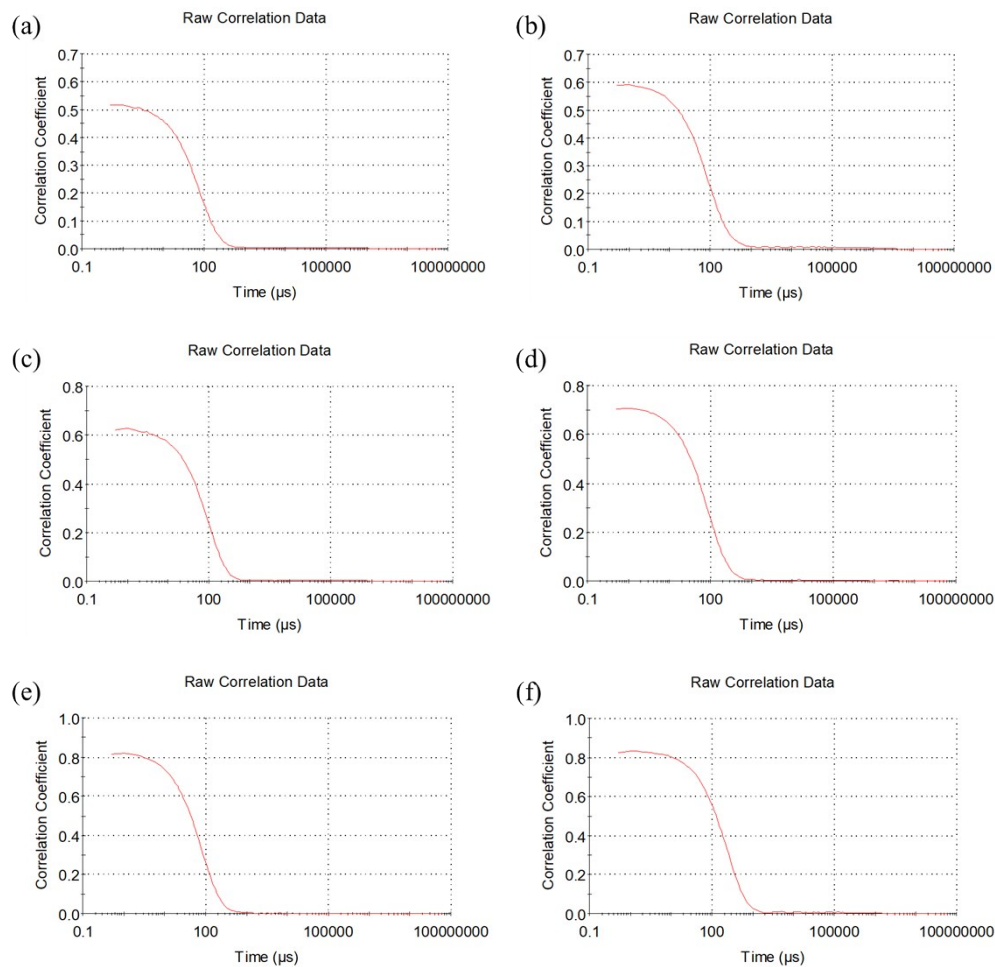

Figure S27. The autocorrelation function of the DLS results of compounds **1–6** (a–f) in THF–*n*-hexane (1 : 4 v/v) for compounds **1**, **2**, **4** and **5** and THF–*n*-hexane (3 : 7 v/v) for compounds **3** and **6** before UV irradiation (conc =  $4 \times 10^{-5}$  M).



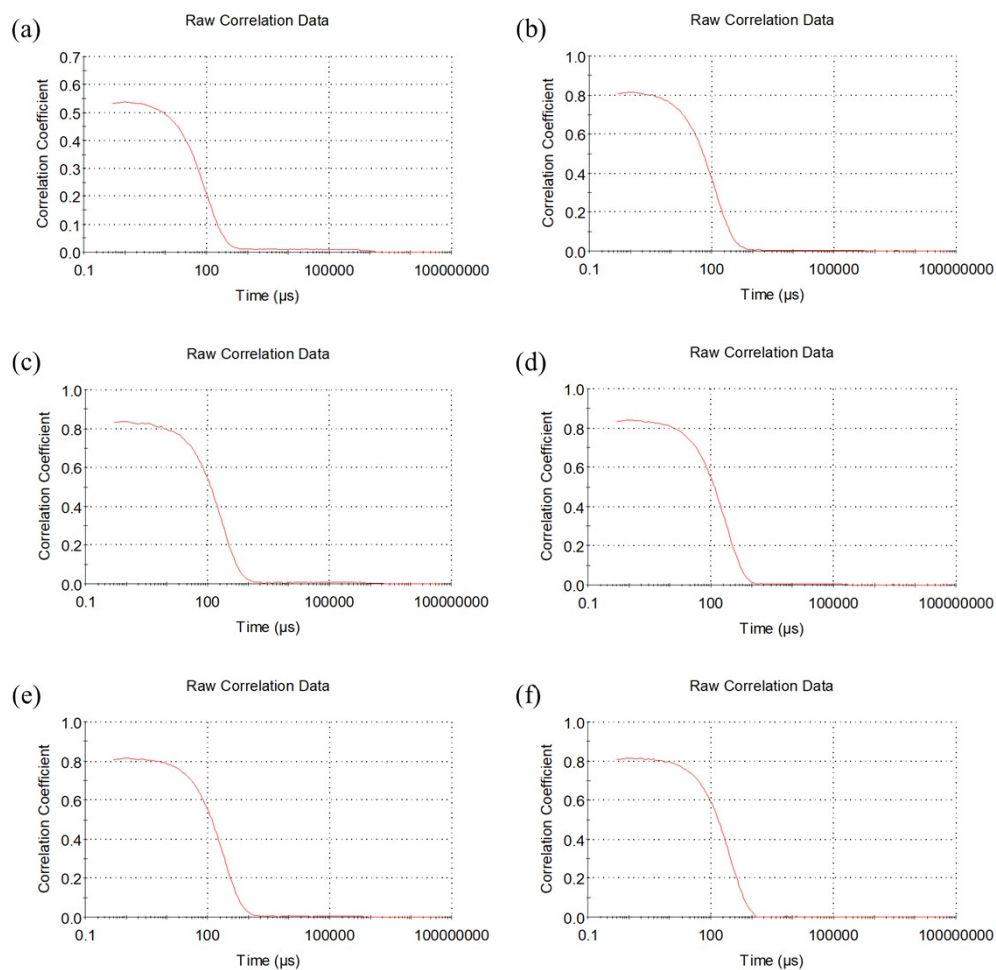

Figure S28. The autocorrelation function of the DLS results of compounds **1–6** (a–f) in THF–*n*-hexane (1 : 4 v/v) for compounds **1**, **2**, **4** and **5** and THF–*n*-hexane (3 : 7 v/v) for compounds **3** and **6** after UV irradiation (conc =  $4 \times 10^{-5}$  M).

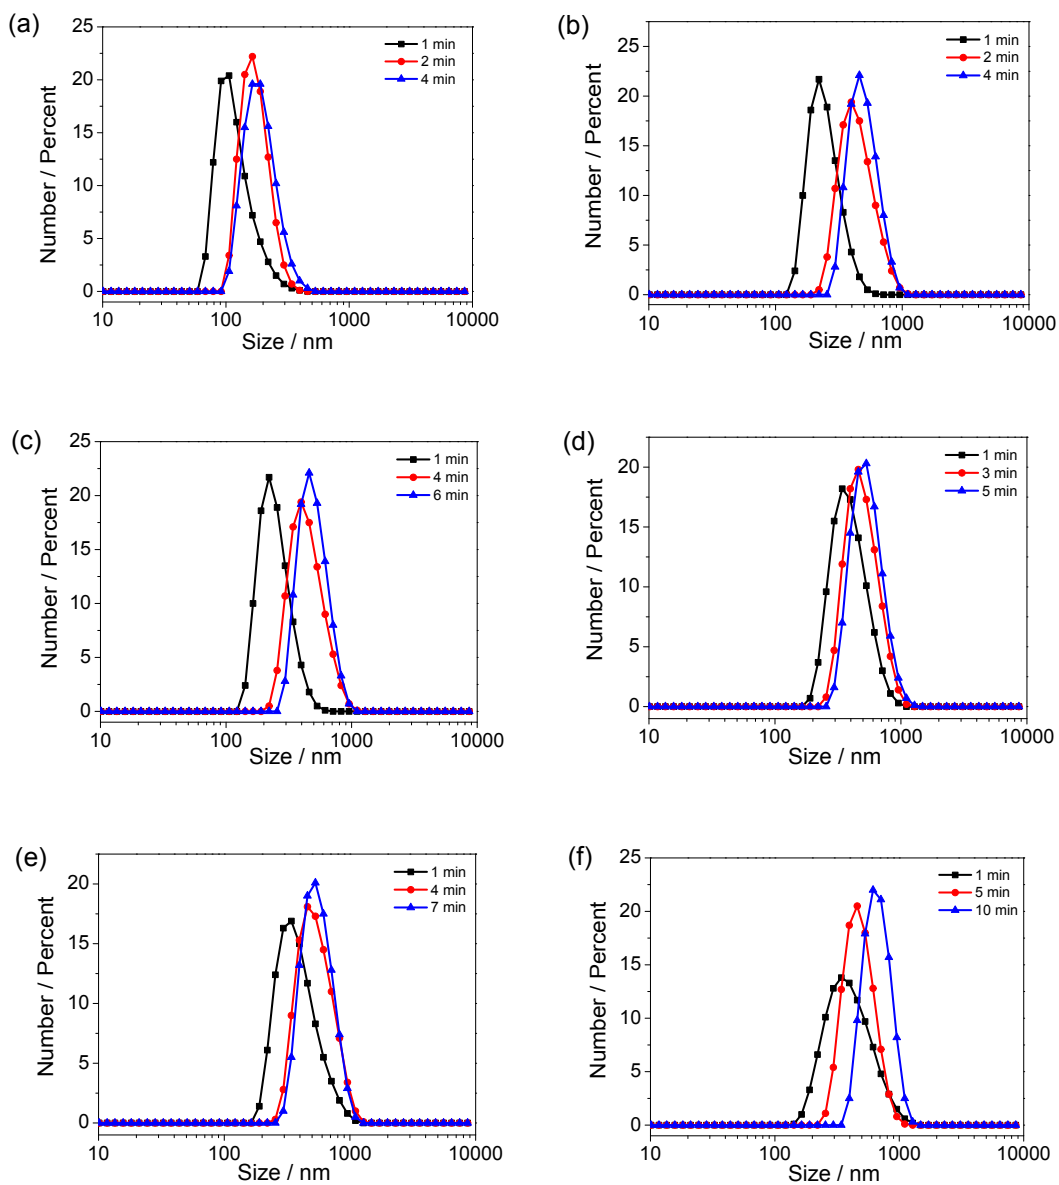

Figure S29. Time-dependent DLS experiments of compounds **1–6** (a–f) in THF–*n*-hexane (1 : 4 v/v) for compounds **1**, **2**, **4** and **5** and THF–*n*-hexane (3 : 7 v/v) for compounds **3** and **6** upon UV irradiation for various time interval (conc =  $4 \times 10^{-5}$  M).

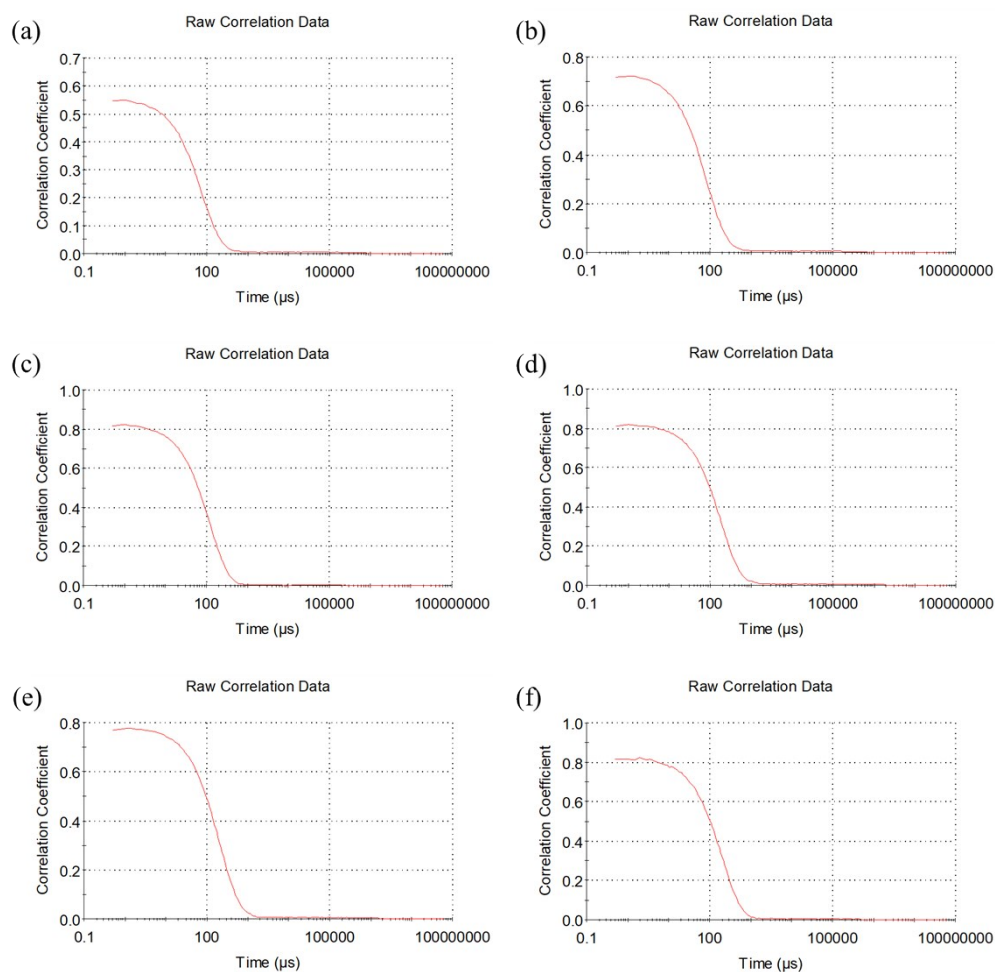

Figure S30. The autocorrelation function of the DLS results of compounds **1–6** (a–f) in THF–*n*-hexane (1 : 4 v/v) for compounds **1**, **2**, **4** and **5** and THF–*n*-hexane (3 : 7 v/v) for compounds **3** and **6** after UV irradiation at a stand time of 1 min (conc =  $4 \times 10^{-5}$  M).

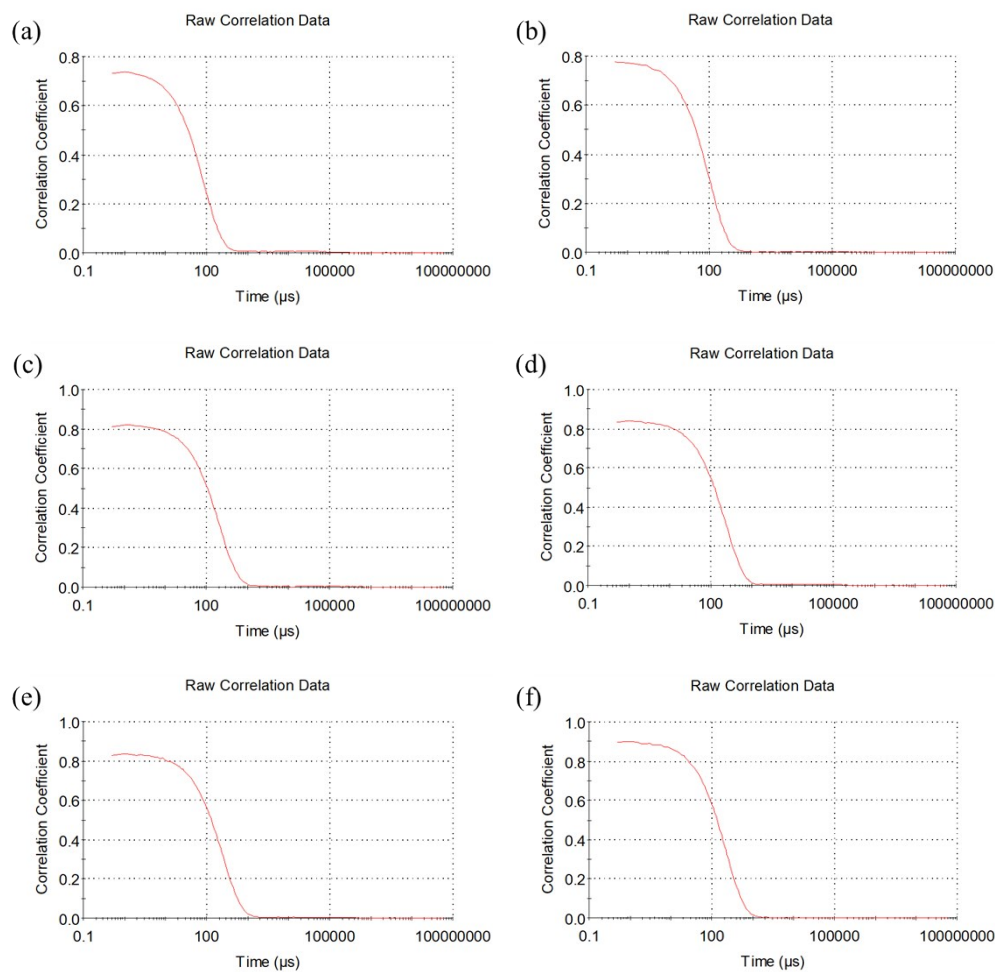

Figure S31. The autocorrelation function of the DLS results of compounds **1–6** (a–f) in THF–*n*-hexane (1 : 4 v/v) for compounds **1**, **2**, **4** and **5** and THF–*n*-hexane (3 : 7 v/v) for compounds **3** and **6** after UV irradiation at different stand time (2 min for **1**, 2 min for **2**, 4 min for **3**, 3 min for **4**, 4 min for **5** and 5 min for **6**) (conc =  $4 \times 10^{-5}$  M).

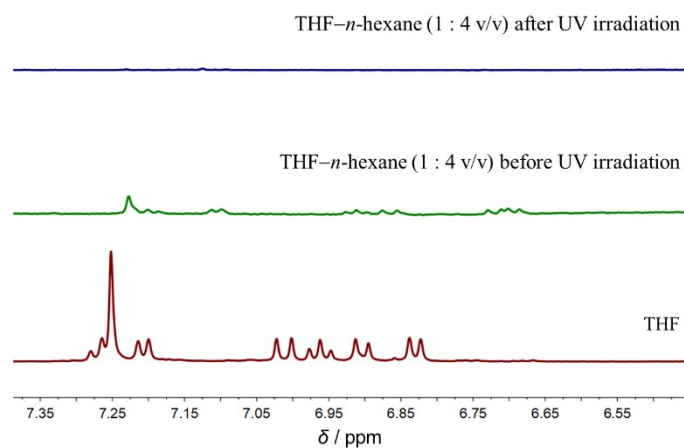

Figure S32.  $^1\text{H}$  NMR spectra of compound **5** in THF solution and THF-*n*-hexane (1 : 4 v/v) solution before and after UV light irradiation (conc =  $4 \times 10^{-5}$  M).

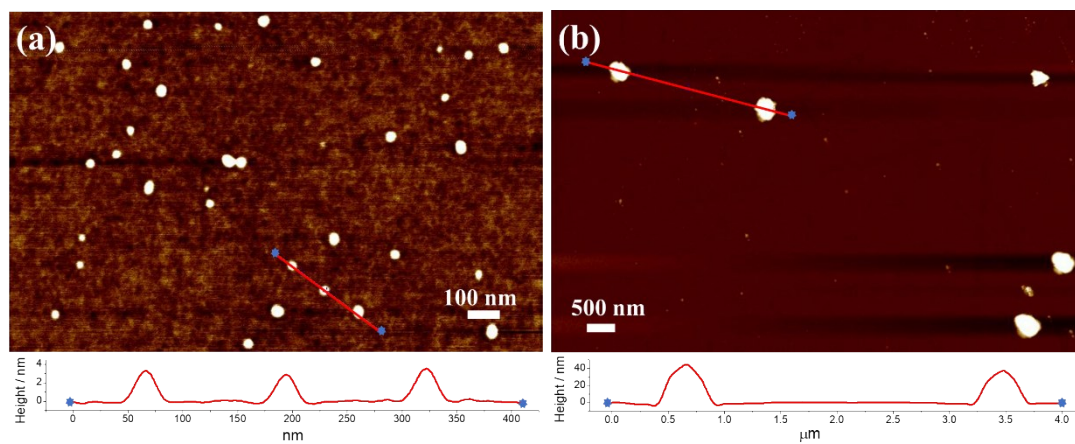

Figure S33. AFM images prepared from compound **5** in THF-*n*-hexane (1 : 4 v/v) (a) before and (b) after UV irradiation ( $[\mathbf{5}] = 4 \times 10^{-5}$  M).

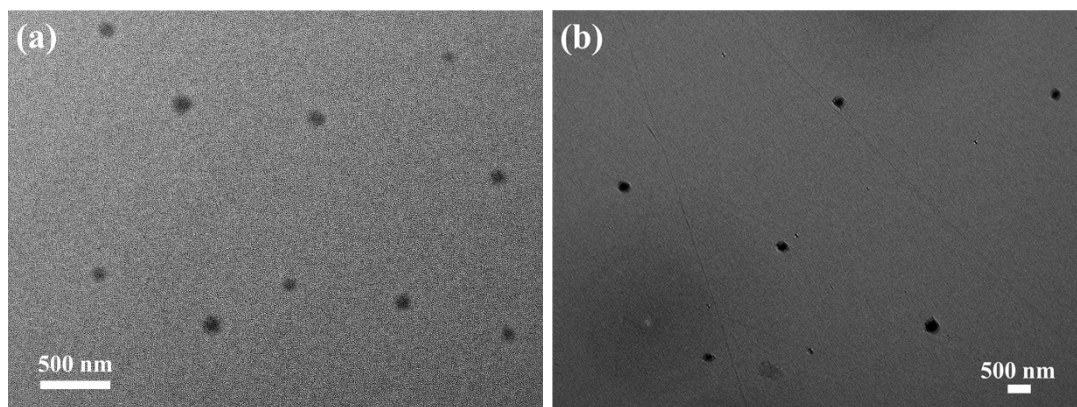

Figure S34. TEM images prepared from compound **1** in THF-*n*-hexane (1 : 4 v/v) (a) before and (b) after UV irradiation ( $[1] = 4 \times 10^{-5}$  M).

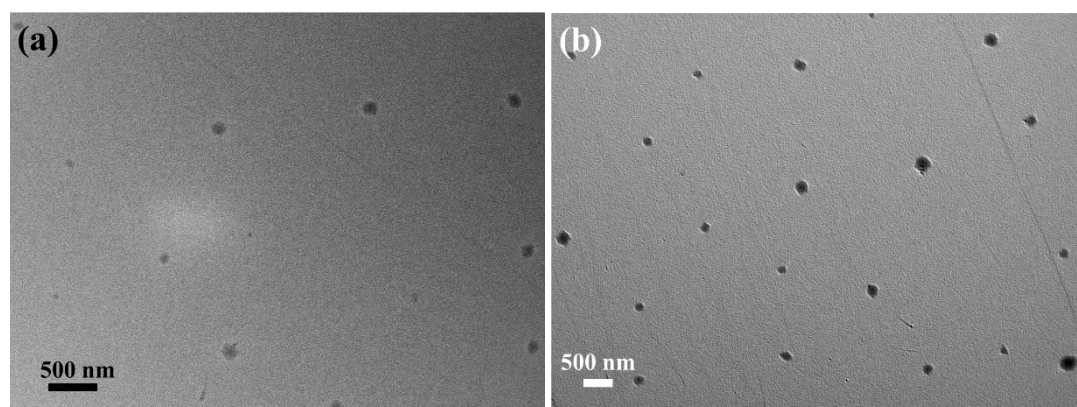

Figure S35. TEM images prepared from compound **2** in THF-*n*-hexane (1 : 4 v/v) (a) before and (b) after UV irradiation ( $[2] = 4 \times 10^{-5}$  M).

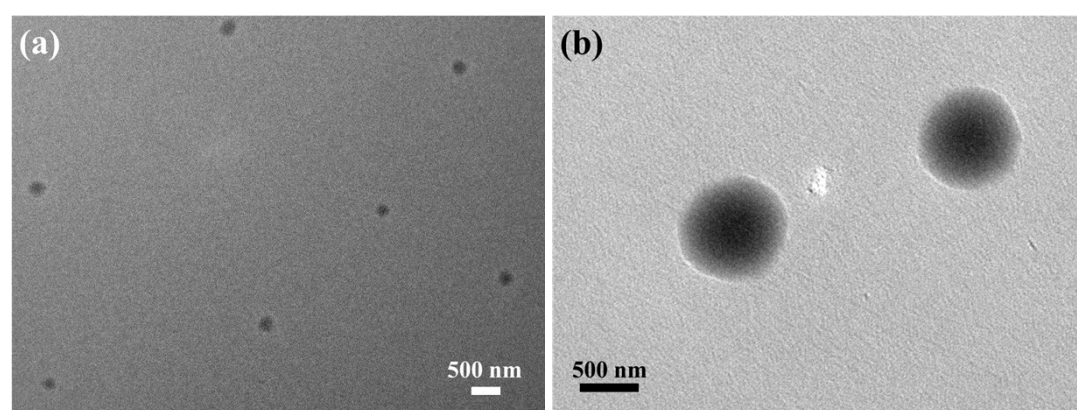

Figure S36. TEM images prepared from compound **3** in THF-*n*-hexane (3 : 7 v/v) (a) before and (b) after UV irradiation ( $[3] = 4 \times 10^{-5}$  M).

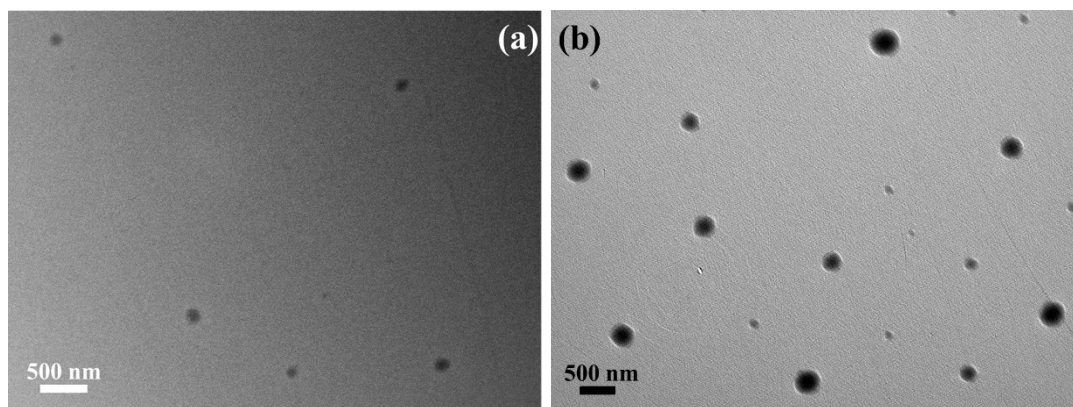

Figure S37. TEM images prepared from compound **4** in THF-*n*-hexane (1 : 4 v/v) (a) before and (b) after UV irradiation ( $[4] = 4 \times 10^{-5}$  M).

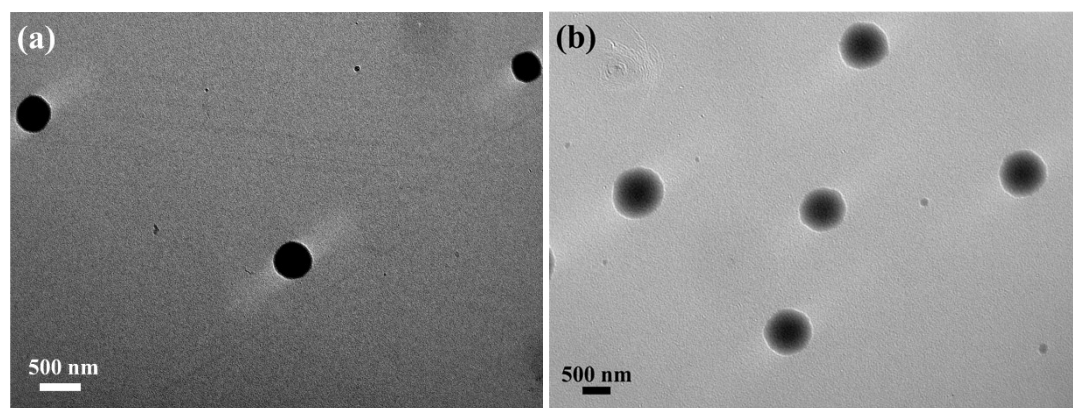

Figure S38. TEM images prepared from compound **6** in THF-*n*-hexane (3 : 7 v/v) (a) before and (b) after UV irradiation ( $[6] = 4 \times 10^{-5}$  M).



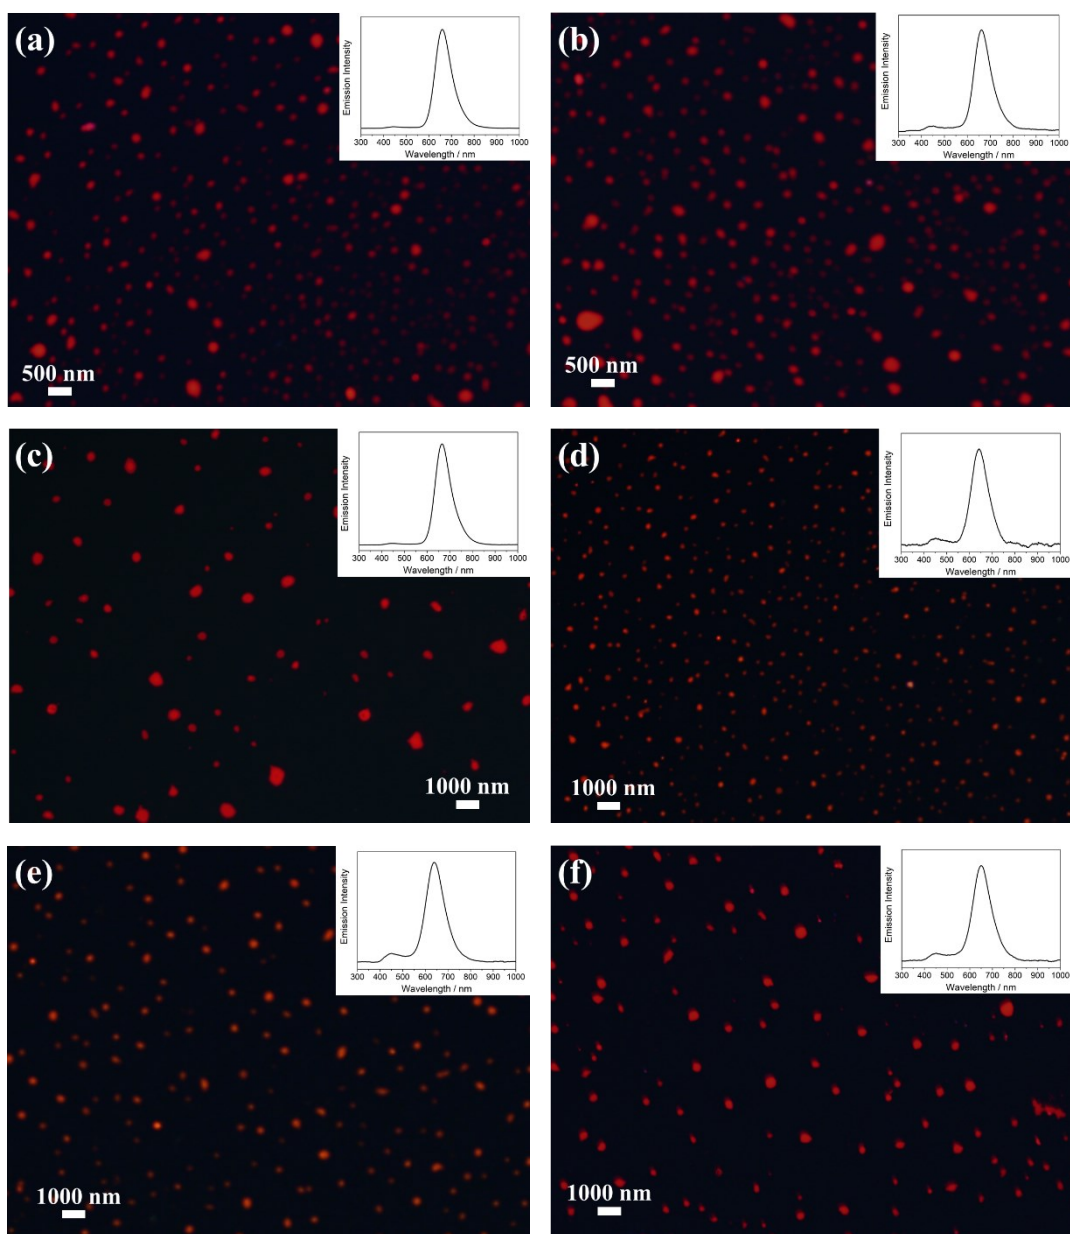

Figure S39. Fluorescence microscopy images of open forms of compounds 1–6 (a–f) in THF–*n*-hexane (1 : 4 v/v) for compounds 1, 2, 4 and 5 and THF–*n*-hexane (3 : 7 v/v) for compounds 3 and 6 at 288 K. Inset: *In situ* emission spectra (conc =  $4 \times 10^{-5}$  M).



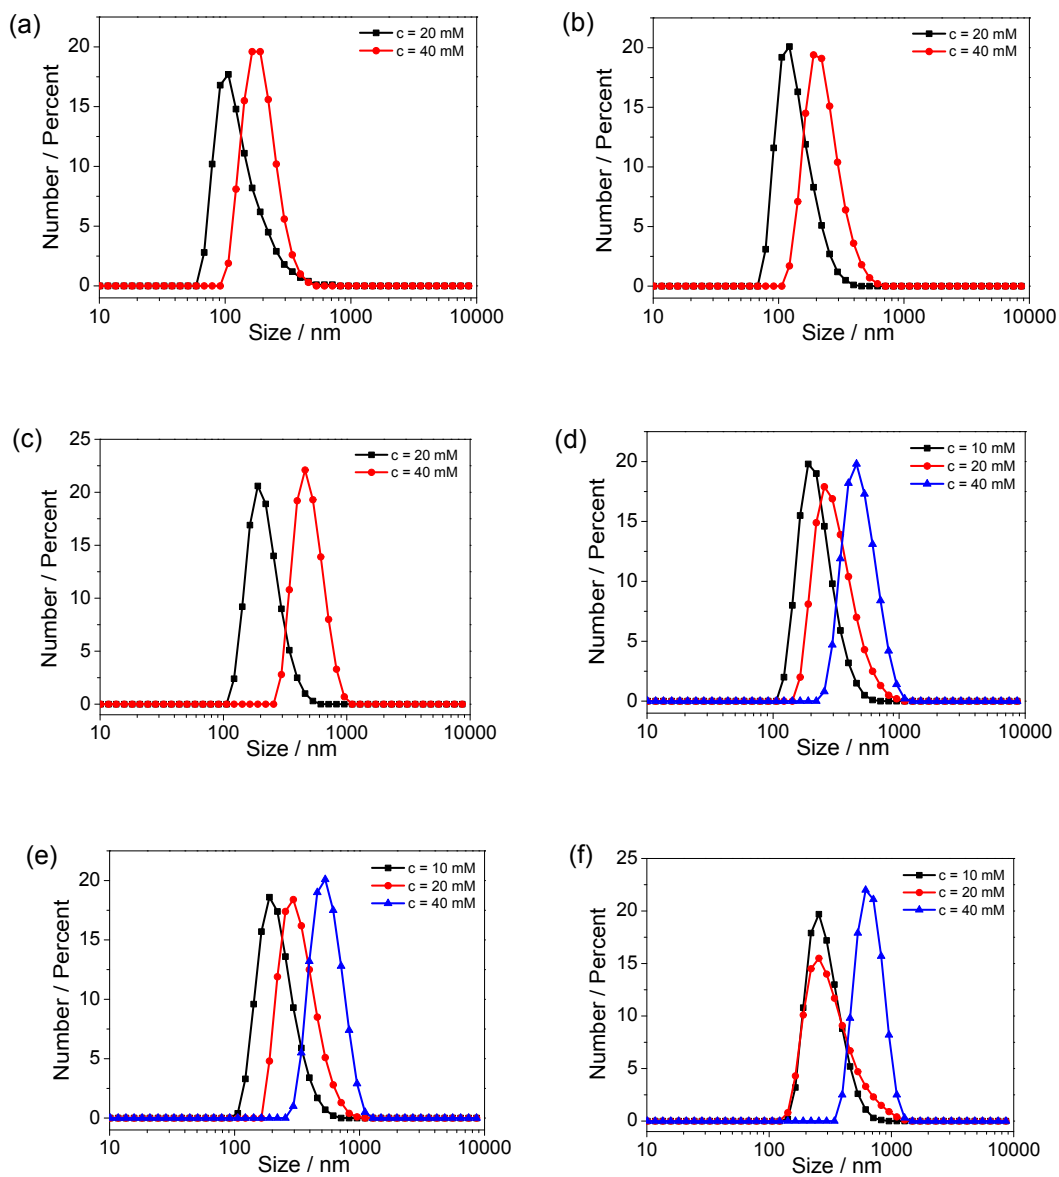

Figure S40. DLS results of compounds 1–6 (a–f) in THF-*n*-hexane (1 : 4 v/v) for compounds 1, 2, 4 and 5 and THF-*n*-hexane (3 : 7 v/v) for compounds 3 and 6 after UV irradiation at different concentrations.

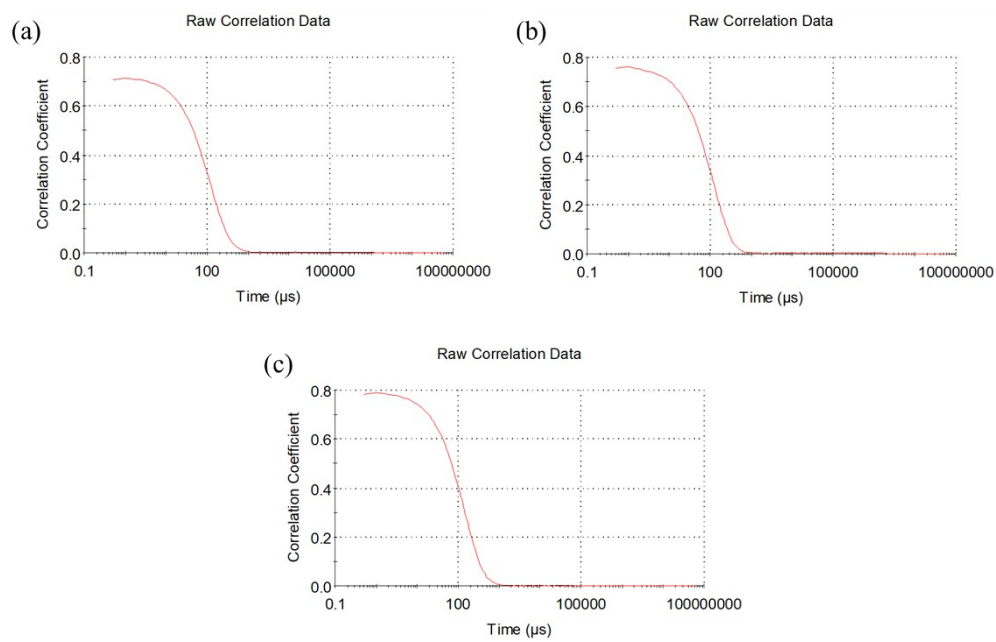

Figure S41. The autocorrelation function of the DLS results of compounds **4–6** (a–c) in THF–*n*-hexane (1 : 4 v/v) for compounds **4** and **5** and THF–*n*-hexane (3 : 7 v/v) for compounds **6** after UV irradiation (conc =  $1 \times 10^{-5}$  M).

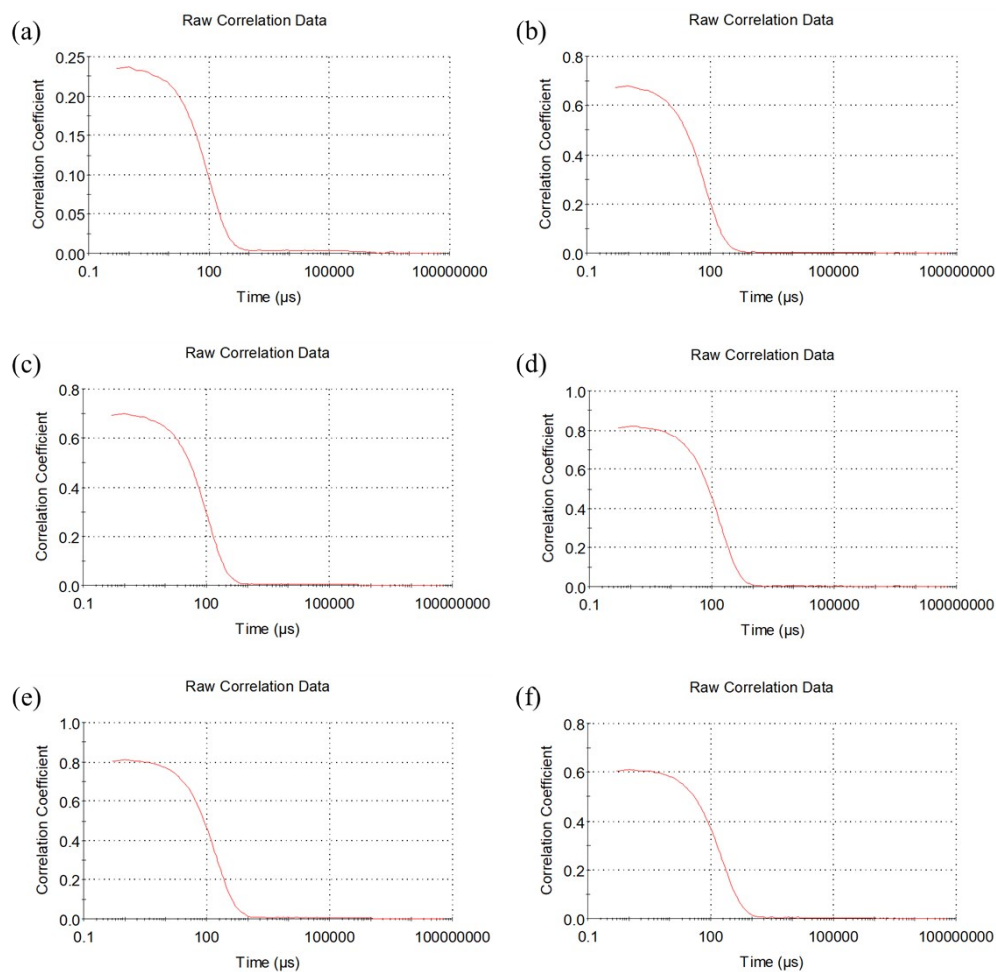

Figure S42. The autocorrelation function of the DLS results of compounds **1–6** (a–f) in THF–*n*-hexane (1 : 4 v/v) for compounds **1**, **2**, **4** and **5** and THF–*n*-hexane (3 : 7 v/v) for compounds **3** and **6** after UV irradiation (conc =  $2 \times 10^{-5}$  M).

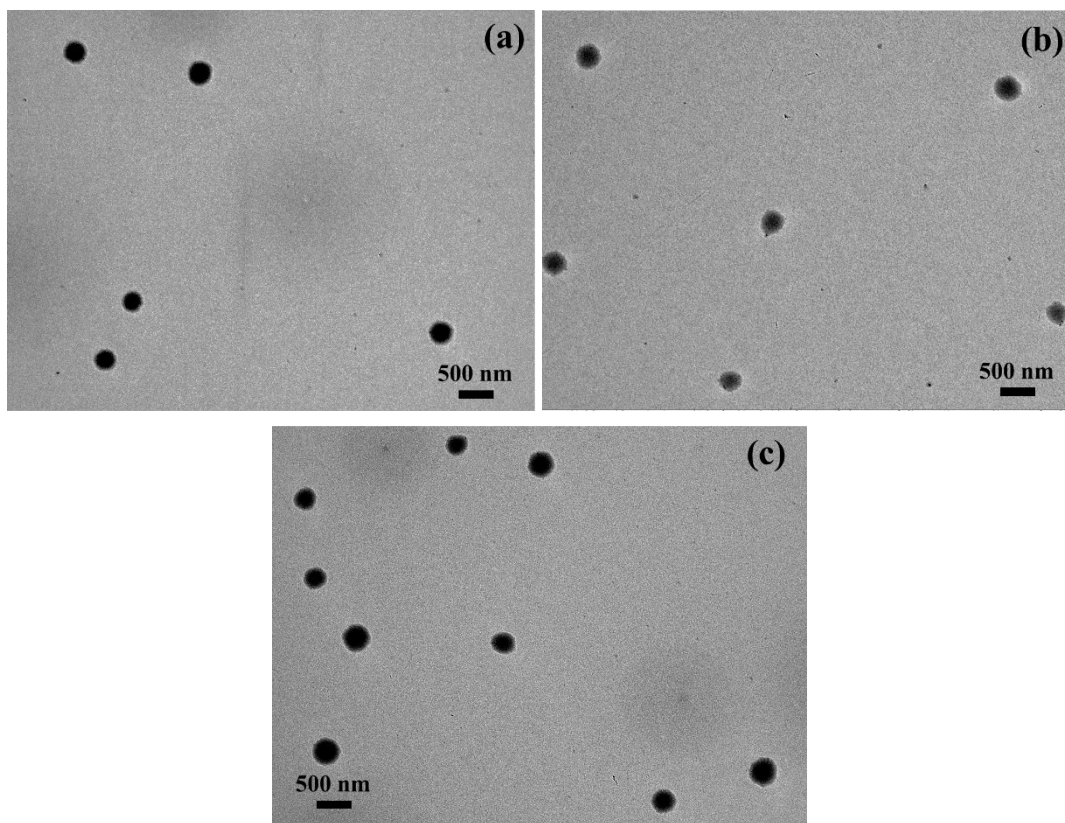

Figure S43. TEM images prepared from compounds **4–6** (a–c) in THF–*n*-hexane (1 : 4 v/v) for compounds **4** and **5** and THF–*n*-hexane (3 : 7 v/v) for compounds **6** after UV irradiation (conc =  $1 \times 10^{-5}$  M).

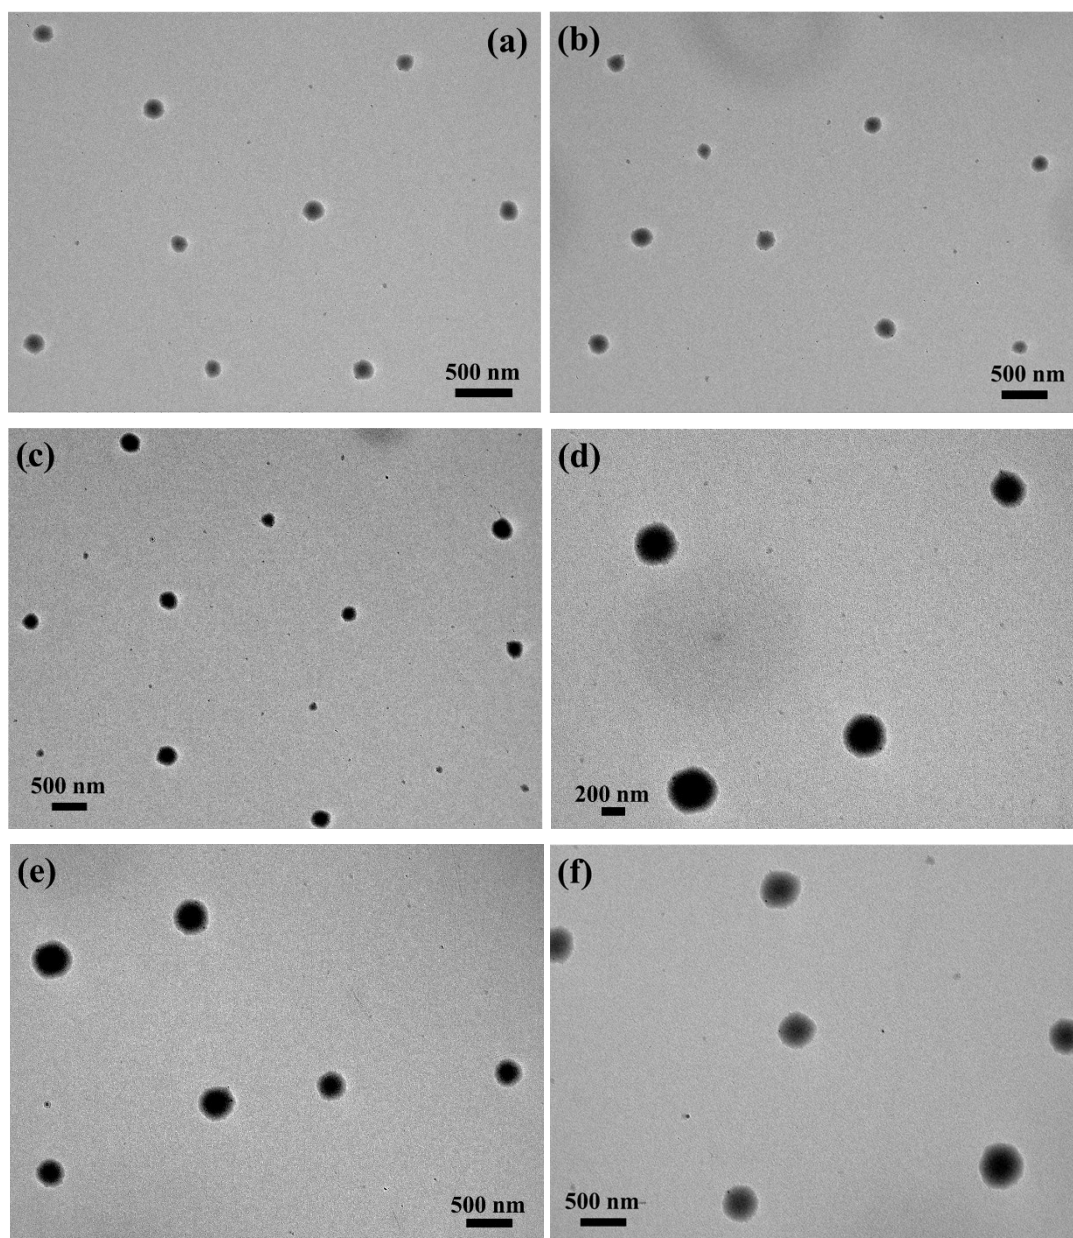

Figure S44. TEM images prepared from compounds **1–6** (a–f) in THF–*n*-hexane (1 : 4 v/v) for compounds **1**, **2**, **4** and **5** and THF–*n*-hexane (3 : 7 v/v) for compounds **3** and **6** after UV irradiation (conc =  $2 \times 10^{-5}$  M).

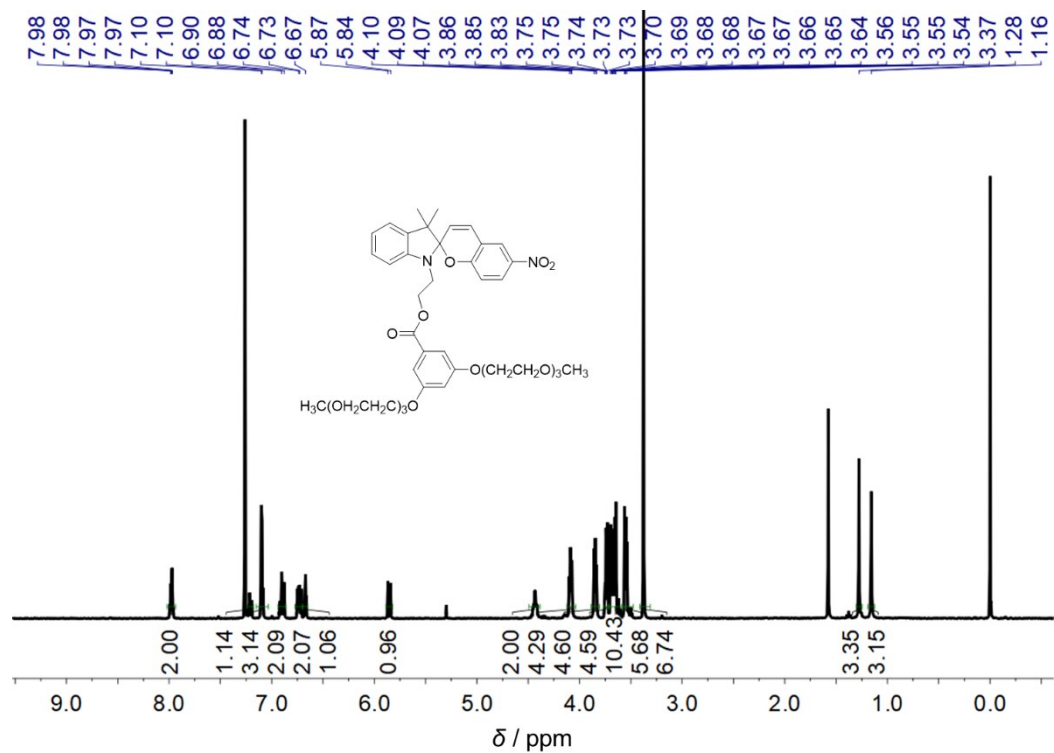

Figure S45. <sup>1</sup>H NMR spectrum of compound **1** in CDCl<sub>3</sub> at room temperature.

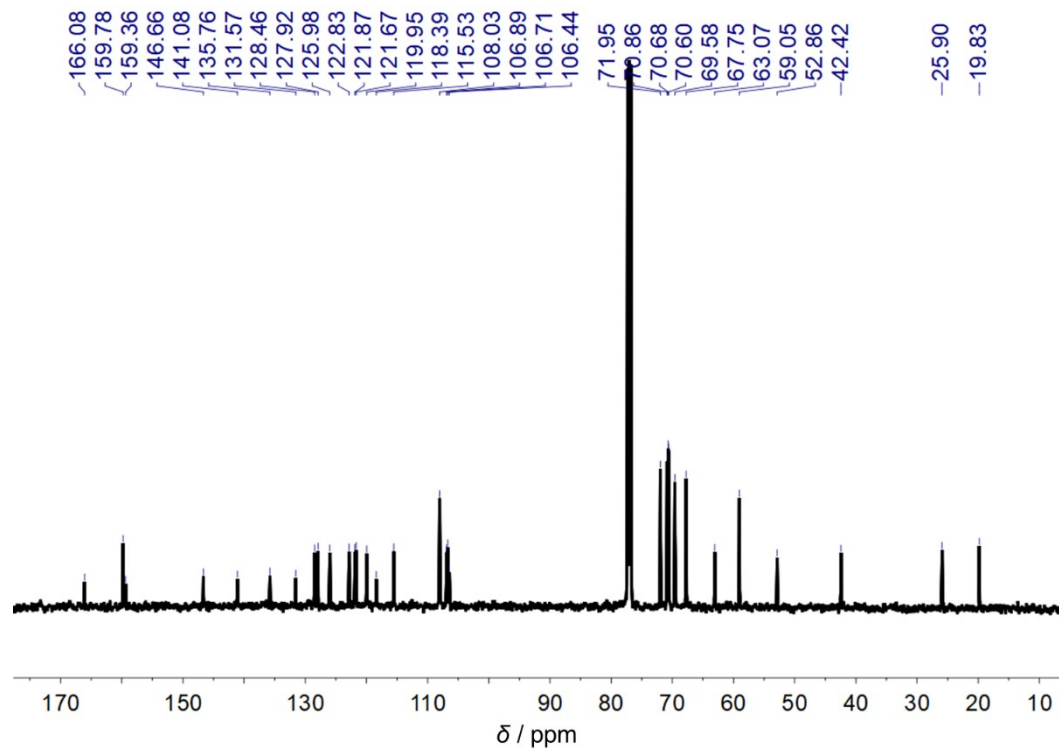

Figure S46. <sup>13</sup>C {<sup>1</sup>H} NMR spectrum of compound **1** in CDCl<sub>3</sub> at room temperature.

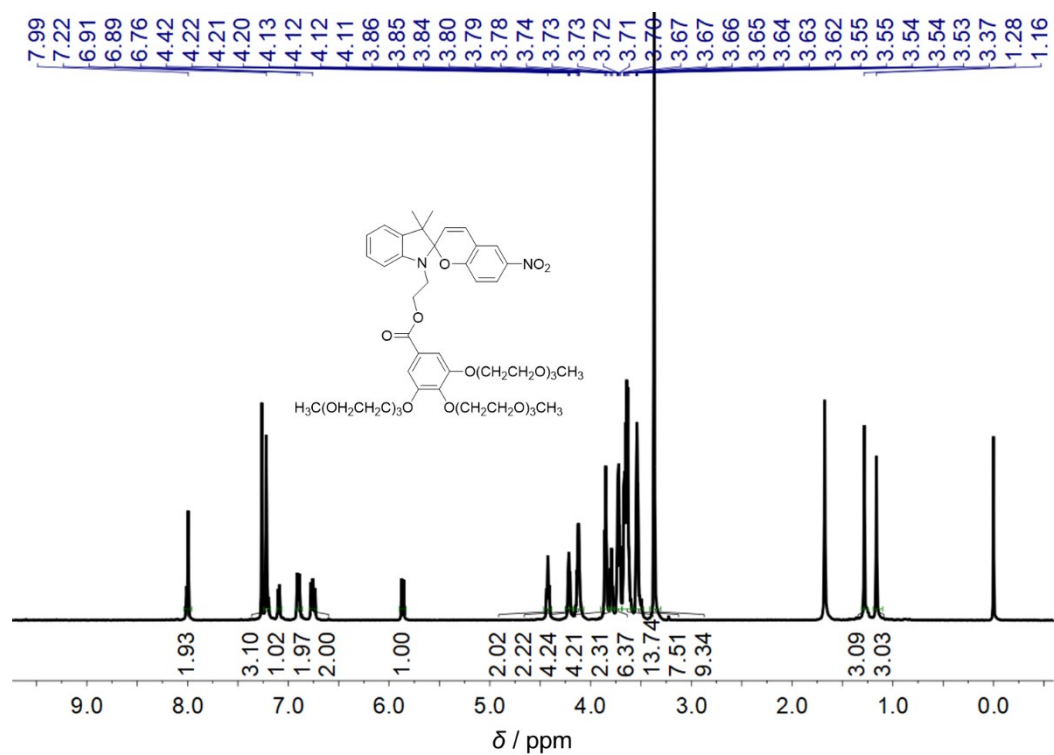

Figure S47.  $^1\text{H}$  NMR spectrum of compound **2** in  $\text{CDCl}_3$  at room temperature.

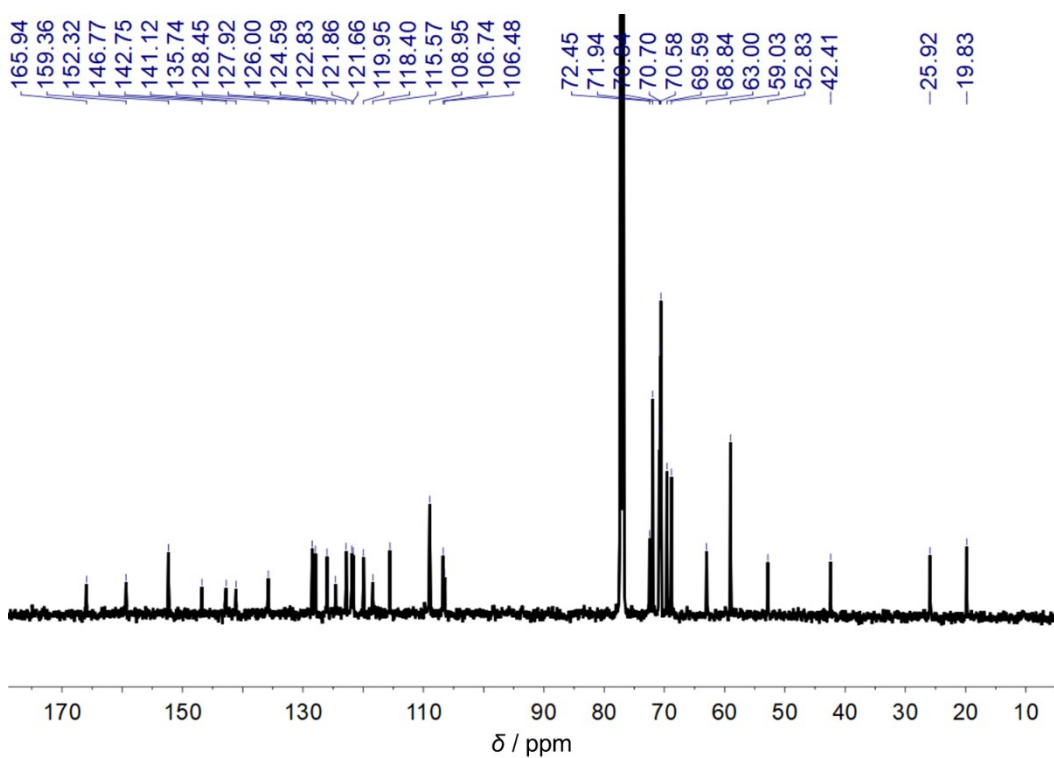

Figure S48.  $^{13}\text{C}\{^1\text{H}\}$  NMR spectrum of compound **2** in  $\text{CDCl}_3$  at room temperature.



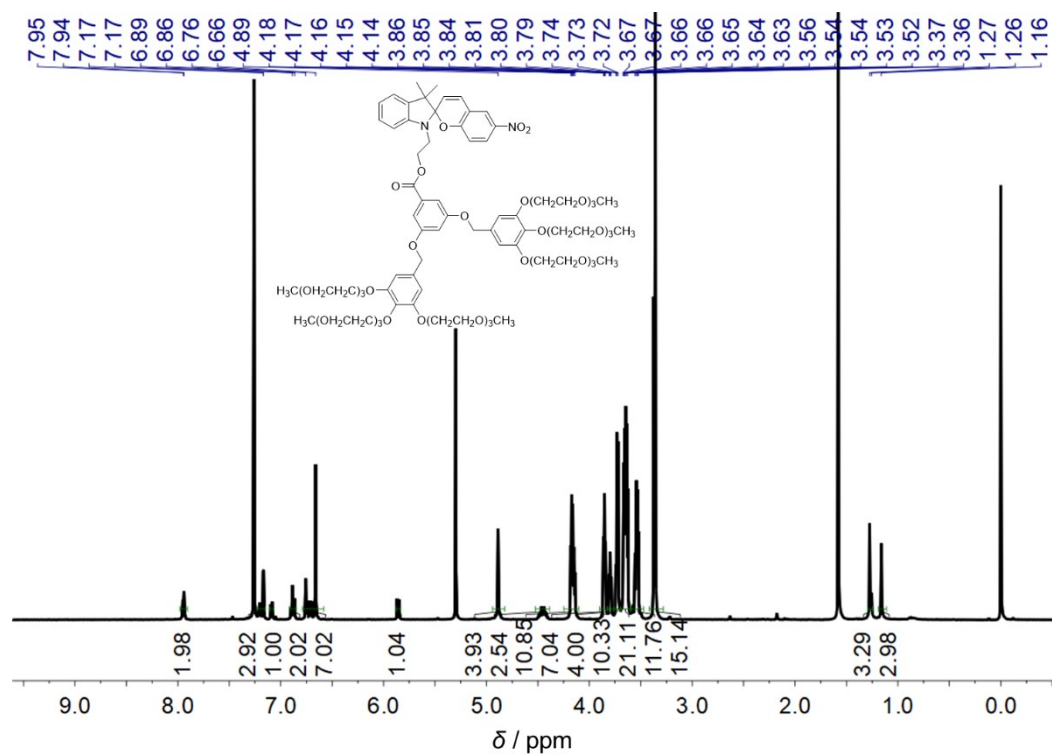

Figure S49.  $^1\text{H}$  NMR spectrum of compound **3** in  $\text{CDCl}_3$  at room temperature.

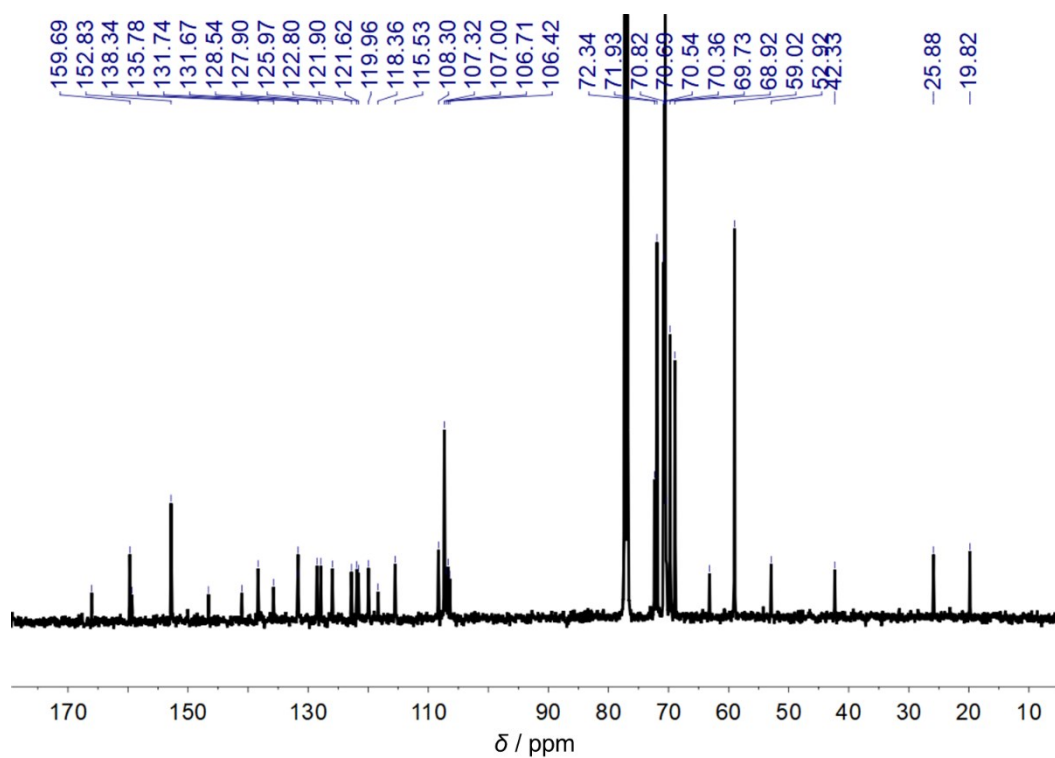

Figure S50.  $^{13}\text{C}\{^1\text{H}\}$  NMR spectrum of compound **3** in  $\text{CDCl}_3$  at room temperature.



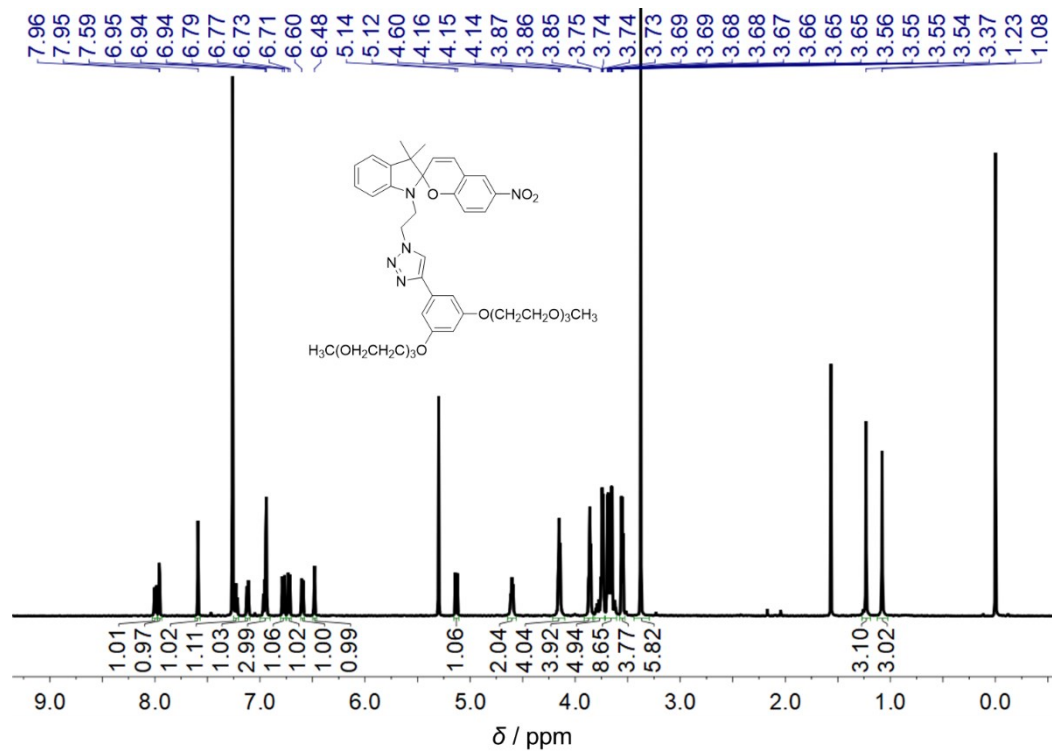

Figure S51.  $^1\text{H}$  NMR spectrum of compound **4** in  $\text{CDCl}_3$  at room temperature.

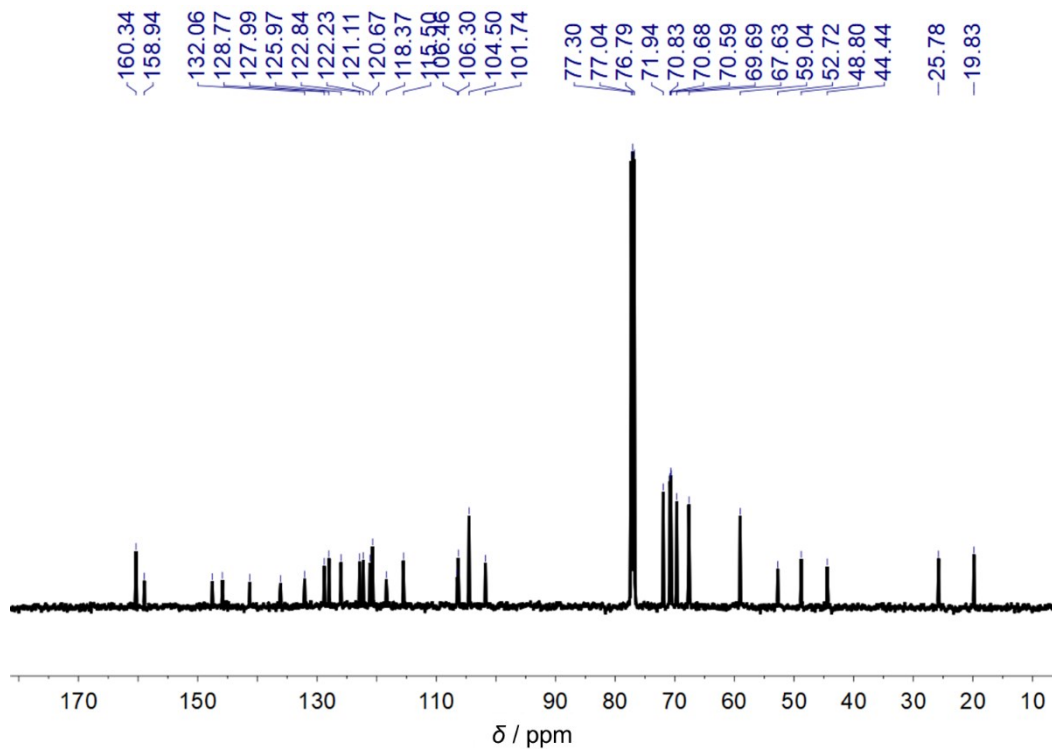

Figure S52.  $^{13}\text{C}\{^1\text{H}\}$  NMR spectrum of compound **4** in  $\text{CDCl}_3$  at room temperature.

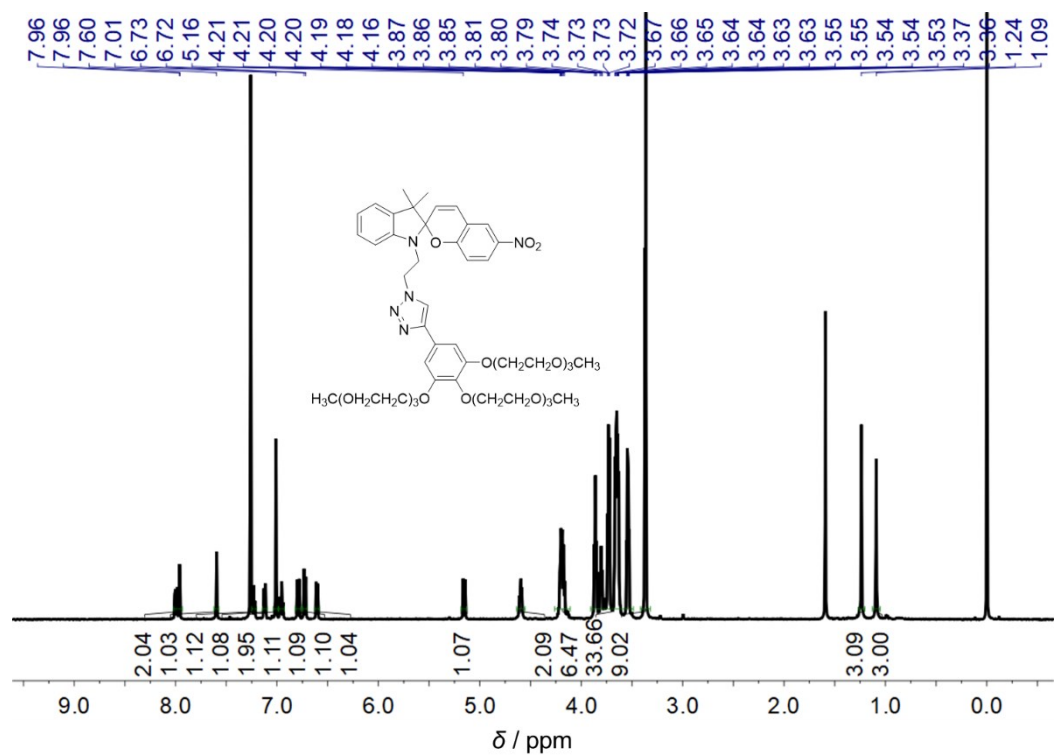

Figure S53. <sup>1</sup>H NMR spectrum of compound **5** in CDCl<sub>3</sub> at room temperature.

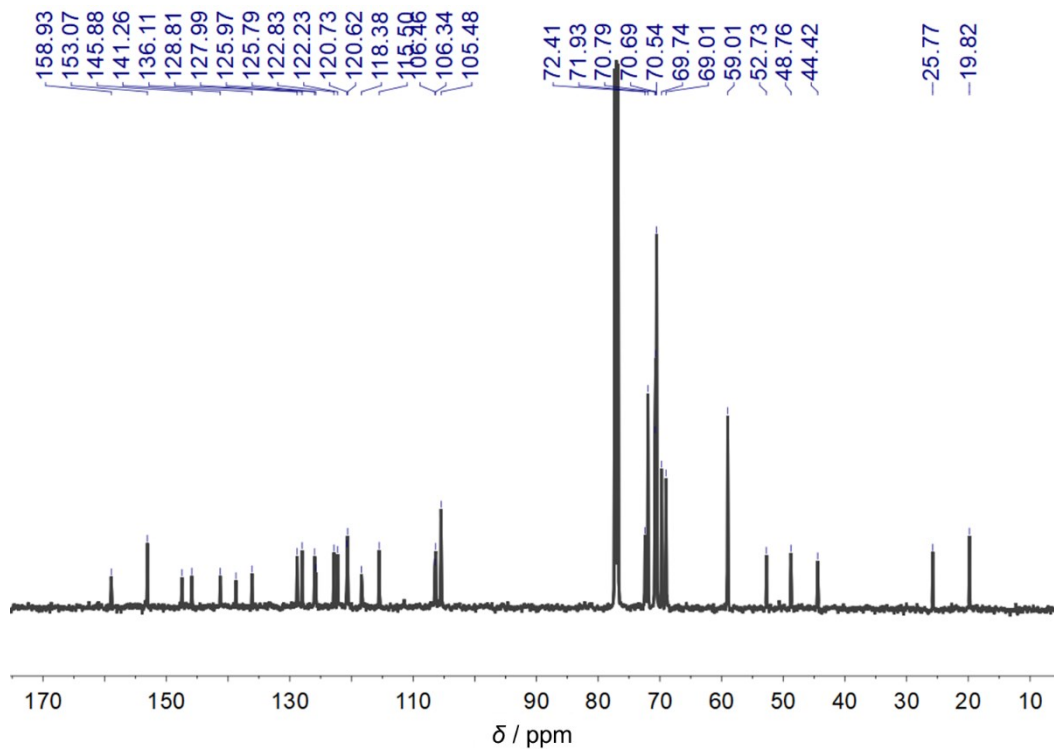

Figure S54. <sup>13</sup>C {<sup>1</sup>H} NMR spectrum of compound **5** in CDCl<sub>3</sub> at room temperature.

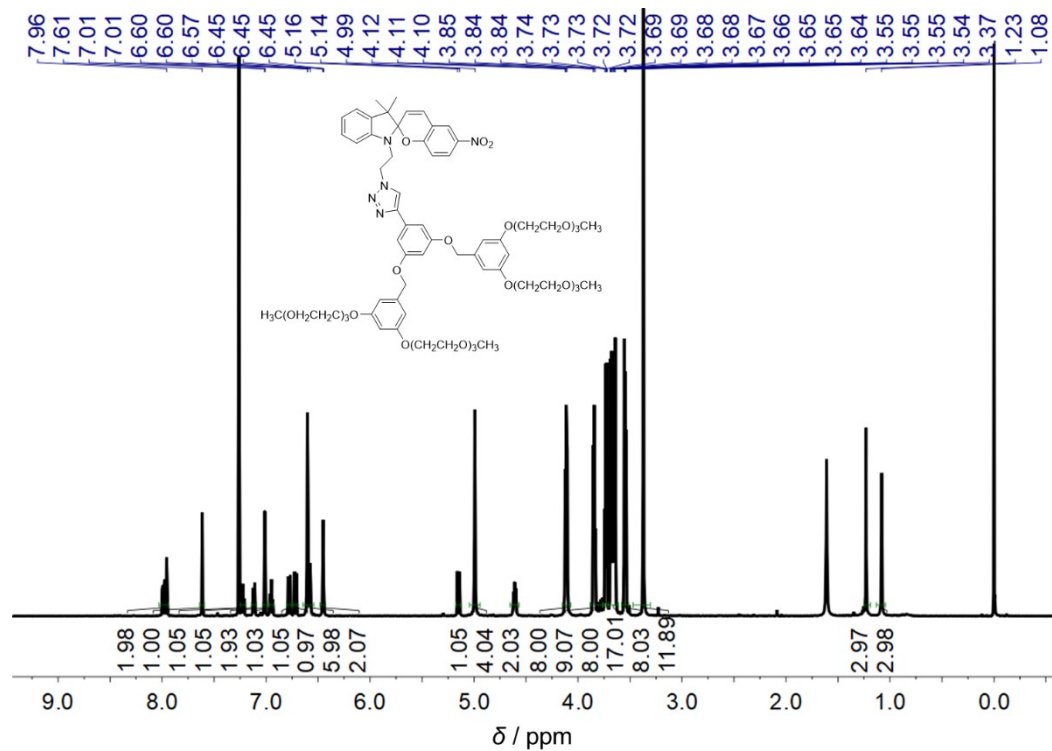

Figure S55. <sup>1</sup>H NMR spectrum of compound **6** in CDCl<sub>3</sub> at room temperature.

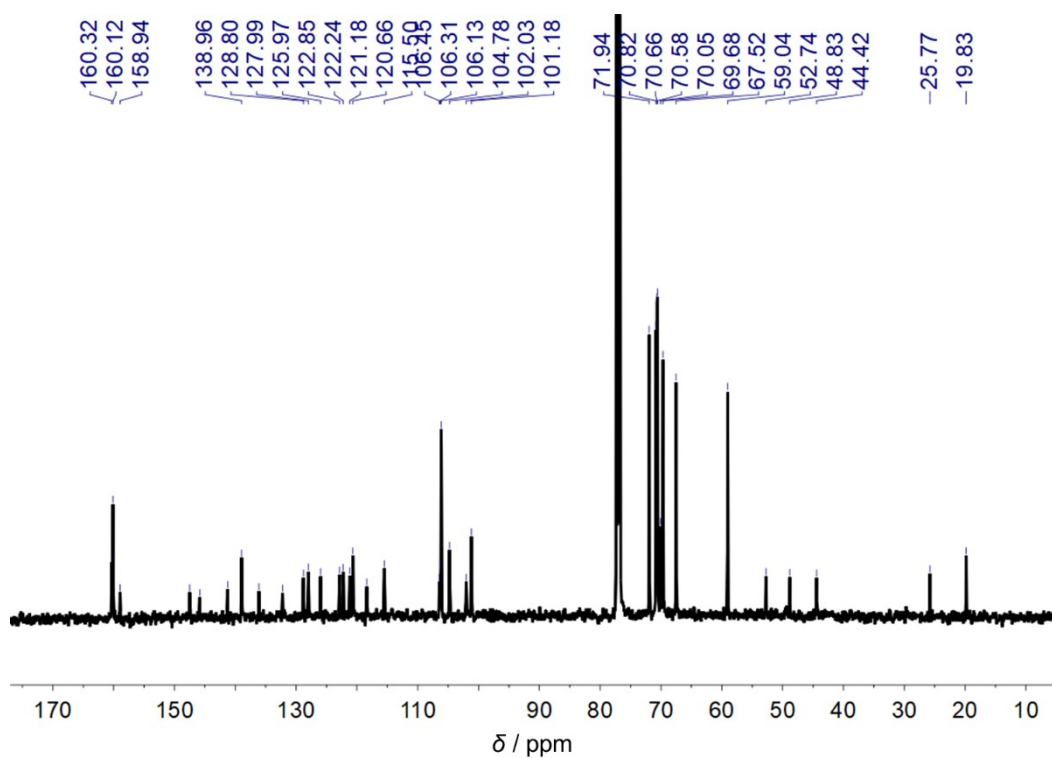

Figure S56. <sup>13</sup>C{<sup>1</sup>H} NMR spectrum of compound **6** in CDCl<sub>3</sub> at room temperature.

## Experimental section

**Materials and reagents:** 3,4,5-Trimethoxybenzoic acid, 1-bromo-3,4,5-trimethoxybenzene, 4-dimethylaminopyridine (DMAP), *N,N*-dicyclohexylcarbodiimide (DCC), trimethylsilylacetylene (TMSA), copper(I) iodide (CuI), and potassium tetrachloroplatinate(II) ( $K_2[PtCl_4]$ ) were purchased from Energy Chemical Co, Ltd. Sodium azide ( $NaN_3$ ), copper(II) sulfate pentahydrate ( $CuSO_4 \cdot 5H_2O$ ), *N,N*-dimethylformamide (DMF), dichloromethane (DCM), diisopropanolamine (DIPA), tetrahydrofuran (THF), potassium carbonate ( $K_2CO_3$ ) and sodium sulphate ( $Na_2SO_4$ ) were products of Beijing Chemical Reagent Company. All commercially available reagents were of analytical grade and were used as received. All solvents were purified and distilled using standard procedures before use. Tetrakis(triphenylphosphine)palladium(0)<sup>1</sup> as catalysts for Sonogashira coupling reactions, 2-(3',3'-dimethyl-6-nitrospiro[chromene-2,2'-indolin]-1'-yl)ethan-1-ol (SP-OH),<sup>2</sup> 2-(3',3'-dimethyl-6-nitrospiro[chromene-2,2'-indolin]-1'-yl)ethyl 4-methylbenzenesulfonate (SP-OTs),<sup>3</sup> 1'-(2-azidoethyl)-3',3'-dimethyl-6-nitrospiro[chromene-2,2'-indoline] (SP-N<sub>3</sub>),<sup>4</sup> 3,5-bis(triethyleneglycol methyl ether)benzoic acid (2TEG-Ph-COOH),<sup>5</sup> 3,4,5-tris(triethyleneglycol methyl ether)benzoic acid (3TEG-Ph-COOH),<sup>5</sup> 1-ethynyl-3,5-bis(triethyleneglycol methyl ether)benzene (2TEG-Ph-alkyne),<sup>6</sup> 5-ethynyl-1,2,3-tris(triethyleneglycol methyl ether)benzene (3TEG-Ph-alkyne),<sup>7</sup> 3,5-bis((3,4,5-tris(triethyleneglycol methyl ether)benzyl)oxy)benzoic acid (G2-3TEG-Ph-COOH),<sup>8</sup> and 5,5'-(((5-bromo-1,3-phenylene)bis(oxy))bis(methylene))bis(1,3-bis(triethyleneglycol methyl ether)benzene) (G2-2TEG-Ph-Br)<sup>9</sup> were synthesized according to the literature with slight modifications.

## Synthesis and characterization

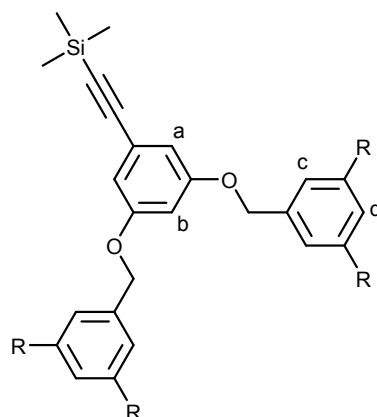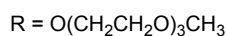

**L1 (G2-2TEG-Ph-TMSA).** This was prepared through a Sonogashira coupling which has been described in the literature with slight modifications.<sup>10</sup> To a degassed diisopropanolamine solution (120 mL) of G2-2TEG-Ph-Br (4.00 g, 3.93 mmol) and trimethylsilylacetylene (TMSA) (1.50 g, 15.72 mmol) were added a catalytic amount of tetrakis(triphenylphosphine)palladium(0) (227.15 mg, 0.20 mmol) and CuI (37.50 mg, 0.20 mmol). The reaction mixture was heated to reflux overnight under nitrogen. The resulting mixture was filtered and evaporated to dryness under reduced pressure. The crude product was purified by column chromatography on silica gel (100–200 mesh) using ethyl acetate-methanol (10:1 v/v) as the eluent to afford the product as a colorless oil. Yield: 2.35 g, 2.27 mmol (58 %). <sup>1</sup>H NMR (500 MHz, CDCl<sub>3</sub>, 298 K, relative to Me<sub>4</sub>Si):  $\delta$ /ppm = 6.69 (d,  $J = 2.3$  Hz, 2H; H<sub>a</sub>), 6.59–6.54 (m, 5H; H<sub>b</sub>, H<sub>c</sub>), 6.44 (s, 2H; H<sub>d</sub>), 4.93 (s, 4H; –OCH<sub>2</sub>–), 4.14–4.06 (m, 8H; –OCH<sub>2</sub>–), 3.87–3.81 (m, 8H; –CH<sub>2</sub>O–), 3.76–3.71 (m, 8H; –OCH<sub>2</sub>–), 3.70–3.63 (m, 16H; –CH<sub>2</sub>–), 3.57–3.52 (m, 8H; –CH<sub>2</sub>O–), 3.37 (s, 12H; –OCH<sub>3</sub>), 0.25 (s, 9H; –Si(CH<sub>3</sub>)<sub>3</sub>).

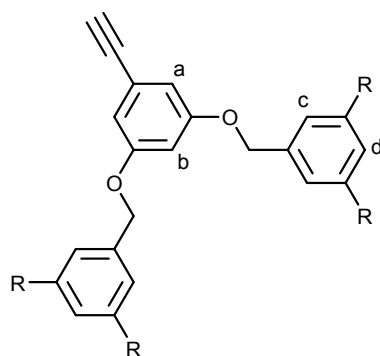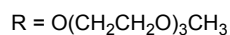

**L2 (G2-2TEG-Ph-alkyne).** To a tetrahydrofuran solution (50 mL) of G2-2TEG-Ph-TMSA (2.35 g, 2.27 mmol) was added  $\text{K}_2\text{CO}_3$  (1.16 g 9.08 mmol). The mixture was stirred overnight at room temperature, then deionized water was added. The organic part was extracted with chloroform, dried over anhydrous  $\text{Na}_2\text{SO}_4$  and evaporated to dryness under reduced pressure. The crude product was purified by column chromatography on silica gel (100–200 mesh) using ethyl acetate-methanol (10:1 v/v) as the eluent to afford the product as a colorless oil. Yield: 2.05 g, 2.13 mmol (94 %).  $^1\text{H}$  NMR (500 MHz,  $\text{CDCl}_3$ , 298 K, relative to  $\text{Me}_4\text{Si}$ ):  $\delta/\text{ppm} = 6.70$  (d,  $J = 2.1$  Hz, 2H;  $\text{H}_a$ ), 6.60–6.58 (m, 1H;  $\text{H}_b$ ), 6.57 (d,  $J = 1.8$  Hz, 4H;  $\text{H}_c$ ), 6.44 (s, 2H;  $\text{H}_d$ ), 4.93 (s, 4H;  $-\text{OCH}_2-$ ), 4.13–4.08 (m, 8H;  $-\text{OCH}_2-$ ), 3.87–3.82 (m, 8H;  $-\text{CH}_2\text{O}-$ ), 3.76–3.70 (m, 8H;  $-\text{OCH}_2-$ ), 3.69–3.62 (m, 16H;  $-\text{CH}_2-$ ), 3.57–3.52 (m, 8H;  $-\text{CH}_2\text{O}-$ ), 3.37 (s, 12H;  $-\text{OCH}_3$ ), 3.03 (s, 1H;  $-\text{C}\equiv\text{CH}$ ).

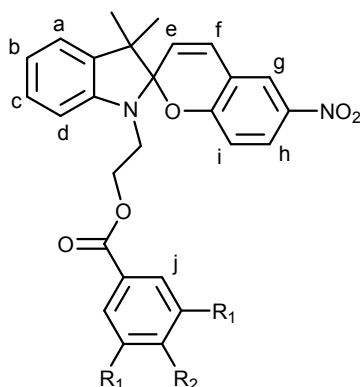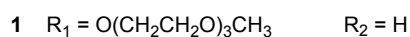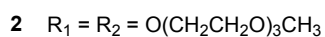

**Compound 1.** To a degassed solution of SP-OH (960 mg, 2.75 mmol), 2TEG-Ph-COOH (1.47 g, 3.30 mmol) and catalytic amount of 4-dimethylaminopyridine (DMAP) (37.5 mg, 0.31 mmol) in dry dichloromethane (60 mL) was added *N,N'*-dicyclohexylcarbodiimide (DCC) (684 mg, 3.32 mmol). The resulting solution was allowed to stir at room temperature for 36 h under nitrogen atmosphere. After filtering off the resulting *N,N'*-dicyclohexylurea (DCU), the solvent was removed under reduced pressure to obtain the residue, which was purified by column chromatography on silica gel (100–200 mesh) in the dark using ethyl acetate as the eluent to afford the product as an oil with a pale blue tint. Yield: 1.21 g, 1.55 mmol (56 %). <sup>1</sup>H NMR (500 MHz, CDCl<sub>3</sub>, 298 K, relative to Me<sub>4</sub>Si): δ/ppm = 8.00–7.95 (m, 2H; H<sub>b</sub>, H<sub>g</sub>), 7.24–7.18 (m, 1H; H<sub>c</sub>), 7.12–7.06 (m, 3H; H<sub>j</sub>, H<sub>a</sub>), 6.93–6.86 (m, 2H; H<sub>b</sub>, R<sub>2</sub>), 6.77–6.70 (m, 2H; H<sub>f</sub>, H<sub>i</sub>), 6.69–6.64 (m, 1H; H<sub>d</sub>), 5.86 (d, *J* = 10.3 Hz, 1H; H<sub>e</sub>), 4.48–4.39 (m, 2H; –CH<sub>2</sub>O–), 4.12–4.05 (m, 4H; –OCH<sub>2</sub>–), 3.89–3.81 (m, 4H; –CH<sub>2</sub>O–), 3.77–3.71 (m, 4H; –OCH<sub>2</sub>–), 3.71–3.63 (m, 10H; –CH<sub>2</sub>OCH<sub>2</sub>–, –NCH<sub>2</sub>–), 3.58–3.52 (m, 4H; –CH<sub>2</sub>O–), 3.37 (s, 6H; –OCH<sub>3</sub>), 1.28 (s, 3H; –CH<sub>3</sub>), 1.16 (s, 3H; –CH<sub>3</sub>). <sup>13</sup>C{<sup>1</sup>H} NMR (125 MHz, CDCl<sub>3</sub>, 298 K): δ/ppm = 166.08, 159.78, 159.36, 146.66, 141.08, 135.76, 131.57, 128.46, 127.92, 125.98, 122.83, 121.87, 121.67, 119.95, 118.39, 115.53, 108.03, 106.89, 106.71, 106.44, 71.95, 70.86, 70.68, 70.60, 69.58, 67.75, 63.07, 59.05, 52.86, 42.42, 25.90, 19.83. Positive HR-ESI MS: calcd for [C<sub>41</sub>H<sub>53</sub>N<sub>2</sub>O<sub>13</sub>]<sup>+</sup> *m/z* 781.3548; found 781.3542 [M+H]<sup>+</sup>. Elemental analysis calcd (%) for C<sub>41</sub>H<sub>52</sub>N<sub>2</sub>O<sub>13</sub>: C 63.06, H 6.71, N 3.59; found: C 63.04, H 6.76, N 3.42.

**Compound 2.** This was prepared from a similar procedure as that of compound **1**, except 3TEG-Ph-COOH (1.13 g, 1.86 mmol) was used instead of 2TEG-Ph-COOH. Yield: 724.32 mg, 0.9 mmol (58 %). <sup>1</sup>H NMR (500 MHz, CDCl<sub>3</sub>, 298 K, relative to Me<sub>4</sub>Si): δ/ppm = 8.04–7.96 (m, 2H; H<sub>b</sub>, H<sub>g</sub>), 7.25–7.17 (m, 3H; H<sub>j</sub>, H<sub>c</sub>), 7.09 (d, *J* = 6.8 Hz, 1H; H<sub>a</sub>), 6.93–6.86 (m, 2H; H<sub>b</sub>, H<sub>f</sub>), 6.80–6.71 (m, 2H; H<sub>i</sub>, H<sub>d</sub>), 5.87 (d, *J* = 10.3 Hz, 1H; H<sub>e</sub>), 4.42 (t, *J* = 6.3 Hz, 2H; –CH<sub>2</sub>O–), 4.25–4.18 (m, 2H; –OCH<sub>2</sub>–), 4.17–4.07 (m, 4H; –OCH<sub>2</sub>–), 3.90–3.47 (m, 32H; –CH<sub>2</sub>–, –NCH<sub>2</sub>–), 3.37 (s, 9H; –OCH<sub>3</sub>), 1.28 (s, 3H; –CH<sub>3</sub>), 1.16 (s, 3H; –CH<sub>3</sub>). <sup>13</sup>C{<sup>1</sup>H} NMR (125 MHz, CDCl<sub>3</sub>, 298 K): δ/ppm = 165.94, 159.36, 152.32, 146.77, 142.75, 141.12, 135.74, 128.45, 127.92, 126.00, 124.59, 122.83, 121.86, 121.66, 119.95, 118.40, 115.57, 108.95, 106.74,

106.48, 72.45, 71.94, 70.84, 70.70, 70.58, 69.59, 68.84, 63.00, 59.03, 52.83, 42.41, 25.92, 19.83. Positive HR-ESI MS: calcd for  $[C_{48}H_{67}N_2O_{17}]^+$   $m/z$  943.4440; found 943.4434  $[M+H]^+$ . Elemental analysis calcd (%) for  $C_{48}H_{66}N_2O_{17}$ : C 61.13, H 7.05, N 2.97; found: C 61.14, H 7.08, N 2.85.

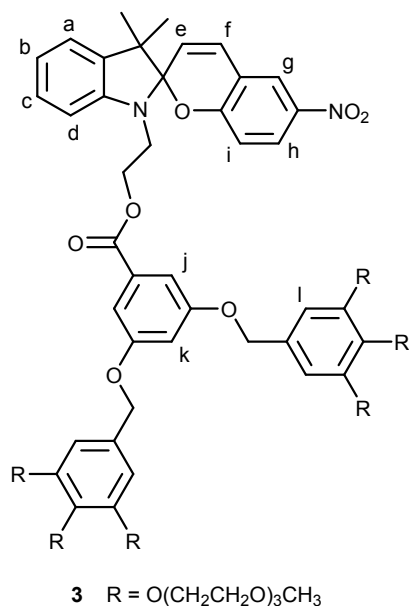

**Compound 3.** This was prepared from a similar procedure as that of compound **1**, except G2-3TEG-Ph-COOH (727 mg, 0.56 mmol) was used instead of 2TEG-Ph-COOH. Yield: 427 mg, 0.26 mmol (56 %). <sup>1</sup>H NMR (500 MHz, CDCl<sub>3</sub>, 298 K, relative to Me<sub>4</sub>Si):  $\delta$ /ppm = 7.97–7.91 (m, 2H; H<sub>b</sub>, H<sub>g</sub>), 7.23–7.14 (m, 3H; H<sub>c</sub>, H<sub>j</sub>), 7.09 (d,  $J$  = 7.3 Hz, 1H; H<sub>a</sub>), 6.92–6.85 (m, 2H; H<sub>b</sub>, H<sub>f</sub>), 6.79–6.60 (m, 7H; H<sub>k</sub>, H<sub>i</sub>, H<sub>d</sub>, H<sub>l</sub>), 5.86 (d,  $J$  = 10.4 Hz, 1H; H<sub>e</sub>), 4.89 (s, 4H; –OCH<sub>2</sub>–), 4.52–4.39 (m, 2H; –CH<sub>2</sub>O–), 4.25–4.10 (m, 12H; –OCH<sub>2</sub>–), 3.90–3.47 (m, 62H; CH<sub>2</sub>, –NCH<sub>2</sub>–), 3.41–3.29 (m, 18H; –OCH<sub>3</sub>), 1.26 (s, 3H; –CH<sub>3</sub>), 1.16 (s, 3H; –CH<sub>3</sub>). <sup>13</sup>C {<sup>1</sup>H} NMR (125 MHz, CDCl<sub>3</sub>, 298 K):  $\delta$ /ppm = 166.03, 159.69, 159.35, 152.83, 146.59, 141.05, 138.34, 135.78, 131.74, 131.67, 128.54, 127.90, 125.97, 122.80, 121.90, 121.62, 119.96, 118.36, 115.53, 108.30, 107.32, 107.00, 106.71, 106.42, 72.34, 71.93, 70.82, 70.69, 70.54, 70.36, 69.73, 68.92, 63.18, 59.02, 52.92, 42.33, 25.88, 19.82. Positive HR-ESI MS: calcd for  $[C_{83}H_{121}N_2O_{31}]^+$   $m/z$  1641.7953; found 1641.7949  $[M+H]^+$ . Elemental analysis calcd (%) for  $C_{83}H_{120}N_2O_{31}$ : C 60.72, H 7.37, N 1.71; found: C 60.86, H 7.32, N 1.59.



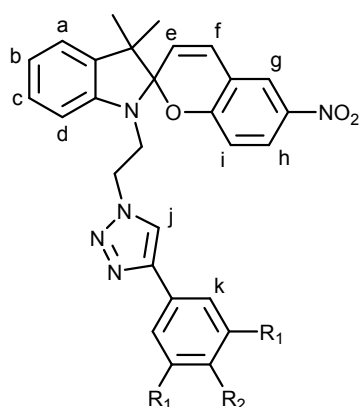

4  $R_1 = \text{O}(\text{CH}_2\text{CH}_2\text{O})_3\text{CH}_3$   $R_2 = \text{H}$

5  $R_1 = R_2 = \text{O}(\text{CH}_2\text{CH}_2\text{O})_3\text{CH}_3$

Compound 4. This was prepared according to a modification of the procedures for azide-alkyne click reaction in the literature.<sup>4,11</sup> To a solution of SP-N<sub>3</sub> (315 mg, 0.83 mmol) and 2TEG-Ph-alkyne (295 mg, 0.69 mmol) in dichloromethane (30 mL) were added sodium ascorbate (100 mg, 0.50 mmol) and CuSO<sub>4</sub>•5H<sub>2</sub>O (253 mg, 1.01 mmol) in deionized water (20 mL). The mixture was stirred at room temperature under nitrogen atmosphere overnight. The organic phase was separated and washed by deionized water, and was dried over anhydrous Na<sub>2</sub>SO<sub>4</sub>. After the solvent was removed under reduced pressure, the crude product was purified by column chromatography on silica gel (100–200 mesh) in the dark with ethyl acetate-methanol (10:1 v/v) as the eluent to give the product as an oil with a pale blue tint. Yield: 556 mg, 0.59 mmol (86 %). <sup>1</sup>H NMR (500 MHz, CDCl<sub>3</sub>, 298 K, relative to Me<sub>4</sub>Si):  $\delta$ /ppm = 8.05–7.96 (m, 2H; H<sub>b</sub>, H<sub>g</sub>), 7.61 (s, 1H; H<sub>j</sub>), 7.25 (t,  $J = 7.3$  Hz, 1H; H<sub>c</sub>), 7.14 (d,  $J = 7.3$  Hz, 1H; H<sub>a</sub>), 7.02–6.92 (m, 3H; H<sub>b</sub>, H<sub>k</sub>), 6.80 (d,  $J = 10.4$  Hz, 1H; H<sub>f</sub>), 6.75 (d,  $J = 8.9$  Hz, 1H; H<sub>i</sub>), 6.62 (d,  $J = 7.3$  Hz, 1H; H<sub>d</sub>), 6.51 (s, 1H; R<sub>2</sub>), 5.16 (d,  $J = 10.4$  Hz, 1H; H<sub>e</sub>), 4.67–4.58 (m, 2H; –CH<sub>2</sub>N–), 4.24–4.12 (m, 4H; –OCH<sub>2</sub>–), 3.94–3.53 (m, 22H; CH<sub>2</sub>, –NCH<sub>2</sub>–), 3.40 (s, 6H; –OCH<sub>3</sub>), 1.27 (s, 3H; –CH<sub>3</sub>), 1.10 (s, 3H; –CH<sub>3</sub>). <sup>13</sup>C{<sup>1</sup>H} NMR (125 MHz, CDCl<sub>3</sub>, 298 K):  $\delta$ /ppm = 160.34, 158.94, 147.56, 145.85, 141.26, 136.10, 132.06, 128.77, 127.99, 125.97, 122.84, 122.23, 121.11, 120.67, 118.37, 115.50, 106.46, 106.30, 104.50, 101.74, 71.94, 70.83, 70.68, 70.59, 69.69, 67.63, 59.04, 52.72, 48.80, 44.44, 25.78, 19.83. Positive HR-ESI MS: calcd for [C<sub>42</sub>H<sub>54</sub>N<sub>5</sub>O<sub>11</sub>]<sup>+</sup>  $m/z$  804.3820; found 804.3814 [M+H]<sup>+</sup>. Elemental analysis calcd (%) for C<sub>42</sub>H<sub>53</sub>N<sub>5</sub>O<sub>11</sub>: C 62.75, H 6.65, N 8.71; found: C 62.37, H 6.64, N 8.45.

Compound **5**. This was prepared from a similar procedure as that of compound **4**, except 3TEG-Ph-alkyne (490 mg, 0.83 mmol) was used instead of 2TEG-Ph-alkyne. Yield: 773 mg, 0.67 mmol (81 %). <sup>1</sup>H NMR (500 MHz, CDCl<sub>3</sub>, 298 K, relative to Me<sub>4</sub>Si): δ/ppm = 8.03–7.94 (m, 2H; H<sub>h</sub>, H<sub>g</sub>), 7.60 (s, 1H; H<sub>j</sub>), 7.23 (t, *J* = 7.3 Hz, 1H; H<sub>c</sub>), 7.12 (d, *J* = 7.3 Hz, 1H; H<sub>a</sub>), 7.01 (s, 2H; H<sub>k</sub>), 6.95 (t, *J* = 7.3 Hz, 1H; H<sub>b</sub>), 6.79 (d, *J* = 10.4 Hz, 1H; H<sub>f</sub>), 6.73 (d, *J* = 8.8 Hz, 1H; H<sub>i</sub>), 6.61 (d, *J* = 7.3 Hz, 1H; H<sub>d</sub>), 5.15 (d, *J* = 10.4 Hz, 1H; H<sub>e</sub>), 4.64–4.55 (m, 2H; –CH<sub>2</sub>N–), 4.26–4.11 (m, 6H; –OCH<sub>2</sub>–), 3.91–3.47 (m, 32H; CH<sub>2</sub>, –NCH<sub>2</sub>–), 3.42–3.32 (m, 9H; –OCH<sub>3</sub>), 1.24 (s, 3H; –CCH<sub>3</sub>), 1.09 (s, 3H; –CCH<sub>3</sub>). <sup>13</sup>C{<sup>1</sup>H} NMR (125 MHz, CDCl<sub>3</sub>, 298 K): δ/ppm = 158.93, 153.07, 147.47, 145.88, 141.26, 138.72, 136.11, 128.81, 127.99, 125.97, 125.79, 122.83, 122.23, 120.73, 120.62, 118.38, 115.50, 106.46, 106.34, 105.48, 72.41, 71.93, 70.79, 70.69, 70.54, 69.74, 69.01, 59.01, 52.73, 48.76, 44.42, 25.77, 19.82. Positive HR-ESI MS: calcd for [C<sub>49</sub>H<sub>68</sub>N<sub>5</sub>O<sub>15</sub>]<sup>+</sup> *m/z* 966.4712; found 966.4706 [M+H]<sup>+</sup>. Elemental analysis calcd (%) for C<sub>49</sub>H<sub>67</sub>N<sub>5</sub>O<sub>15</sub>: C 60.92, H 6.99, N 7.25; found: C 60.54, H 7.09, N 6.88.

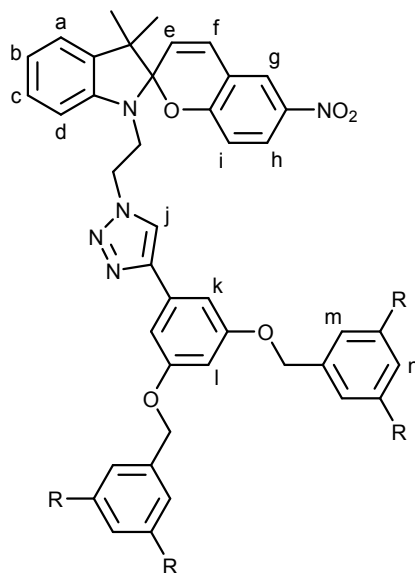

**6** R = O(CH<sub>2</sub>CH<sub>2</sub>O)<sub>3</sub>CH<sub>3</sub>

Compound **6**. This was prepared from a similar procedure as that of compound **4**, except G2-2TEG-Ph-alkyne (490 mg, 0.51 mmol) was used instead of 2TEG-Ph-alkyne. Yield: 576 mg, 0.43 mmol (84%). <sup>1</sup>H NMR (500 MHz, CDCl<sub>3</sub>, 298 K, relative to Me<sub>4</sub>Si): δ/ppm = 8.03–7.94 (m, 2H; H<sub>h</sub>, H<sub>g</sub>), 7.61 (s, 1H; H<sub>j</sub>), 7.22 (d, *J* = 7.3 Hz, 1H; H<sub>c</sub>), 7.12 (d, *J* = 7.3 Hz, 1H; H<sub>a</sub>), 7.01

(s, 2H; H<sub>k</sub>), 6.95 (t,  $J = 7.3$  Hz, 1H; H<sub>b</sub>), 6.78 (d,  $J = 10.4$  Hz, 1H; H<sub>f</sub>), 6.72 (d,  $J = 8.9$  Hz, 1H; H<sub>i</sub>), 6.65–6.54 (m, 6H; H<sub>m</sub>, H<sub>d</sub>, H<sub>l</sub>), 6.45 (s, 2H; H<sub>n</sub>), 5.15 (d,  $J = 10.4$  Hz, 1H; H<sub>e</sub>), 4.99 (s, 4H; –OCH<sub>2</sub>–), 4.65–4.57 (m, 2H; –CH<sub>2</sub>O–), 4.15–4.07 (m, 8H; –OCH<sub>2</sub>–), 3.88–3.76 (m, 8H; –CH<sub>2</sub>O–), 3.76–3.61 (m, 26H; –CH<sub>2</sub>–, –NCH<sub>2</sub>–), 3.58–3.51 (m, 8H; –CH<sub>2</sub>O–), 3.37 (s, 12H; –OCH<sub>3</sub>), 1.23 (s, 3H; –CH<sub>3</sub>), 1.08 (s, 3H; –CH<sub>3</sub>). <sup>13</sup>C {<sup>1</sup>H} NMR (125 MHz, CDCl<sub>3</sub>, 298 K):  $\delta$ /ppm = 160.32, 160.12, 158.94, 147.49, 145.85, 141.26, 138.96, 136.11, 132.22, 128.80, 127.99, 125.97, 122.85, 122.24, 121.18, 120.66, 118.38, 115.50, 106.45, 106.31, 106.13, 104.78, 102.03, 101.18, 71.94, 70.82, 70.66, 70.58, 70.05, 69.68, 67.52, 59.04, 52.74, 48.83, 44.42, 25.77, 19.83. Positive HR-ESI MS: calcd for [C<sub>70</sub>H<sub>94</sub>N<sub>5</sub>O<sub>21</sub>]<sup>+</sup>  $m/z$  1340.6441; found 1340.6436 [M+H]<sup>+</sup>. Elemental analysis calcd (%) for C<sub>70</sub>H<sub>93</sub>N<sub>5</sub>O<sub>21</sub>: C 62.72, H 6.99, N 5.22; found: C 62.39, H 6.96, N 5.00.

## Physical measurements and instrumentation

<sup>1</sup>H NMR (500 MHz) and <sup>13</sup>C {<sup>1</sup>H} NMR (125 MHz) spectra were obtained on a Bruker DRX 500 (500 MHz) spectrometer at 298 K with chemical shifts reported relative to tetramethylsilane (Me<sub>4</sub>Si). Positive-ion electrospray ionization (ESI) mass spectra were recorded on a Bruker maXis II ESI-QTOF mass spectrometer. Elemental analysis was carried out on a Flash EA1112 analyzer from ThermoQuest Italia S.P.A. UV-Vis absorption spectra were recorded using a Varian Cary 50 UV-vis spectrophotometer. Steady-state excitation and emission spectra at room temperature were obtained on an Edinburgh Instruments FS5 spectrofluorometer. Photoirradiation was carried out using a 300 W Oriel Corporation Model 60011 Xe (ozone-free) lamp, and monochromatic light was obtained by passing the light through an Applied Photophysics F 3.4 monochromator, and the path length of optical cuvettes is 1 cm. Dynamic light scattering (DLS) measurements were performed by using a Malvern Zetasizer NanoZS instrument. Transmission electron microscopic (TEM) images were obtained with a JEM-2100F electron microscope operating at 200 kV. Atomic force microscope (AFM) measurements were carried out on a Bruker FastScan atomic force microscope. Fluorescence

microscopy images were obtained from fluorescence microscopy (Vision Engineering Co., UK).

The thermal bleaching reaction of spiropyran is known to follow first order kinetics at various temperatures. The kinetics for the bleaching reaction were determined by measurement of the UV-vis spectral changes at various temperatures by use of a Varian Cary 50 UV-vis spectrophotometer, with the temperature controlled by a Varian Cary single cell Peltier thermostat. The first-order rate constants were obtained by taking the negative value of the slope of a linear least-squares fit of  $\ln [(A - A_\infty)/(A_0 - A_\infty)]$  against time according to Equation(1),

$$\ln [(A - A_\infty)/(A_0 - A_\infty)] = -kt \quad (1)$$

where  $A$ ,  $A_0$ , and  $A_\infty$  are the absorbances at the absorption wavelength maximum of the photomerocyanine at times  $t$ , 0 and infinity, respectively and  $k$  is the rate constant of the reaction. The kinetics parameters were obtained by a linear least-squares fitting of  $\ln (k/T)$  against  $1/T$  according to the linear expression of the Eyring equation (2),  $\ln k$  against  $1/T$  according to the Arrhenius equation (3), and the change in Gibbs free energy of activation ( $\Delta G^\ddagger$ ) at 298 K were determined according to equation (4),

$$\ln (k/T) = - (\Delta H^\ddagger/R) (1/T) + \ln (k_B h^{-1}) + (\Delta S^\ddagger/R) \quad (2)$$

$$\ln (k) = - E_a/RT + \ln A \quad (3)$$

$$\Delta G^\ddagger = \Delta H^\ddagger - T \Delta S^\ddagger \quad (4)$$

where  $\Delta H^\ddagger$  and  $\Delta S^\ddagger$  are the changes in activation enthalpy and entropy, respectively,  $T$  is the temperature, and  $k_B$ ,  $R$ ,  $h$ , and  $A$  are the Boltzmann's constant, the universal gas constant, the Planck constant and the frequency factor, respectively.

### Sample preparation

The samples for TEM measurements were prepared by adding a few drops of solutions onto a carbon-coated copper grid. They were then dried in air until the solvent was completely evaporated off in the dark. The sample preparation for AFM measurements was the same as that for TEM except that 10  $\mu\text{L}$  of solution was dropped onto a silicon wafer. The sample solutions for DLS measurements were filtered and allowed to stand under room conditions for 2 min before tests.

## Computational details

All calculations in this study were performed with the Gaussian 09 suite of programs.<sup>12</sup> By density functional theory (DFT), the ground-state ( $S_0$ ) geometries of the closed and open forms of compound **5** were fully optimized in THF solution with the long range corrected B3LYP functional using the Coulomb-attenuating method (CAM-B3LYP),<sup>13</sup> in conjunction with the polarizable continuum model (PCM).<sup>14</sup> On the basis of the optimized  $S_0$  geometries of the open and closed forms of **5**, time-dependent DFT (TDDFT)<sup>15–17</sup> calculations were performed for the computation of the singlet–singlet transitions in the electronic absorption spectra. In order to investigate the noncovalent interactions in the dimeric form of **5**, the geometry of the dimer of the open merocyanine form of **5** was optimized with the PBE0-D3(BJ) functional<sup>18–22</sup> in THF–*n*-hexane (1 : 9 v/v) solution, and noncovalent interactions (NCI) analysis was performed on the optimized geometry with NCIPLOT.<sup>23</sup> The Cartesian coordinates of the optimized  $S_0$  geometries of the closed and open forms of compound **5**, as well as the dimer of the open form, are given in Table S2–S4 respectively. Vibrational frequencies of all the optimized geometries have been computed and all of them were confirmed to be minima on the potential energy surface, as there are no imaginary frequencies observed (NIMAG = 0). For all the calculations, the 6-31G(d,p) basis set<sup>24–27</sup> was employed to describe all the atoms, and a pruned (99,590) grid was employed for numerical integration.

## Isokinetic relationship

When a series of structurally related substrates undergo the same general reaction or when the reaction conditions for a single substrate are changed in a systematic way, the enthalpies and entropies of activation sometimes satisfy the relation,<sup>28</sup>

$$\Delta H^\ddagger - \beta \Delta S^\ddagger = \text{constant}$$

where the parameter  $\beta$  is independent of temperature. This equation represents an ‘isokinetic relationship’. The temperature  $T = \beta$ , at which all members of a series obeying the isokinetic relationship react at the same rate, is termed the ‘isokinetic temperature’.

## References

1. D. R. Coulson, L. C. Satek and S. O. Grim, Tetrakis (triphenylphosphine) palladium(0), *Inorg. Synth.*, 1972, **13**, 121–124.
2. F. M. Raymo and S. Giordani, Signal processing at the molecular level, *J. Am. Chem. Soc.*, 2001, **123**, 4651–4652.
3. J. Yan, L. X. Zhao, C. Li, Z. Hu, G. F. Zhang, Z. Q. Chen, T. Chen, Z. L. Huang, J. Zhu and M. Q. Zhu, Optical nanoimaging for block copolymer self-assembly, *J. Am. Chem. Soc.* 2015, **137**, 2436–2439.
4. Y. Zhang, M. Ng, E. Y.-H. Hong, A. K.-W. Chan, N. M.-W. Wu, M. H.-Y. Chan, L. Wu and V. W.-W. Yam, Synthesis and photoswitchable amphiphilicity and self-assembly properties of photochromic spiropyran derivatives, *J. Mater. Chem. C*, 2020, **8**, 13676–13685.
5. S. Zhang, H.-J. Sun, A. D. Hughes, B. Draghici, J. Lejniaks, P. Leowanawat, A. Bertin, L. Otero De Leon, O. V. Kulikov, Y. Chen, D. J. Pochan, P. A. Heiney and V. Percec, “Single-single” amphiphilic janus dendrimers self-assemble into uniform dendrimersomes with predictable size, *ACS Nano*, 2014, **8**, 1554–1565.
6. C. Po and V. W.-W. Yam, A metallo-amphiphile with unusual memory behaviour: effect of temperature and structure on the self-assembly of triethylene glycol (TEG)-pendant platinum(II) bzimpy complexes, *Chem. Sci.*, 2014, **5**, 4868–4872.
7. X. Li, C.-T. Poon, E. Y.-H. Hong, H.-L. Wong, A. K.-W. Chan, L. Wu and V. W.-W. Yam, Multi-modulation for self-assemblies of amphiphilic rigid-soft compounds through alteration of solution polarity and temperature, *Soft Matter*, 2017, **13**, 8408–8418.
8. K. C. Elbert, D. Jishkariani, Y. Wu, J. D. Lee, B. Donnio and C. B. Murray, Design, self-assembly, and switchable wettability in hydrophobic, hydrophilic, and janus dendritic ligand-gold nanoparticle hybrid materials, *Chem. Mater.*, 2017, **29**, 8737–8746.
9. H. Chen, Y. Yang, Y. Wang and L. Wu, Synthesis, structural characterization, and thermoresponsivity of hybrid supramolecular dendrimers bearing a polyoxometalate core, *Chem. - Eur. J.*, 2013, **19**, 11051–11061.
10. M. H.-Y. Chan, S. Y.-L. Leung and V. W.-W. Yam, Rational design of multi-stimuli-responsive scaffolds: synthesis of luminescent oligo(ethynylpyridine)-containing alkynylplatinum(II) polypyridine foldamers stabilized by Pt···Pt interactions, *J. Am. Chem. Soc.*, 2019, **141**, 1231–12321.
11. L. Kong, H.-L. Wong, A. Y.-Y. Tam, W. H. Lam, L. Wu and V. W.-W. Yam, Synthesis, characterization, and photophysical properties of bodipy-spirooxazine and -spiropyran conjugates: modulation of fluorescence resonance energy transfer behavior via acidochromic and photochromic switching, *ACS Appl. Mater. Interfaces*, 2014, **6**, 1550–1562.
12. M. J. Frisch, G. W. Trucks, H. B. Schlegel, G. E. Scuseria, M. A. Robb, J. R. Cheeseman, G. Scalmani, V. Barone, B. Mennucci, G. A. Petersson, H. Nakatsuji, M. Caricato, X. Li, H. P. Hratchian, A. F. Izmaylov, J. Bloino, G. Zheng, J. L. Sonnenberg, M. Hada, M. Ehara, K. Toyota, R. Fukuda, J. Hasegawa, M. Ishida, T. Nakajima, Y.

- Honda, O. Kitao, H. Nakai, T. Vreven, Jr. Montgomery, J. A., J. E. Peralta, F. Ogliaro, M. Bearpark, J. J. Heyd, E. Brothers, K. N. Kudin, V. N. Staroverov, T. Keith, R. Kobayashi, J. Normand, K. Raghavachari, A. Rendell, J. C. Burant, S. S. Iyengar, J. Tomasi, M. Cossi, N. Rega, J. M. Millam, M. Klene, J. E. Knox, J. B. Cross, V. Bakken, C. Adamo, J. Jaramillo, R. Gomperts, R. E. Stratmann, O. Yazyev, A. J. Austin, R. Cammi, C. Pomelli, J. W. Ochterski, R. L. Martin, K. Morokuma, V. G. Zakrzewski, G. A. Voth, P. Salvador, J. J. Dannenberg, S. Dapprich, A. D. Daniels, O. Farkas, J. B. Foresman, J. V. Ortiz, J. Cioslowski and D. J. Fox, Gaussian 09 (Revision D.01), Gaussian, Inc.: Wallingford CT, 2013.
13. T. Yanai, D. P. Tew and N. C. Handy, A new hybrid exchange-correlation functional using the coulomb-attenuating method (CAM-B3LYP), *Chem. Phys. Lett.*, 2004, **393**, 51–57.
  14. M. Cossi, G. Scalmani, N. Rega and V. Barone, New developments in the polarizable continuum model for quantum mechanical and classical calculations on molecules in solution, *J. Chem. Phys.*, 2002, **117**, 43–54.
  15. R. E. Stratmann, G. E. Scuseria and M. J. Frisch, An efficient implementation of time-dependent density-functional theory for the calculation of excitation energies of large molecules, *J. Chem. Phys.*, 1998, **109**, 8218–8224.
  16. R. Bauernschmitt and R. Ahlrichs, Treatment of electronic excitations within the adiabatic approximation of time dependent density functional theory, *Chem. Phys. Lett.*, 1996, **256**, 454–464.
  17. M. E. Casida, C. Jamorski, K. C. Casida and D. R. Salahub, Molecular excitation energies to high-lying bound states from time-dependent density-functional response theory: characterization and correction of the time-dependent local density approximation ionization threshold, *J. Chem. Phys.*, 1998, **108**, 4439–4449.
  18. C. Adamo and V. Barone, Toward reliable density functional methods without adjustable parameters: the PBE0 mode, *J. Chem. Phys.*, 1999, **110**, 6158–6170.
  19. S. Grimme, J. Antony, S. Ehrlich and H. Krieg, A consistent and accurate ab initio parametrization of density functional dispersion correction (DFT-D) for the 94 elements H-Pu, *J. Chem. Phys.*, 2010, **132**, 154104.
  20. A. D. Becke and E. R. Johnson, A density-functional model of the dispersion interaction, *J. Chem. Phys.*, 2005, **123**, 154101.
  21. E. R. Johnson and A. D. Becke, A post-hartree-fock model of intermolecular interactions, *J. Chem. Phys.*, 2005, **123**, 024101.
  22. E. R. Johnson and A. D. Becke, A post-hartree-fock model of intermolecular interactions: inclusion of higher-order corrections, *J. Chem. Phys.*, 2006, **124**, 174104.
  23. J. Contreras-García, E. R. Johnson, S. Keinan, R. Chaudret, J.-P. Piquemal, D. N. Beratan and W. Yang, NCIPLLOT: a program for plotting noncovalent interaction regions, *J. Chem. Theory Comput.*, 2011, **7**, 625–632.
  24. W. J. Hehre, R. Ditchfie and J. A. Pople, Self-consistent molecular orbital methods. XII. Further extensions of Gaussian-type basis sets for use in molecular orbital studies of organic molecules, *J. Chem. Phys.*, 1972, **56**, 2257–2261.
  25. P. C. Hariharan and J. A. Pople, The influence of polarization functions on molecular

- orbital hydrogenation energies, *Theor. Chim. Acta*, 1973, **28**, 213–222.
26. J. D. Dill and J. A. Pople, Self-consistent molecular orbital methods. XV. Extended Gaussian-type basis sets for lithium, beryllium, and boron, *J. Chem. Phys.*, 1975, **62**, 2921–2923.
  27. M. M. Francl, W. J. Pietro, W. J. Hehre, J. S. Binkley, M. S. Gordon, D. J. Defrees and J. A. Pople, Self-consistent molecular orbital methods. XXIII. A polarization-type basis set for second-row elements, *J. Chem. Phys.*, 1982, **77**, 3654–3665.
  28. P. Muller, Glossary of terms used in physical organic chemistry (IUPAC Recommendations 1994). *Pure & Appl. Chem.*, 1994; **66**, 1077–1184.
